# Supplementary material
Source: PubMed Central journal article supplement (PMC9023069)
Supplement: NIHMS1792121-supplement-1792121_Sup_file_1.pdf [file NIHMS1792121-supplement-1792121_Sup_file_1.pdf]

| Gene_ID  | CT6      | CT7      | CT5      | CT8      | log2FoldCl | pvalue   | padj     | GeneName | Chrom | Strand | Start    | End      | GeneLengt | GeneType                | GeneDescr | CT6_readc | CT7_readc | CT5_readc | CT8_readc | CT6_fpk  | CT7_fpk  | CT5_fpk  | CT8_fpk  |
|----------|----------|----------|----------|----------|------------|----------|----------|----------|-------|--------|----------|----------|-----------|-------------------------|-----------|-----------|-----------|-----------|-----------|----------|----------|----------|----------|
| ENSMUSG1 | 2687.519 | 2947.201 | 1999.951 | 2238.282 | 0.37811    | 0.004182 | 0.035192 | Nalcn    | chr14 | -      | 1.23E+08 | 1.24E+08 | 7115      | protein_co sodium_le    |           | 2972      | 3046      | 1964      | 2022      | 16.24041 | 17.73305 | 11.6744  | 13.5281  |
| ENSMUSG1 | 3165.883 | 3128.136 | 2106.874 | 2313.556 | 0.47289    | 0.000182 | 0.003973 | Acvr1b   | chr15 | +      | 1.01E+08 | 1.01E+08 | 4413      | protein_coactivin_A     |           | 3501      | 3233      | 2069      | 2090      | 30.84476 | 30.34591 | 19.82872 | 22.54463 |
| ENSMUSG1 | 1719.035 | 1411.676 | 1149.667 | 1137.96  | 0.40612    | 0.006088 | 0.045148 | Gabra2   | chr5  | -      | 70961057 | 71095849 | 2392      | protein_co gamma-an     |           | 1901      | 1459      | 1129      | 1028      | 30.89898 | 25.26519 | 19.96185 | 20.45798 |
| ENSMUSG1 | 1285.885 | 1240.418 | 825.8455 | 997.3751 | 0.41935    | 0.005843 | 0.043851 | Sox9     | chr11 | +      | 1.13E+08 | 1.13E+08 | 4135      | protein_co SRY_(sex_c   |           | 1422      | 1282      | 811       | 901       | 13.37049 | 12.84224 | 8.294942 | 10.37242 |
| ENSMUSG1 | 4260.061 | 4082.154 | 3095.648 | 2948.954 | 0.43422    | 0.000317 | 0.005834 | Ddx3x    | chrX  | +      | 13280970 | 13294052 | 4692      | protein_co DEAD/H_(u    |           | 4711      | 4219      | 3040      | 2664      | 39.03717 | 37.24602 | 27.40208 | 27.02757 |
| ENSMUSG1 | 7877.179 | 7719.228 | 5881.731 | 6265.419 | 0.33934    | 0.00311  | 0.028619 | Dnajc5   | chr2  | +      | 1.82E+08 | 1.82E+08 | 6578      | protein_co DnaJ_(Hsp    |           | 8711      | 7978      | 5776      | 5660      | 51.48697 | 50.23756 | 37.13653 | 40.95937 |
| ENSMUSG1 | 1948.722 | 1684.53  | 1163.923 | 1253.084 | 0.53268    | 0.000185 | 0.003988 | Bcl11a   | chr11 | +      | 24078056 | 24174123 | 5989      | protein_co B_cell_CLL   |           | 2155      | 1741      | 1143      | 1132      | 13.98995 | 12.04128 | 8.071606 | 8.99752  |
| ENSMUSG1 | 3644.246 | 4118.921 | 2557.983 | 3110.57  | 0.41375    | 0.002727 | 0.025905 | Dlg3     | chrX  | +      | 1.01E+08 | 1.01E+08 | 5017      | protein_co discs_large  |           | 4030      | 4257      | 2512      | 2810      | 31.23087 | 35.14697 | 21.17598 | 26.66201 |
| ENSMUSG1 | 988.3775 | 1104.958 | 709.7587 | 758.2707 | 0.45491    | 0.002969 | 0.027522 | Sec24b   | chr3  | -      | 1.3E+08  | 1.3E+08  | 5128      | protein_co Sec24_rela   |           | 1093      | 1142      | 697       | 685       | 8.286962 | 9.224577 | 5.748477 | 6.358772 |
| ENSMUSG1 | 2029.203 | 1627.443 | 1226.039 | 1295.149 | 0.48085    | 0.001217 | 0.014961 | Luzp1    | chr4  | +      | 1.36E+08 | 1.37E+08 | 7526      | protein_co leucine_zif  |           | 2244      | 1682      | 1204      | 1170      | 11.59263 | 9.257424 | 6.765974 | 7.400352 |
| ENSMUSG1 | 5472.7   | 5590.587 | 3748.382 | 4225.284 | 0.44063    | 0.000311 | 0.005791 | Mef2d    | chr3  | +      | 88142372 | 88172086 | 5401      | protein_co myocyte_e    |           | 6052      | 5778      | 3681      | 3817      | 43.56602 | 44.31306 | 28.82436 | 33.64176 |
| ENSMUSG1 | 3511.317 | 3556.767 | 2466.335 | 2820.546 | 0.38779    | 0.002431 | 0.023879 | Kpnb1    | chr11 | -      | 97159714 | 97187881 | 5894      | protein_co karyopheri   |           | 3883      | 3676      | 2422      | 2548      | 25.61418 | 25.83412 | 17.37929 | 20.5788  |
| ENSMUSG1 | 654.6984 | 677.295  | 441.9445 | 423.9674 | 0.53633    | 0.001322 | 0.016004 | Nup214   | chr2  | +      | 31974436 | 32053975 | 6605      | protein_co nucleoporin  |           | 724       | 700       | 434       | 383       | 4.261759 | 4.38989  | 2.778977 | 2.760302 |
| ENSMUSG1 | 1841.113 | 1982.539 | 1086.532 | 1176.703 | 0.69012    | 5.53E-07 | 5.77E-05 | Griik3   | chr4  | +      | 1.25E+08 | 1.26E+08 | 8973      | protein_co glutamate    |           | 2036      | 2049      | 1067      | 1063      | 8.821923 | 9.458726 | 5.029152 | 5.639314 |
| ENSMUSG1 | 1558.978 | 1413.612 | 1094.678 | 1129.104 | 0.38018    | 0.007011 | 0.049651 | Sipa1l2  | chr8  | -      | 1.25E+08 | 1.25E+08 | 6365      | protein_co signal-indu  |           | 1724      | 1461      | 1075      | 1020      | 10.53082 | 9.507803 | 7.142958 | 7.628383 |
| ENSMUSG1 | 3926.062 | 2305.706 | 955.1703 | 997.3751 | 1.0104     | 2.41E-12 | 4.14E-09 | Kmt2a    | chr9  | -      | 44803355 | 44881296 | 16470     | protein_co lysine_(K)-  |           | 2141      | 2383      | 938       | 901       | 5.054128 | 5.993201 | 2.40867  | 2.604125 |
| ENSMUSG1 | 3022.102 | 3433.886 | 2087.526 | 2262.636 | 0.52447    | 6.62E-05 | 0.001989 | Supt6    | chr11 | -      | 78206746 | 78245987 | 6488      | protein_co suppressor   |           | 3342      | 3549      | 2050      | 2044      | 20.02713 | 22.6281  | 13.36322 | 14.96967 |
| ENSMUSG1 | 6131.919 | 7270.279 | 4400.097 | 4673.604 | 0.5208     | 4.58E-05 | 0.00154  | Celf2    | chr2  | -      | 6539694  | 7509563  | 8856      | protein_co CUGBP_El     |           | 6781      | 7514      | 4321      | 4222      | 29.77003 | 35.14487 | 20.63549 | 22.69401 |
| ENSMUSG1 | 3440.784 | 3192.962 | 2525.397 | 2599.153 | 0.34646    | 0.005248 | 0.04105  | Rmnd5a   | chr6  | -      | 71388634 | 71440637 | 6165      | protein_co required_f   |           | 3805      | 3300      | 2480      | 2348      | 23.99633 | 22.17222 | 17.01322 | 18.12991 |
| ENSMUSG1 | 4391.048 | 4842.66  | 2356.358 | 2262.636 | 0.73757    | 2.10E-06 | 0.00016  | Peg3     | chr7  | -      | 6703892  | 6730421  | 8694      | protein_co paternally   |           | 3750      | 5005      | 2314      | 2044      | 16.77007 | 23.84585 | 11.25672 | 11.19159 |
| ENSMUSG1 | 3879.359 | 4129.565 | 2811.541 | 3306.503 | 0.35832    | 0.006077 | 0.045105 | Ncan     | chr8  | -      | 70093085 | 70120873 | 7195      | protein_co neurocan     |           | 4290      | 4268      | 2761      | 2987      | 23.18193 | 24.57095 | 16.22944 | 19.76219 |
| ENSMUSG1 | 1930.637 | 2244.749 | 1264.735 | 1373.743 | 0.60099    | 2.02E-05 | 0.000843 | Braf     | chr6  | -      | 39603237 | 39725463 | 9728      | protein_co Braf_trans   |           | 2135      | 2320      | 1242      | 1241      | 8.532916 | 9.87851  | 5.996566 | 6.07266  |
| ENSMUSG1 | 404.2129 | 598.9239 | 239.3017 | 304.4153 | 0.68073    | 0.000877 | 0.011899 | Cdk12    | chr11 | +      | 98203059 | 98278504 | 5912      | protein_co cyclin-depr  |           | 447       | 619       | 235       | 275       | 2.939654 | 4.336952 | 1.681131 | 2.214262 |
| ENSMUSG1 | 691.7738 | 693.7436 | 458.2374 | 494.8132 | 0.46845    | 0.004538 | 0.036925 | Foxj2    | chr6  | +      | 1.23E+08 | 1.23E+08 | 5283      | protein_co forkhead_l   |           | 765       | 717       | 450       | 447       | 5.629943 | 5.62169  | 3.602466 | 4.027705 |
| ENSMUSG1 | 439.4798 | 374.4474 | 190.4231 | 265.6715 | 0.64678    | 0.001509 | 0.01722  | Mical3   | chr6  | -      | 1.21E+08 | 1.21E+08 | 2893      | protein_co microtubu    |           | 486       | 387       | 187       | 240       | 6.531471 | 5.541305 | 2.733765 | 3.949058 |
| ENSMUSG1 | 2903.642 | 3072.017 | 1968.384 | 2081.093 | 0.52056    | 3.83E-05 | 0.001369 | Ranbp2   | chr10 | +      | 58446852 | 58494155 | 9477      | protein_co RAN_bindi    |           | 3211      | 3175      | 1933      | 1880      | 13.17324 | 13.87718 | 8.626388 | 9.443167 |
| ENSMUSG1 | 866.2998 | 925.9591 | 589.5987 | 658.6439 | 0.45965    | 0.003614 | 0.031727 | Dvl3     | chr16 | +      | 20516982 | 20532520 | 2936      | protein_co dishevelle   |           | 958       | 957       | 579       | 595       | 12.68623 | 13.50157 | 8.34047  | 9.646986 |
| ENSMUSG1 | 4412.884 | 4274.699 | 2425.603 | 2837.15  | 0.6682     | 2.30E-07 | 2.80E-05 | Glg1     | chr8  | -      | 1.11E+08 | 1.11E+08 | 7021      | protein_co golgi_appa   |           | 4880      | 4418      | 2382      | 2563      | 27.02365 | 26.06484 | 14.34864 | 17.37722 |
| ENSMUSG1 | 1797.708 | 2181.858 | 1407.298 | 1326.144 | 0.48876    | 0.000714 | 0.01032  | Snrnp200 | chr2  | +      | 1.27E+08 | 1.27E+08 | 6745      | protein_co small_nucl   |           | 1988      | 2255      | 1382      | 1198      | 11.45929 | 13.84819 | 8.46651  | 8.548484 |
| ENSMUSG1 | 1108.647 | 1366.201 | 676.1547 | 654.216  | 0.78744    | 6.54E-07 | 6.64E-05 | Nfat5    | chr8  | +      | 1.07E+08 | 1.07E+08 | 6343      | protein_co nuclear_fa   |           | 1226      | 1412      | 664       | 591       | 3.545826 | 4.503777 | 2.089007 | 2.092772 |
| ENSMUSG1 | 1050.773 | 1121.407 | 681.2462 | 801.4423 | 0.48778    | 0.001694 | 0.018603 | Dnmt1    | chr9  | -      | 20907206 | 20959888 | 5876      | protein_co DNA_meth     |           | 1162      | 1159      | 669       | 724       | 7.688604 | 8.17015  | 4.815178 | 5.865263 |
| ENSMUSG1 | 2200.112 | 4026.035 | 1307.504 | 1383.706 | 0.9903     | 1.28E-07 | 1.76E-05 | Cacna1e  | chr1  | -      | 1.54E+08 | 1.55E+08 | 14921     | protein_co calcium_cf   |           | 2433      | 4161      | 1284      | 1250      | 6.33968  | 11.55123 | 3.639445 | 3.987887 |
| ENSMUSG1 | 1688.29  | 1998.02  | 794.2781 | 1094.788 | 0.83657    | 4.13E-07 | 4.69E-05 | Cacna1b  | chr2  | -      | 24603887 | 24763152 | 9736      | protein_co calcium_cf   |           | 1867      | 2065      | 780       | 989       | 7.455674 | 8.785528 | 3.388302 | 4.835556 |
| ENSMUSG1 | 266.7625 | 345.4205 | 162.9288 | 167.1516 | 0.66848    | 0.001487 | 0.017148 | Utp20    | chr10 | -      | 88746607 | 88826814 | 8831      | protein_co UTP20_sm     |           | 295       | 357       | 160       | 151       | 1.298779 | 1.674506 | 0.766263 | 0.81395  |
| ENSMUSG1 | 3802.495 | 3753.182 | 2708.692 | 2951.167 | 0.38834    | 0.001592 | 0.017843 | Large    | chr8  | -      | 72814599 | 73353540 | 4647      | protein_co like-glycos  |           | 4205      | 3879      | 2660      | 2666      | 35.18167 | 34.57606 | 24.20901 | 27.30978 |
| ENSMUSG1 | 861.7784 | 883.3863 | 646.0177 | 694.0668 | 0.50592    | 0.006516 | 0.047442 | Hdac9    | chr12 | -      | 34371503 | 34528889 | 4422      | protein_co histone_de   |           | 953       | 913       | 468       | 627       | 8.379099 | 8.55225  | 4.189126 | 6.749623 |
| ENSMUSG1 | 5296.365 | 6115.007 | 3820.681 | 4548.517 | 0.41024    | 0.002254 | 0.022754 | Chd5     | chr4  | +      | 1.52E+08 | 1.52E+08 | 9486      | protein_co chromodo     |           | 5857      | 6320      | 3752      | 4109      | 24.00575 | 27.59703 | 16.72814 | 20.61977 |
| ENSMUSG1 | 1108.647 | 1389.422 | 571.2692 | 571.6289 | 0.78348    | 5.13E-06 | 0.000308 | Polr2a   | chr11 | -      | 69733997 | 69758637 | 6240      | protein_co polymeras    |           | 1226      | 1436      | 561       | 679       | 7.072187 | 8.825167 | 3.52023  | 4.795574 |
| ENSMUSG1 | 484.6938 | 500.2308 | 284.1072 | 358.6565 | 0.50598    | 0.006711 | 0.048491 | Msh6     | chr17 | +      | 87975050 | 87990883 | 4754      | protein_co zinc_hom     |           | 536       | 517       | 279       | 324       | 4.898809 | 5.034095 | 2.773797 | 3.625586 |
| ENSMUSG1 | 4004.15  | 4552.39  | 2811.541 | 2947.847 | 0.52938    | 2.91E-05 | 0.001115 | Celf1    | chr2  | +      | 90940382 | 91019497 | 7851      | protein_co CUGBP_El     |           | 4428      | 4705      | 2762      | 2663      | 21.92834 | 24.8235  | 14.87337 | 16.14644 |
| ENSMUSG1 | 442.1927 | 474.1065 | 276.979  | 283.3829 | 0.58588    | 0.001494 | 0.01716  | Igf1r    | chr7  | +      | 67952859 | 68226780 | 4489      | protein_co insulin-like |           | 489       | 490       | 272       | 256       | 4.235283 | 4.52144  | 2.562638 | 2.714695 |
| ENSMUSG1 | 903.3752 | 1005.299 | 596.7269 | 566.7658 | 0.62905    | 6.41E-05 | 0.00194  | Insr     | chr8  | -      | 3150922  | 3279617  | 9355      | protein_co nuclear_rec  |           | 999       | 1039      | 586       | 512       | 4.151881 | 4.600448 | 2.649243 | 2.652595 |
| ENSMUSG1 | 1406.155 | 1198.812 | 724.015  | 872.2881 | 0.62205    | 8.56E-05 | 0.002369 | Adcy9</  |       |        |          |          |           |                         |           |           |           |           |           |          |          |          |          |

|          |          |          |          |          |         |          |          |          |       |   |          |          |       |                         |       |       |       |       |           |          |          |          |
|----------|----------|----------|----------|----------|---------|----------|----------|----------|-------|---|----------|----------|-------|-------------------------|-------|-------|-------|-------|-----------|----------|----------|----------|
| ENSMUSGI | 3650.576 | 4037.646 | 2574.276 | 3151.528 | 0.38814 | 0.004754 | 0.038167 | Ap3d1    | chr10 | - | 80706978 | 80742211 | 4730  | protein_co adaptor-re   | 4037  | 4173  | 2528  | 2847  | 33.18339  | 36.54396 | 22.60393 | 28.65214 |
| ENSMUSGI | 1657.544 | 1954.48  | 1006.086 | 1053.83  | 0.73062 | 4.52E-07 | 4.96E-05 | Vps13d   | chr4  | - | 1.45E+08 | 1.45E+08 | 15849 | protein_co vacuolar_f   | 1833  | 2020  | 988   | 952   | 4.496595  | 5.279319 | 2.636472 | 2.85934  |
| ENSMUSGI | 1874.571 | 2105.42  | 1236.223 | 1315.074 | 0.58489 | 2.28E-05 | 0.009932 | Cpeb4    | chr11 | + | 31872211 | 31935634 | 6303  | protein_co cytoplasm    | 2073  | 2176  | 1214  | 1188  | 12.78719  | 14.30013 | 8.145906 | 8.972219 |
| ENSMUSGI | 20886.14 | 21966.61 | 15339.75 | 16259.1  | 0.41518 | 0.000193 | 0.004127 | Sptbn1   | chr11 | - | 30099395 | 30268175 | 9107  | protein_co spectrin_b   | 23097 | 22703 | 15064 | 14688 | 98.60602  | 103.261  | 69.95729 | 76.77468 |
| ENSMUSGI | 26984.6  | 25345.35 | 19471.01 | 18976.69 | 0.42065 | 0.000135 | 0.003184 | Cyfp2    | chr11 | - | 46193850 | 46312859 | 6659  | protein_co cytoplasm    | 29841 | 26195 | 19121 | 17143 | 174.2318  | 162.9438 | 121.4422 | 122.5486 |
| ENSMUSGI | 2077.13  | 1915.777 | 1412.389 | 1542.002 | 0.39792 | 0.00336  | 0.030221 | Jade2    | chr11 | - | 51813455 | 51857653 | 6273  | protein_co jade_famil   | 2297  | 1980  | 1387  | 1393  | 14.23669  | 13.07429 | 9.35124  | 10.57077 |
| ENSMUSGI | 4936.462 | 5025.529 | 3488.714 | 3671.801 | 0.4465  | 0.000156 | 0.003522 | Rock2    | chr12 | + | 16894978 | 16988274 | 8012  | protein_co Rho-associ   | 5459  | 5194  | 3426  | 3317  | 26.49082  | 26.85279 | 18.08483 | 19.70767 |
| ENSMUSGI | 4656.135 | 4783.638 | 3160.819 | 3626.416 | 0.44196 | 0.00043  | 0.007263 | Fam49a   | chr12 | + | 12262139 | 12376359 | 4846  | protein_co family_wit   | 5149  | 4944  | 3104  | 3276  | 41.31071  | 42.25941 | 27.08983 | 32.18038 |
| ENSMUSGI | 7194.448 | 8009.498 | 5091.526 | 6206.75  | 0.39393 | 0.002933 | 0.027331 | Nrcam    | chr12 | + | 44328885 | 44601846 | 7572  | protein_co neuronal_l   | 7956  | 8278  | 5000  | 5607  | 40.85144  | 45.62383 | 27.9272  | 35.24931 |
| ENSMUSGI | 2949.76  | 3206.508 | 1918.487 | 2167.437 | 0.54443 | 3.59E-05 | 0.0013   | Ncoa1    | chr12 | - | 4247363  | 4477182  | 7328  | protein_co nuclear_re   | 3262  | 3314  | 1884  | 1958  | 17.307    | 18.73249 | 10.87335 | 12.71915 |
| ENSMUSGI | 908.8009 | 965.6292 | 502.0245 | 640.9325 | 0.61664 | 0.000225 | 0.004647 | Adcy3    | chr12 | + | 4133103  | 4213525  | 5621  | protein_co adenylate    | 1005  | 998   | 493   | 579   | 6.951454  | 7.354368 | 3.70938  | 4.903382 |
| ENSMUSGI | 1013.697 | 1057.548 | 629.3126 | 636.5046 | 0.63307 | 2.95E-05 | 0.00112  | Ndmt3a   | chr12 | + | 3806007  | 3914443  | 9685  | protein_co DNA_met      | 1121  | 1093  | 618   | 575   | 4.500173  | 4.674664 | 2.698714 | 2.826174 |
| ENSMUSGI | 1480.306 | 1799.67  | 891.0171 | 1050.509 | 0.67016 | 1.50E-05 | 0.000691 | Nf1      | chr11 | + | 79339693 | 79581612 | 11917 | protein_co neurofibro   | 1637  | 1860  | 875   | 949   | 5.340783  | 6.465087 | 3.10534  | 3.790792 |
| ENSMUSGI | 993.8032 | 1232.677 | 608.9465 | 650.8952 | 0.71746 | 9.22E-06 | 0.00049  | Helz     | chr11 | + | 1.08E+08 | 1.08E+08 | 13147 | protein_co helicase_w   | 1099  | 1274  | 598   | 588   | 3.250081  | 4.013942 | 1.923723 | 2.129028 |
| ENSMUSGI | 11822.55 | 11543.04 | 8915.262 | 9125.816 | 0.35265 | 0.001467 | 0.017037 | Pafah1b1 | chr11 | - | 74673949 | 74724670 | 8570  | protein_co platelet-ac  | 13074 | 11930 | 8755  | 8244  | 59.31313  | 57.66177 | 43.20593 | 45.79182 |
| ENSMUSGI | 3208.384 | 3355.513 | 2145.569 | 2240.496 | 0.54099 | 1.31E-05 | 0.000638 | Ube2o    | chr11 | - | 1.17E+08 | 1.17E+08 | 5205  | protein_co ubiquitin-c  | 3548  | 3468  | 2107  | 2024  | 26.50245  | 27.59858 | 17.12032 | 18.5106  |
| ENSMUSGI | 4237.563 | 2305.706 | 1352.309 | 1493.295 | 0.64935 | 1.02E-06 | 8.76E-05 | Cpd      | chr11 | - | 76778424 | 76847018 | 7946  | protein_co carboxype    | 2585  | 2383  | 1328  | 1349  | 12.64839  | 12.42235 | 7.068342 | 8.08154  |
| ENSMUSGI | 2362.774 | 4458.537 | 2641.484 | 2745.272 | 0.64947 | 7.23E-08 | 1.10E-05 | Pprf8    | chr11 | + | 75486816 | 75509449 | 7442  | protein_co pre-mRNA     | 4714  | 4608  | 2594  | 2480  | 24.62766  | 25.64786 | 14.74173 | 15.86327 |
| ENSMUSGI | 1511.051 | 1262.671 | 865.5594 | 961.9522 | 0.53566 | 0.000454 | 0.007502 | Cacna1g  | chr11 | - | 94408391 | 94474198 | 8383  | protein_co calcium_cf   | 1671  | 1305  | 850   | 869   | 7.749972  | 6.448214 | 4.288323 | 4.934589 |
| ENSMUSGI | 2461.449 | 2394.722 | 1435.81  | 1725.758 | 0.56384 | 5.11E-05 | 0.001634 | Nr1d1    | chr11 | - | 98767932 | 98775333 | 2721  | protein_co nuclear_re   | 2722  | 2475  | 1410  | 1559  | 38.89401  | 37.67689 | 21.9586  | 27.27397 |
| ENSMUSGI | 4667.691 | 5198.723 | 2787.101 | 3020.906 | 0.70983 | 1.54E-08 | 3.61E-06 | Mylh10   | chr11 | + | 68691559 | 68816632 | 7791  | protein_co myosin_he    | 5162  | 5373  | 2737  | 2729  | 25.450173 | 28.56617 | 14.85763 | 16.7405  |
| ENSMUSGI | 3718.397 | 4036.678 | 2394.036 | 2754.128 | 0.54523 | 2.88E-05 | 0.001105 | Sel1     | chr12 | - | 91806043 | 91849157 | 6300  | protein_co sel-1_supp   | 4112  | 4172  | 2351  | 2488  | 25.37673  | 27.4304  | 15.78266 | 18.79925 |
| ENSMUSGI | 2670.337 | 2810.774 | 1792.217 | 1927.225 | 0.51736 | 5.60E-05 | 0.001758 | Ralgap1  | chr12 | - | 55602929 | 55821167 | 7874  | protein_co Ral_GTPas    | 2953  | 2905  | 1760  | 1741  | 14.58113  | 15.28196 | 9.45334  | 10.52529 |
| ENSMUSGI | 2060.853 | 2074.458 | 1413.408 | 1652.698 | 0.39375 | 0.00435  | 0.03599  | Ppp2r5e  | chr12 | - | 75450883 | 75596200 | 4808  | protein_co protein_ph   | 2279  | 2144  | 1388  | 1493  | 18.42905  | 18.47093 | 12.20936 | 14.78176 |
| ENSMUSGI | 1917.073 | 2243.782 | 1313.614 | 1342.748 | 0.58858 | 2.55E-05 | 0.001017 | Akap5    | chr12 | + | 76324891 | 76334153 | 6687  | protein_co A_kinase_l   | 2120  | 2319  | 1290  | 1213  | 12.32616  | 14.36474 | 8.158802 | 8.634957 |
| ENSMUSGI | 4913.855 | 4569.806 | 3741.253 | 3670.694 | 0.33271 | 0.005359 | 0.041604 | Sptb     | chr12 | - | 76580488 | 76710547 | 10394 | protein_co spectrin_b   | 5434  | 4723  | 3674  | 3316  | 20.32638  | 18.82191 | 14.94942 | 15.18667 |
| ENSMUSGI | 5986.33  | 6574.6   | 4177.088 | 5090.93  | 0.40325 | 0.002372 | 0.023569 | Trim9    | chr12 | - | 70244539 | 70347614 | 4843  | protein_co tripartite_l | 6620  | 6795  | 4102  | 4599  | 53.14552  | 58.11702 | 35.82195 | 45.20429 |
| ENSMUSGI | 2796.032 | 2881.407 | 1630.307 | 1884.054 | 0.63574 | 1.82E-06 | 0.000142 | Trcnx    | chr12 | + | 81860030 | 82000924 | 12139 | protein_co peccanex_h   | 3092  | 2978  | 1601  | 1702  | 9.903296  | 10.16179 | 5.577974 | 6.674325 |
| ENSMUSGI | 1003.75  | 1000.462 | 703.6489 | 709.5643 | 0.45047 | 0.002682 | 0.025686 | Unc79    | chr12 | + | 1.03E+08 | 1.03E+08 | 8874  | protein_co unc-79_ho    | 1110  | 1034  | 691   | 641   | 4.863252  | 4.826469 | 3.293265 | 3.438502 |
| ENSMUSGI | 1502.913 | 1895.459 | 911.3832 | 969.7009 | 0.75774 | 7.80E-07 | 7.48E-05 | Ylpm1    | chr12 | + | 84996321 | 85070515 | 7003  | protein_co YLP_motif    | 1662  | 1959  | 895   | 876   | 9.227203  | 11.5872  | 5.40514  | 5.954574 |
| ENSMUSGI | 1993.032 | 1816.118 | 1204.655 | 1558.606 | 0.4126  | 0.006743 | 0.048617 | Tecpr2   | chr12 | + | 1.11E+08 | 1.11E+08 | 7830  | protein_co tectonin_b   | 2204  | 1877  | 1183  | 1408  | 10.94392  | 9.92958  | 6.389855 | 8.559957 |
| ENSMUSGI | 1814.889 | 2118.966 | 962.2984 | 788.1588 | 1.0379  | 1.11E-11 | 1.28E-08 | Ryr2     | chr13 | - | 11553103 | 12106945 | 16813 | protein_co ryanodine    | 2007  | 2190  | 945   | 712   | 6.441147  | 5.395445 | 2.377139 | 2.015884 |
| ENSMUSGI | 2720.073 | 2262.165 | 1906.267 | 1833.133 | 0.37729 | 0.006448 | 0.047118 | Hivep1   | chr13 | + | 42052021 | 42185026 | 8753  | protein_co human_im     | 3008  | 2338  | 1872  | 1656  | 13.36116  | 11.0649  | 9.045174 | 9.006045 |
| ENSMUSGI | 2031.916 | 2293.128 | 1092.642 | 1217.661 | 0.82157 | 5.13E-09 | 1.71E-06 | Nsd1     | chr13 | + | 55209782 | 55318325 | 12784 | protein_co nuclear_re   | 2247  | 2370  | 1073  | 1100  | 6.833756  | 7.679094 | 3.549776 | 4.095969 |
| ENSMUSGI | 1162.903 | 1391.358 | 811.5893 | 884.4647 | 0.5242  | 0.000655 | 0.009767 | Ddx46    | chr13 | + | 55635027 | 55681256 | 5676  | protein_co DEAD_(Asp    | 1286  | 1438  | 797   | 799   | 8.808902  | 10.49409 | 5.938598 | 6.70093  |
| ENSMUSGI | 1609.618 | 1620.67  | 1102.825 | 1268.581 | 0.40448 | 0.00432  | 0.035832 | Jmy      | chr13 | - | 93430097 | 93499808 | 8780  | protein_co junction-m   | 1780  | 1675  | 1083  | 1146  | 7.882222  | 7.902212 | 5.216773 | 6.213278 |
| ENSMUSGI | 1622.277 | 1885.783 | 1225.021 | 1361.566 | 0.39695 | 0.005894 | 0.044072 | Kif2a    | chr13 | - | 1.07E+08 | 1.07E+08 | 5304  | protein_co kinesin_fai  | 1794  | 1949  | 1203  | 1230  | 13.15049  | 15.22077 | 9.592463 | 11.03907 |
| ENSMUSGI | 1074.284 | 891.1268 | 566.1777 | 670.8205 | 0.57872 | 0.000493 | 0.008021 | Pde4d    | chr13 | + | 1.08E+08 | 1.1E+08  | 4207  | protein_co phosphodi    | 1188  | 921   | 556   | 606   | 10.97911  | 9.068083 | 5.589466 | 6.658949 |
| ENSMUSGI | 4181.388 | 4295.986 | 2267.766 | 3294.327 | 0.53737 | 0.00058  | 0.008907 | Rasgrf2  | chr13 | - | 91880400 | 92131656 | 5797  | protein_co RAS_prot     | 4624  | 4440  | 2227  | 2976  | 31.01257  | 31.72547 | 16.24744 | 24.4377  |
| ENSMUSGI | 771.3504 | 764.3758 | 407.3221 | 557.9101 | 0.56424 | 0.001518 | 0.017243 | Hcn1     | chr13 | + | 1.18E+08 | 1.18E+08 | 3525  | protein_co hyperpolar   | 853   | 790   | 400   | 504   | 9.408342  | 9.283171 | 4.799201 | 6.806616 |
| ENSMUSGI | 984.7604 | 1056.58  | 696.5208 | 612.1514 | 0.56634 | 0.000284 | 0.005496 | Kat6b    | chr14 | + | 21481434 | 21672478 | 7660  | protein_co K(lysine)_a  | 1089  | 1092  | 684   | 553   | 5.527418  | 5.905032 | 3.776551 | 3.436585 |
| ENSMUSGI | 2276.072 | 2436.327 | 1507.092 | 1729.079 | 0.49596 | 0.000269 | 0.005313 | Zswim8   | chr14 | + | 20707552 | 20723618 | 6072  | protein_co zinc_finger  | 2517  | 2518  | 1480  | 1562  | 16.11664  | 17.10732 | 10.30856 | 12.2456  |
| ENSMUSGI | 392.4573 | 416.0527 | 226.0638 | 232.4626 | 0.66162 | 0.000544 | 0.008454 | Atp8a2   | chr14 | - | 59647531 | 60197179 | 3895  | protein_co ATPase_ar    | 434   | 430   | 222   | 210   | 4.33217   | 4.572875 | 2.410536 | 2.566508 |
| ENSMUSGI | 728.8493 | 1046.905 | 531.5553 | 452.7485 | 0.70336 | 0.000132 | 0.003159 | Zc3h13   | chr14 | + | 75284373 | 75344426 | 6151  | protein_co zinc_finger  | 806   | 1082  | 522   | 409   | 5.094628  | 7.286348 | 3.58916  | 3.165252 |
| ENSMUSGI | 5863.348 | 6587.178 | 4130.246 | 4590.582 | 0.47706 | 0.00014  | 0.003269 | Akap11   | chr14 | - | 78492246 | 78536860 | 9416  | protein_co A_kinase_l   | 6484  | 6808  | 4056  | 4147  | 26.77317  | 29.94894 | 18.21795 | 20.96517 |
| ENSMUSGI | 1014.602 | 973.3697 | 634.4042 | 598.8678 | 0.61154 | 6.75E-05 | 0.001997 | Nipbl    | chr15 | - | 8291225  | 8444663  | 8815  | protein_co Kinesin-B    | 1122  | 1006  | 623   | 541   | 4.94873   | 4.727201 | 2.889054 | 2.921498 |
| ENSMUSGI | 1235.246 | 1302.342 | 721.9784 | 954.2034 | 0.52307 | 0.001225 | 0.015011 | Slc7a8   | chr14 | - | 54722216 | 54781886 | 4033  | protein_co solute_car   | 1366  | 1346  | 709   | 862   | 13.16878  | 13.82437 | 7.435087 | 10.17442 |
| ENSMUSGI | 1577.063 | 1560.681 | 1194.472 | 1166.741 | 0.37496 | 0.005954 | 0.044357 | Pdzd2    | chr15 | - | 12359711 | 12739924 | 10756 | protein_co PDZ_doma     | 1744  | 1613  | 1173  | 1054  | 6.304039  | 6.211721 | 4.612276 | 4.664666 |
| ENSMUSGI | 735.1792 | 790.500  |          |          |         |          |          |          |       |   |          |          |       |                         |       |       |       |       |           |          |          |          |

|          |           |          |          |          |         |          |          |          |       |   |          |          |       |                         |       |       |       |       |          |          |          |          |
|----------|-----------|----------|----------|----------|---------|----------|----------|----------|-------|---|----------|----------|-------|-------------------------|-------|-------|-------|-------|----------|----------|----------|----------|
| ENSMUSGI | 1588.819  | 1614.865 | 1046.818 | 1125.783 | 0.51062 | 0.000228 | 0.004656 | Gbf1     | chr19 | + | 46152509 | 46286510 | 6450  | protein_cogolgi-speci   | 1757  | 1669  | 1028  | 1017  | 10.59096 | 10.71828 | 6.740645 | 7.505713 |
| ENSMUSGI | 5979.096  | 6858.096 | 4353.255 | 4463.281 | 0.50472 | 4.19E-05 | 0.001473 | Huwe1    | chrX  | + | 1.52E+08 | 1.52E+08 | 14579 | protein_coHECT_UBA      | 6612  | 7088  | 4275  | 4032  | 17.63308 | 20.13837 | 12.40156 | 13.16508 |
| ENSMUSGI | 954.0149  | 1073.996 | 676.1547 | 773.7682 | 0.42691 | 0.006642 | 0.004815 | Fam120c  | chrX  | + | 1.51E+08 | 1.51E+08 | 5823  | protein_co family_wit   | 1055  | 1110  | 664   | 699   | 7.044154 | 7.895953 | 4.82269  | 5.714275 |
| ENSMUSGI | 2499.429  | 3240.373 | 1737.229 | 2190.683 | 0.48319 | 0.002027 | 0.021053 | Tro      | chrX  | - | 1.51E+08 | 1.51E+08 | 6610  | protein_cttrophinin     | 2764  | 3349  | 1706  | 1979  | 16.25772 | 20.9866  | 10.91555 | 14.25197 |
| ENSMUSGI | 2177.505  | 2194.436 | 1236.223 | 1436.84  | 0.64749 | 2.70E-06 | 0.000184 | Ptpnj    | chr2  | - | 90429754 | 90580647 | 7634  | protein_co protein_ty   | 2408  | 2268  | 1214  | 1298  | 12.26387 | 12.30607 | 6.725655 | 8.093815 |
| ENSMUSGI | 1601.479  | 2138.317 | 1261.68  | 1328.357 | 0.46839 | 0.00265  | 0.025453 | Farp1    | chr14 | + | 1.21E+08 | 1.21E+08 | 4885  | protein_co FERM_Rhc     | 1771  | 2210  | 1239  | 1200  | 14.09539 | 18.73942 | 10.72691 | 11.69358 |
| ENSMUSGI | 1632.225  | 1902.232 | 1257.607 | 1271.902 | 0.43751 | 0.00199  | 0.020752 | Dock9    | chr14 | - | 1.22E+08 | 1.22E+08 | 7910  | protein_co dedicator_   | 1805  | 1966  | 1235  | 1149  | 8.872048 | 10.29521 | 6.603262 | 6.914715 |
| ENSMUSGI | 1272.321  | 1736.778 | 930.731  | 880.0368 | 0.63736 | 9.68E-05 | 0.002259 | Tnrc6c   | chr11 | + | 1.18E+08 | 1.18E+08 | 11590 | protein_co trinucleotid | 1407  | 1795  | 914   | 795   | 4.719911 | 6.415188 | 3.335268 | 3.265235 |
| ENSMUSGI | 6139.154  | 6251.433 | 4180.143 | 3892.087 | 0.57965 | 8.26E-07 | 7.55E-05 | Gaa      | chr11 | + | 1.19E+08 | 1.19E+08 | 3633  | protein_coglucosidasi   | 6789  | 6461  | 4105  | 3516  | 72.65468 | 73.66526 | 47.78766 | 46.06957 |
| ENSMUSGI | 10145.11  | 9070.916 | 6903.091 | 7704.473 | 0.36883 | 0.002592 | 0.025108 | Nptx1    | chr11 | - | 1.2E+08  | 1.2E+08  | 5217  | protein_co neuronal_l   | 11219 | 9375  | 6779  | 6960  | 83.60967 | 74.43528 | 54.95571 | 63.50664 |
| ENSMUSGI | 4884.014  | 4905.551 | 3199.515 | 3364.065 | 0.54038 | 5.03E-06 | 0.000304 | Cnksr2   | chrX  | - | 1.58E+08 | 1.58E+08 | 5738  | protein_co connector_   | 5401  | 5070  | 3142  | 3039  | 36.59627 | 36.59955 | 23.15867 | 25.21163 |
| ENSMUSGI | 4170.537  | 3942.825 | 2860.419 | 3084.003 | 0.41821 | 0.000662 | 0.049837 | Hspa4l   | chr3  | + | 40744495 | 40796103 | 9479  | protein_co heat_shoc    | 4612  | 4075  | 2809  | 2786  | 11.76445 | 17.80711 | 12.53306 | 13.99102 |
| ENSMUSGI | 718.9022  | 712.1274 | 496.933  | 469.353  | 0.49276 | 0.002598 | 0.025135 | Nrp1     | chr8  | + | 1.28E+08 | 1.29E+08 | 5907  | protein_co neuropilin_  | 795   | 736   | 488   | 424   | 5.23267  | 5.161064 | 3.493984 | 3.416879 |
| ENSMUSGI | 1308.492  | 960.7914 | 727.0699 | 725.0618 | 0.55507 | 0.000965 | 0.012626 | Pikfyve  | chr1  | + | 65186683 | 65278695 | 11237 | protein_co phosphoin    | 1447  | 993   | 714   | 655   | 5.006582 | 3.660389 | 2.687298 | 2.774736 |
| ENSMUSGI | 6319.105  | 6493.324 | 4778.906 | 5312.323 | 0.3223  | 0.007021 | 0.049686 | Slc39a10 | chr1  | - | 46807544 | 46892852 | 5498  | protein_co solute_car   | 6988  | 6711  | 4693  | 4799  | 49.41643 | 50.56044 | 36.10055 | 41.55055 |
| ENSMUSGI | 996.516   | 1099.153 | 525.4455 | 582.2634 | 0.81061 | 2.65E-07 | 3.14E-05 | Raph1    | chr1  | - | 60482292 | 60567104 | 10024 | protein_co Ras_associ   | 1102  | 1136  | 516   | 526   | 4.274287 | 4.694244 | 2.177091 | 2.497902 |
| ENSMUSGI | 827.4158  | 935.6347 | 603.855  | 636.5046 | 0.44582 | 0.004993 | 0.003567 | Als2     | chr1  | - | 59162926 | 59237231 | 6342  | protein_co amyotropl    | 915   | 967   | 593   | 575   | 5.609421 | 6.315804 | 3.954545 | 4.315909 |
| ENSMUSGI | 1308.145  | 1433.93  | 799.3696 | 884.4647 | 0.65905 | 5.95E-06 | 0.039345 | Tmem131  | chr1  | - | 36792194 | 36943666 | 6543  | protein_co transmeml    | 1506  | 1482  | 785   | 799   | 8.948832 | 9.382091 | 5.07412  | 5.813003 |
| ENSMUSGI | 4864.119  | 4735.26  | 3055.934 | 2685.496 | 0.6885  | 3.88E-08 | 7.43E-06 | Dst      | chr1  | + | 33908225 | 34308661 | 24236 | protein_co dystonin     | 5379  | 4894  | 3001  | 2426  | 8.629066 | 8.364335 | 5.236886 | 4.764974 |
| ENSMUSGI | 557.9405  | 692.7761 | 344.1872 | 365.2983 | 0.68369 | 0.000147 | 0.003377 | Zfp142   | chr1  | - | 74565127 | 74588246 | 7473  | protein_co zinc_finger  | 617   | 716   | 338   | 330   | 3.210062 | 3.968683 | 1.912889 | 2.102082 |
| ENSMUSGI | 4170.537  | 2488.576 | 1536.623 | 1917.263 | 0.39686 | 0.006818 | 0.049577 | Agfg1    | chr1  | + | 82839483 | 82901182 | 8044  | protein_co ArfGAP_w     | 2434  | 2572  | 1509  | 1732  | 11.76445 | 13.24425 | 7.933872 | 10.24959 |
| ENSMUSGI | 3902.87   | 4385.002 | 2668.978 | 3230.123 | 0.44831 | 0.001037 | 0.013186 | Sphkap   | chr1  | - | 83254139 | 83408200 | 8154  | protein_co SPHK1_int    | 4316  | 4532  | 2621  | 2918  | 20.57946 | 23.02224 | 13.59453 | 17.03512 |
| ENSMUSGI | 2993.1357 | 3397.118 | 2005.043 | 2269.277 | 0.53164 | 7.63E-05 | 0.002169 | Trip12   | chr1  | - | 84721189 | 84840516 | 9632  | protein_co thyroid_hc   | 3308  | 3511  | 1969  | 2050  | 13.3528  | 15.09881 | 8.645642 | 10.13137 |
| ENSMUSGI | 4620.868  | 5059.394 | 3757.546 | 3800.209 | 0.33363 | 0.005625 | 0.042777 | Ncl      | chr1  | - | 86344719 | 86359400 | 8202  | protein_co nucleolin    | 5110  | 5229  | 3690  | 3433  | 24.2228  | 26.4075  | 19.02719 | 19.24238 |
| ENSMUSGI | 3562.861  | 2701.44  | 2056.977 | 2008.034 | 0.56051 | 0.00014  | 0.003265 | Epha4    | chr1  | - | 77367185 | 77515088 | 6328  | protein_co Eph_recep    | 3940  | 2792  | 2020  | 1814  | 24.20767 | 18.27584 | 13.5006  | 13.64588 |
| ENSMUSGI | 2581.718  | 2368.598 | 1932.743 | 1847.524 | 0.35903 | 0.005699 | 0.043122 | Ptnp1    | chr1  | - | 1.2E+08  | 1.2E+08  | 10874 | protein_co proteofas    | 2855  | 2448  | 1898  | 1669  | 10.20798 | 9.325035 | 7.382015 | 7.360304 |
| ENSMUSGI | 3232.799  | 3309.07  | 2399.127 | 2650.073 | 0.34685 | 0.005846 | 0.043851 | Xpr1     | chr1  | - | 1.33E+08 | 1.33E+08 | 9739  | protein_co neurofasci   | 3625  | 3226  | 2094  | 1875  | 14.47161 | 13.72077 | 9.093485 | 9.164687 |
| ENSMUSGI | 705.338   | 697.6139 | 431.7614 | 456.0694 | 0.57225 | 0.000542 | 0.008434 | Lamc1    | chr1  | - | 1.55E+08 | 1.55E+08 | 7472  | protein_co xenotropic   | 3575  | 3420  | 2356  | 2394  | 18.60212 | 18.9591  | 13.33541 | 15.25169 |
| ENSMUSGI | 6190.698  | 5960.196 | 4685.222 | 4592.796 | 0.36588 | 0.001532 | 0.017359 | Cdc42bpa | chr1  | + | 1.53E+08 | 1.53E+08 | 7622  | protein_co laminin_ga   | 780   | 721   | 424   | 412   | 3.97877  | 3.918273 | 2.352691 | 2.573114 |
| ENSMUSGI | 873.534   | 993.6886 | 706.7038 | 609.9375 | 0.44028 | 0.006305 | 0.043633 | Ahctf1   | chr1  | - | 1.8E+08  | 1.8E+08  | 9161  | protein_co CDC42Bir     | 6846  | 6160  | 4601  | 4149  | 29.05477 | 27.85263 | 21.24112 | 21.55913 |
| ENSMUSGI | 5521.531  | 7139.657 | 3639.423 | 4458.853 | 0.57851 | 9.07E-05 | 0.002485 | Astn1    | chr1  | + | 1.58E+08 | 1.59E+08 | 8506  | protein_co AT_hook_     | 966   | 1027  | 694   | 551   | 4.41545  | 5.001191 | 3.45066  | 3.083592 |
| ENSMUSGI | 1296.737  | 1590.676 | 877.7791 | 1074.863 | 0.49525 | 0.001929 | 0.020298 | Abi2     | chr1  | + | 1.57E+08 | 1.57E+08 | 7224  | protein_co astrotract   | 6106  | 7379  | 3574  | 4028  | 32.86262 | 42.3105  | 20.92401 | 26.54254 |
| ENSMUSGI | 5581.213  | 4949.092 | 3909.274 | 4158.866 | 0.3576  | 0.003898 | 0.033342 | Lpgat1   | chr1  | + | 1.92E+08 | 1.92E+08 | 10151 | protein_co cv-abl_Abel  | 1434  | 1644  | 862   | 971   | 5.492417 | 6.708437 | 3.591422 | 4.553456 |
| ENSMUSGI | 2328.52   | 2672.413 | 1392.023 | 1432.412 | 0.75418 | 2.71E-08 | 5.49E-06 | Plxna2   | chr1  | + | 1.95E+08 | 1.95E+08 | 7233  | protein_co lysophospl   | 6172  | 5115  | 3839  | 3757  | 33.1765  | 29.29244 | 22.44748 | 24.72598 |
| ENSMUSGI | 985.6647  | 945.3104 | 625.2394 | 694.0668 | 0.48711 | 0.001654 | 0.01826  | Frmd4a   | chr2  | + | 4017717  | 4614043  | 11036 | protein_co plexin_A2    | 2575  | 2762  | 1367  | 1294  | 9.071701 | 10.3667  | 5.238716 | 5.58153  |
| ENSMUSGI | 4340.542  | 5051.653 | 2981.598 | 3767     | 0.43166 | 0.002497 | 0.024366 | Uhmk1    | chr1  | - | 1.7E+08  | 1.7E+08  | 6761  | protein_co FERM_don     | 1090  | 977   | 614   | 627   | 6.268141 | 5.985659 | 3.840833 | 4.414559 |
| ENSMUSGI | 2764.382  | 3036.217 | 2006.061 | 2198.432 | 0.42815 | 0.001033 | 0.013173 | Rabgap1  | chr1  | - | 1.6E+08  | 1.61E+08 | 7864  | protein_co U2AF_hon     | 4800  | 5221  | 2928  | 3403  | 23.73127 | 27.50037 | 15.74692 | 20.59914 |
| ENSMUSGI | 3138.754  | 3734.978 | 2663.886 | 2337.909 | 0.41808 | 0.002415 | 0.023806 | Gad2     | chr2  | + | 22622205 | 22693874 | 6338  | protein_co RAB_GTPa     | 3057  | 3138  | 1970  | 1986  | 18.75281 | 20.50827 | 13.14565 | 14.91618 |
| ENSMUSGI | 3429.64   | 32517.62 | 16065.8  | 18378.93 | 0.4448  | 0.00151  | 0.034041 | Xtbp1    | chr2  | - | 32787602 | 32847239 | 5744  | protein_co glutamin_e   | 3471  | 3860  | 2616  | 2112  | 23.49435 | 27.83564 | 19.26155 | 17.50291 |
| ENSMUSGI | 3227.645  | 29231.09 | 20861    | 24014.49 | 0.4247  | 0.000454 | 0.007502 | Dnm1     | chr2  | - | 32308471 | 32353329 | 3886  | protein_co syntaxin_b   | 26905 | 24306 | 15777 | 16603 | 269.1866 | 259.0831 | 171.7077 | 203.3829 |
| ENSMUSGI | 2625.123  | 2309.576 | 1861.462 | 1706.939 | 0.42819 | 0.001551 | 0.010752 | Zeb2     | chr2  | - | 44983634 | 45117395 | 4605  | protein_co dynamin_1    | 35693 | 30211 | 20486 | 21694 | 301.3537 | 271.7464 | 188.1462 | 224.2543 |
| ENSMUSGI | 5482.647  | 5935.04  | 3385.865 | 4117.908 | 0.55677 | 2.70E-05 | 0.001507 | Slc4a10  | chr2  | + | 62046462 | 62326730 | 9113  | protein_co zinc_finger  | 2903  | 2387  | 1828  | 1542  | 12.38537 | 10.84974 | 8.483652 | 8.054781 |
| ENSMUSGI | 663.7412  | 680.1977 | 371.6814 | 418.4326 | 0.65693 | 0.000116 | 0.002927 | Notch1   | chr2  | - | 26457903 | 26516663 | 5482  | protein_co solute_car   | 6063  | 6134  | 3325  | 3720  | 43.00032 | 46.34829 | 25.65197 | 32.30239 |
| ENSMUSGI | 1147.531  | 1282.023 | 727.0699 | 794.8005 | 0.60207 | 6.71E-05 | 0.001199 | Sec16a   | chr2  | - | 26409431 | 26445216 | 9488  | protein_co notch_1      | 734   | 703   | 365   | 378   | 3.00777  | 3.069086 | 1.626995 | 1.896478 |
| ENSMUSGI | 2452.54   | 2672.413 | 1633.362 | 1784.427 | 0.53873 | 4.73E-05 | 0.001157 | Camsap1  | chr2  | - | 25926838 | 25983282 | 7971  | protein_co SEC16_hor    | 1269  | 1325  | 714   | 718   | 5.608545 | 6.238923 | 3.432667 | 3.885264 |
| ENSMUSGI | 5197.799  | 4450.796 | 3657.752 | 3345.247 | 0.4267  | 0.001014 | 0.013018 | Abca2    | chr2  | + | 25428703 | 25448540 | 7981  | protein_co calmodulin   | 2712  | 2767  | 1604  | 1612  | 13.2116  | 14.36085 | 8.499925 | 9.61476  |
| ENSMUSGI | 629.423   | 5941.813 | 4637.362 | 4752.199 | 0.35505 | 0.002232 | 0.022639 | Grim1    | chr2  | - | 25291181 | 25319187 | 8033  | protein_co ATP-bindin   | 5748  | 4600  | 3592  | 3022  | 27.82032 | 23.71966 | 18.91153 | 17.90801 |
| ENSMUSGI | 1985.945  | 373.4798 | 88.59255 | 161.6168 | 0.73037 | 0.002054 | 0.022631 | Irga4    | chr2  | + | 79255426 | 79333123 | 4276  | protein_co glutamate_   | 6922  | 6141  | 4554  | 4293  | 62.9386  | 59.48806 | 45.04259 | 47.79186 |
| ENSMUSGI | 773.159   | 980.1427 | 511.1892 | 587.7982 | 0.57589 | 0.00079  | 0.011078 | Cers6    | chr2  | + | 68861441 | 6        |       |                         |       |       |       |       |          |          |          |          |

|          |          |          |          |          |         |          |          |          |      |   |           |           |       |            |              |      |      |      |      |          |          |          |          |
|----------|----------|----------|----------|----------|---------|----------|----------|----------|------|---|-----------|-----------|-------|------------|--------------|------|------|------|------|----------|----------|----------|----------|
| ENSMUSGI | 1161.999 | 986.9156 | 719.9418 | 810.2981 | 0.43196 | 0.006152 | 0.045501 | Mtus2    | chr5 | + | 1.48E+08  | 1.48E+08  | 7543  | protein_co | microtubu    | 1285 | 1020 | 707  | 732  | 6.623418 | 5.601243 | 3.964088 | 4.619529 |
| ENSMUSGI | 2618.793 | 2835.931 | 1850.261 | 1874.091 | 0.50932 | 6.91E-05 | 0.002028 | Wasl     | chr6 | + | 2.4613805 | 2.4665009 | 4352  | protein_co | Wiskott-Al   | 2896 | 2931 | 1817 | 1693 | 25.87217 | 27.89686 | 17.6577  | 18.5182  |
| ENSMUSGI | 877.1511 | 920.1537 | 596.7269 | 666.3927 | 0.44887 | 0.004299 | 0.035745 | Glyf1    | chr5 | + | 1.38E+08  | 1.38E+08  | 5437  | protein_co | GRB10_int    | 970  | 951  | 586  | 602  | 6.936423 | 7.245186 | 4.558336 | 5.270695 |
| ENSMUSGI | 1112.264 | 1092.38  | 670.0448 | 783.7309 | 0.53335 | 0.000534 | 0.00837  | Zkscan1  | chr5 | + | 1.38E+08  | 1.38E+08  | 8261  | protein_co | zinc_finger  | 1230 | 1129 | 658  | 708  | 5.788895 | 5.660955 | 3.368692 | 4.079729 |
| ENSMUSGI | 1604.192 | 1990.28  | 847.23   | 1007.338 | 0.84305 | 7.10E-08 | 1.10E-05 | Plxna4   | chr6 | - | 32144268  | 32588192  | 12877 | protein_co | cplexin_A4   | 1774 | 2057 | 832  | 910  | 5.356266 | 6.616799 | 2.732604 | 3.364011 |
| ENSMUSGI | 4435.491 | 3631.269 | 2890.969 | 3157.063 | 0.3801  | 0.005274 | 0.041174 | Herc3    | chr6 | + | 58831465  | 58920398  | 4731  | protein_co | cell_dome    | 4905 | 3753 | 2839 | 2852 | 40.30967 | 32.85897 | 25.37935 | 28.69639 |
| ENSMUSGI | 1373.601 | 1598.416 | 993.8659 | 1119.141 | 0.44085 | 0.003054 | 0.028248 | Gfpt1    | chr6 | + | 87042846  | 87092197  | 6238  | protein_co | glutamine_   | 1519 | 1652 | 976  | 1011 | 9.467506 | 10.96966 | 6.617173 | 7.71501  |
| ENSMUSGI | 4496.982 | 5439.647 | 3254.504 | 4020.495 | 0.4069  | 0.004463 | 0.036544 | Prickle2 | chr6 | - | 92370892  | 92706145  | 7860  | protein_co | prickle_ho   | 4973 | 5622 | 3196 | 3632 | 24.59909 | 29.62761 | 17.19698 | 21.99652 |
| ENSMUSGI | 2667.625 | 3869.29  | 1716.863 | 2295.844 | 0.60259 | 0.000424 | 0.0072   | Chl1     | chr6 | + | 1.04E+08  | 1.04E+08  | 7751  | protein_co | cell_adhes   | 2950 | 3999 | 1686 | 2074 | 14.79747 | 21.37086 | 9.199577 | 12.73743 |
| ENSMUSGI | 1635.842 | 1551.973 | 911.3832 | 1206.591 | 0.52055 | 0.000932 | 0.012459 | Plxna1   | chr6 | - | 89316316  | 89362613  | 9025  | protein_co | cplexin_A1   | 1809 | 1604 | 895  | 1090 | 7.793177 | 7.361826 | 4.194149 | 5.749234 |
| ENSMUSGI | 393.3616 | 399.6041 | 233.1919 | 261.2436 | 0.5514  | 0.003964 | 0.03374  | Nup210   | chr6 | - | 91013068  | 91116829  | 7037  | protein_co | nucleopor    | 435  | 413  | 229  | 236  | 2.403394 | 2.431033 | 1.376309 | 1.596449 |
| ENSMUSGI | 2238.996 | 1948.675 | 1579.391 | 1391.454 | 0.449   | 0.001512 | 0.017229 | Slc6a6   | chr6 | + | 91684067  | 91759063  | 6169  | protein_co | solute_car   | 2476 | 2014 | 1551 | 1257 | 15.60483 | 13.523   | 10.63323 | 9.699542 |
| ENSMUSGI | 2175.696 | 2770.137 | 1423.591 | 1988.108 | 0.46402 | 0.005157 | 0.040582 | Plxnd1   | chr6 | - | 1.16E+08  | 1.16E+08  | 6907  | protein_co | cplexin_D1   | 2406 | 2863 | 1398 | 1796 | 13.54345 | 17.1696  | 8.560236 | 12.37792 |
| ENSMUSGI | 904.2795 | 918.2186 | 547.8482 | 574.5146 | 0.61823 | 7.35E-05 | 0.002123 | Lrp6     | chr6 | - | 1.34E+08  | 1.35E+08  | 9368  | protein_co | low_densit   | 1000 | 949  | 538  | 519  | 4.150269 | 4.196118 | 2.428865 | 2.637249 |
| ENSMUSGI | 2893.694 | 4851.368 | 1225.021 | 1461.193 | 1.2777  | 1.23E-12 | 3.17E-09 | Grin2b   | chr6 | - | 1.36E+08  | 1.36E+08  | 23640 | protein_co | glutamate    | 3200 | 5014 | 1203 | 1320 | 5.262907 | 8.785475 | 2.152218 | 2.658013 |
| ENSMUSGI | 1202.692 | 1302.342 | 740.3079 | 852.3627 | 0.58279 | 0.000117 | 0.002942 | Atf7ip   | chr6 | + | 1.37E+08  | 1.37E+08  | 8235  | protein_co | activating_  | 1330 | 1346 | 727  | 770  | 6.2793   | 6.77033  | 3.733695 | 4.451002 |
| ENSMUSGI | 7436.795 | 8006.595 | 5320.645 | 5768.392 | 0.44759 | 0.000161 | 0.003587 | Srgap3   | chr6 | - | 1.13E+08  | 1.13E+08  | 8887  | protein_co | SLIT-ROBO    | 8224 | 8275 | 5225 | 5211 | 35.97917 | 38.56925 | 24.86561 | 27.91236 |
| ENSMUSGI | 906.9923 | 817.5919 | 512.2075 | 587.7982 | 0.56544 | 0.000532 | 0.00837  | St8sia1  | chr6 | - | 1.43E+08  | 1.43E+08  | 8991  | protein_co | ST8_alpha    | 1003 | 845  | 503  | 531  | 4.337267 | 3.892934 | 2.366072 | 2.811365 |
| ENSMUSGI | 2496.716 | 1977.702 | 1522.366 | 1731.293 | 0.41163 | 0.005834 | 0.043851 | Tmtc1    | chr6 | - | 1.48E+08  | 1.48E+08  | 8383  | protein_co | transmeml    | 2761 | 2044 | 1495 | 1564 | 12.80531 | 10.09973 | 7.542403 | 8.881125 |
| ENSMUSGI | 6665.683 | 1415.547 | 1108.934 | 1043.868 | 0.4652  | 0.0015   | 0.017168 | Dennd5b  | chr6 | - | 1.49E+08  | 1.49E+08  | 9831  | protein_co | DENN/MA      | 1842 | 1463 | 1089 | 943  | 7.284758 | 6.164176 | 4.684877 | 4.566093 |
| ENSMUSGI | 1633.177 | 5995.996 | 4066.813 | 4907.174 | 0.38147 | 0.001587 | 0.01781  | Slc8a2   | chr7 | + | 16130300  | 16160509  | 4233  | protein_co | solute_car   | 7332 | 6197 | 4524 | 4433 | 67.34376 | 60.64034 | 45.20041 | 49.85172 |
| ENSMUSGI | 1594.245 | 2114.128 | 1071.257 | 1476.691 | 0.46321 | 0.006847 | 0.049088 | Nova2    | chr7 | + | 18925888  | 18965319  | 8372  | protein_co | neuro-onc    | 1763 | 2185 | 1052 | 1334 | 8.187405 | 10.81062 | 5.314404 | 7.58503  |
| ENSMUSGI | 3069.125 | 3734.998 | 1829.894 | 1983.68  | 0.76067 | 4.20E-08 | 7.62E-06 | Herc2    | chr7 | + | 56050155  | 56231794  | 15342 | protein_co | hect_(hom    | 3394 | 3860 | 1797 | 1792 | 8.601801 | 10.42158 | 4.95375  | 5.560153 |
| ENSMUSGI | 2464.162 | 2502.121 | 1735.192 | 1889.588 | 0.41967 | 0.001176 | 0.014562 | Tjp1     | chr7 | - | 65296165  | 65371239  | 7049  | protein_co | tight_junct  | 2725 | 2586 | 1704 | 1707 | 15.03011 | 15.196   | 10.22375 | 11.52754 |
| ENSMUSGI | 1521.902 | 1717.427 | 1094.678 | 1204.377 | 0.44724 | 0.001812 | 0.019422 | Fam189a1 | chr7 | - | 64756113  | 65156570  | 4779  | protein_co | family_wit   | 1683 | 1775 | 1075 | 1088 | 13.69211 | 15.38472 | 9.513481 | 10.83734 |
| ENSMUSGI | 3642.438 | 3808.333 | 2836.998 | 2967.772 | 0.33614 | 0.00566  | 0.042959 | Meif2a   | chr7 | - | 67231163  | 67372858  | 5538  | protein_co | myocyte_e    | 4028 | 3936 | 2086 | 2681 | 28.27872 | 29.43951 | 21.2763  | 23.04489 |
| ENSMUSGI | 1043.539 | 1300.406 | 737.253  | 877.8229 | 0.46783 | 0.004205 | 0.035269 | Sipa13   | chr7 | - | 29320372  | 29518641  | 7713  | protein_co | signal_inhu  | 1154 | 1344 | 724  | 793  | 5.817088 | 7.217991 | 3.969934 | 4.894187 |
| ENSMUSGI | 1426.049 | 1698.075 | 931.7493 | 773.7682 | 0.77062 | 8.26E-07 | 7.55E-05 | Smp1     | chr7 | - | 1.18E+08  | 1.18E+08  | 15557 | protein_co | SMG1_ho      | 1577 | 1755 | 915  | 699  | 3.941205 | 4.672826 | 2.487501 | 2.138858 |
| ENSMUSGI | 533.5249 | 719.8679 | 370.6631 | 426.1814 | 0.53692 | 0.003941 | 0.033627 | Xylt1    | chr7 | + | 1.17E+08  | 1.18E+08  | 3191  | protein_co | cxylosyltra  | 590  | 744  | 364  | 385  | 7.188667 | 9.657718 | 4.824392 | 5.743341 |
| ENSMUSGI | 8058.035 | 6676.194 | 5529.397 | 5626.701 | 0.37145 | 0.003688 | 0.032102 | Sez6l2   | chr7 | + | 1.27E+08  | 1.27E+08  | 3732  | protein_co | seizure_rel  | 8911 | 6900 | 5430 | 5083 | 92.8342  | 76.58361 | 61.53557 | 64.83495 |
| ENSMUSGI | 4702.253 | 6290.136 | 2715.82  | 3129.389 | 0.81618 | 4.08E-08 | 7.51E-06 | Pgm211   | chr7 | + | 1E+08     | 1E+08     | 5325  | protein_co | phosphogl    | 5200 | 6501 | 2667 | 2827 | 37.96705 | 50.56953 | 21.18222 | 25.27184 |
| ENSMUSGI | 2014.735 | 2017.372 | 1162.905 | 1665.982 | 0.44714 | 0.005683 | 0.043062 | Cckbr    | chr7 | + | 1.05E+08  | 1.05E+08  | 2484  | protein_co | cholecycto   | 2228 | 2085 | 1142 | 1505 | 34.8728  | 34.76825 | 19.44386 | 28.84135 |
| ENSMUSGI | 3126.094 | 3509.356 | 1655.764 | 1947.151 | 0.8043  | 4.76E-09 | 1.64E-06 | Usp9x    | chrX | + | 13071498  | 13173328  | 11887 | protein_co | ubiquitin_s  | 3457 | 3627 | 1626 | 1759 | 11.30708 | 12.63874 | 5.785172 | 7.04408  |
| ENSMUSGI | 778.5847 | 706.322  | 510.1709 | 506.9898 | 0.47527 | 0.003631 | 0.031824 | Trim66   | chr7 | - | 1.09E+08  | 1.1E+08   | 9250  | protein_co | tripartite_i | 861  | 730  | 501  | 458  | 3.618967 | 3.268959 | 2.290678 | 2.356972 |
| ENSMUSGI | 2743.584 | 3278.108 | 1771.851 | 2430.894 | 0.45725 | 0.003724 | 0.032286 | Usp11    | chrX | + | 20703906  | 20720539  | 3976  | protein_co | ubiquitin_s  | 3034 | 3388 | 1740 | 2196 | 29.66828 | 35.29599 | 18.50849 | 26.29158 |
| ENSMUSGI | 3756.377 | 3850.906 | 2348.212 | 2960.023 | 0.47316 | 0.00064  | 0.009587 | Magee1   | chrX | + | 1.05E+08  | 1.05E+08  | 3550  | protein_co | melanoma     | 4154 | 3980 | 2306 | 2674 | 45.49475 | 46.43902 | 47.27255 | 35.85616 |
| ENSMUSGI | 2550.068 | 3012.998 | 1485.707 | 1642.735 | 0.75562 | 5.91E-08 | 9.69E-06 | Atrx     | chrX | - | 1.06E+08  | 1.06E+08  | 10269 | protein_co | alpha_thal   | 2820 | 3114 | 1459 | 1484 | 10.67687 | 12.56676 | 6.008903 | 6.879177 |
| ENSMUSGI | 2626.932 | 3064.276 | 1706.68  | 2169.651 | 0.4966  | 0.000831 | 0.011458 | Pak3     | chrX | + | 1.44E+08  | 1.44E+08  | 8657  | protein_co | p21_prot     | 2905 | 3167 | 1676 | 1960 | 13.04674 | 15.15336 | 8.18794  | 10.77753 |
| ENSMUSGI | 327.3492 | 380.2528 | 213.8441 | 181.5422 | 0.65251 | 0.001242 | 0.015172 | Dcx      | chrX | - | 1.44E+08  | 1.44E+08  | 9074  | protein_co | doublecort   | 362  | 393  | 210  | 164  | 1.551076 | 1.793999 | 0.978788 | 0.860351 |
| ENSMUSGI | 1293.12  | 1167.85  | 665.9716 | 717.313  | 0.74188 | 8.80E-07 | 7.90E-05 | Cdkl5    | chrX | - | 1.61E+08  | 1.61E+08  | 3267  | protein_co | cyclin-dep   | 1430 | 1207 | 654  | 648  | 17.01806 | 15.30335 | 8.466358 | 9.441839 |
| ENSMUSGI | 881.6725 | 1094.315 | 606.9099 | 720.6339 | 0.49521 | 0.003102 | 0.028568 | Nlgn3    | chrX | + | 1.01E+08  | 1.01E+08  | 8541  | protein_co | neuroligin   | 975  | 1131 | 596  | 651  | 4.438325 | 5.485071 | 2.951247 | 3.628298 |
| ENSMUSGI | 1939.68  | 2149.828 | 1176.143 | 1305.111 | 0.65622 | 2.42E-06 | 0.000172 | Atp2b3   | chrX | + | 73503086  | 73571005  | 4637  | protein_co | ATPase_Ce    | 2145 | 2222 | 1155 | 1179 | 17.98512 | 19.84885 | 10.53448 | 12.1034  |
| ENSMUSGI | 2356.552 | 2628.872 | 1508.11  | 1646.056 | 0.60533 | 6.97E-06 | 0.00389  | Hcf1     | chrX | - | 73942792  | 73966357  | 8262  | protein_co | host_cell_l  | 2606 | 2717 | 1481 | 1487 | 12.62344 | 13.62175 | 7.581199 | 8.567547 |
| ENSMUSGI | 2233.57  | 2648.224 | 1157.813 | 1372.636 | 0.85195 | 6.74E-09 | 2.10E-06 | L1cam    | chrX | - | 73853778  | 73896105  | 5126  | protein_co | L1_cell_ad   | 2470 | 2737 | 1137 | 1240 | 18.73448 | 22.11692 | 9.381016 | 11.51526 |
| ENSMUSGI | 3322.323 | 3546.123 | 2288.132 | 2595.832 | 0.45447 | 0.00044  | 0.007363 | Mecp2    | chrX | - | 74026592  | 74135363  | 10507 | protein_co | methyl_Cp    | 3674 | 3665 | 2247 | 2345 | 13.59514 | 14.44853 | 9.044663 | 10.62417 |
| ENSMUSGI | 442.1927 | 487.6524 | 282.0705 | 301.0944 | 0.55582 | 0.0026   | 0.025135 | Col4a2   | chr8 | + | 11312805  | 11449287  | 6450  | protein_co | collagen_t   | 489  | 504  | 277  | 272  | 2.947626 | 3.236676 | 1.816302 | 2.007428 |
| ENSMUSGI | 1445.039 | 1444.574 | 1076.349 | 1058.258 | 0.39801 | 0.004071 | 0.034509 | Dlc1     | chr8 | - | 36567751  | 36953143  | 6241  | protein_co | deleted_in   | 1598 | 1493 | 1057 | 956  | 9.955103 | 9.909095 | 7.162899 | 7.291795 |
| ENSMUSGI | 1209.022 | 1421.352 | 827.8822 | 926.2593 | 0.51957 | 0.000673 | 0.009921 | Tnks     | chr8 | - | 34829179  | 34965690  | 6444  | protein_co |              |      |      |      |      |          |          |          |          |

|          |          |          |          |          |         |          |          |           |       |   |          |          |       |            |                |       |       |       |       |          |          |          |          |
|----------|----------|----------|----------|----------|---------|----------|----------|-----------|-------|---|----------|----------|-------|------------|----------------|-------|-------|-------|-------|----------|----------|----------|----------|
| ENSMUSGI | 15370.94 | 12954.72 | 10600.56 | 10890.32 | 0.37112 | 0.002552 | 0.024792 | Myo5a     | chr9  | + | 75071015 | 75223688 | 11702 | protein_co | myosin_Vf      | 16998 | 13389 | 10410 | 9838  | 56.47561 | 47.39324 | 37.62345 | 40.02003 |
| ENSMUSGI | 1808.559 | 2017.372 | 1195.49  | 1328.357 | 0.5454  | 0.000101 | 0.002693 | Mon2      | chr10 | + | 1.23E+08 | 1.23E+08 | 9300  | protein_co | MON2_ho        | 2000  | 2085  | 1174  | 1200  | 8.361231 | 9.286488 | 5.338917 | 6.142272 |
| ENSMUSGI | 476.5553 | 590.2143 | 359.4617 | 328.7685 | 0.52189 | 0.004633 | 0.037458 | Zcchc11   | chr4  | + | 1.08E+08 | 1.09E+08 | 6054  | protein_co | zinc_finger    | 527   | 610   | 353   | 297   | 3.384476 | 4.173648 | 2.466041 | 2.335311 |
| ENSMUSGI | 4731.19  | 4280.505 | 3242.284 | 3597.635 | 0.3691  | 0.003469 | 0.030927 | Zyg11b    | chr4  | - | 1.08E+08 | 1.08E+08 | 8691  | protein_co | zyg-ll_fami    | 5232  | 4424  | 3184  | 3250  | 23.40567 | 21.08501 | 15.49428 | 17.801   |
| ENSMUSGI | 1159.286 | 1264.607 | 637.4591 | 605.5096 | 0.85914 | 1.28E-08 | 3.30E-06 | Ankrd12   | chr17 | - | 65967501 | 66077089 | 8991  | protein_co | ankyrin_re     | 1282  | 1307  | 626   | 547   | 5.543744 | 6.021379 | 2.944655 | 2.896077 |
| ENSMUSGI | 3485.998 | 2921.077 | 2197.503 | 2202.859 | 0.49716 | 0.000214 | 0.004501 | Cacna1a   | chr8  | + | 84388440 | 84640246 | 7926  | protein_co | microtubu      | 3855  | 3019  | 2158  | 1990  | 18.91009 | 15.77747 | 11.51504 | 11.9517  |
| ENSMUSGI | 1091.465 | 1062.386 | 744.3811 | 718.42   | 0.4999  | 0.000778 | 0.010963 | Cnot6l    | chr5  | - | 96070333 | 96164171 | 8564  | protein_co | CCR4-NOT       | 1207  | 1098  | 731   | 649   | 5.479662 | 5.310728 | 3.610013 | 3.607437 |
| ENSMUSGI | 324.6363 | 350.2583 | 208.7526 | 142.7984 | 0.70019 | 0.000945 | 0.012507 | Dgkh      | chr14 | - | 78569609 | 78725089 | 3967  | protein_co | diacylglyce    | 359   | 362   | 205   | 129   | 3.518483 | 3.779852 | 2.185545 | 1.547955 |
| ENSMUSGI | 1080.614 | 899.8348 | 768.8204 | 522.4873 | 0.51269 | 0.00486  | 0.003871 | Mast4     | chr13 | - | 1.03E+08 | 1.03E+08 | 10636 | protein_co | microtubu      | 1195  | 930   | 755   | 472   | 4.368303 | 3.621871 | 3.002179 | 2.112489 |
| ENSMUSGI | 6131.919 | 5969.872 | 4099.697 | 4093.555 | 0.52906 | 4.58E-06 | 0.000283 | Unc13a    | chr8  | - | 71624417 | 71671757 | 10255 | protein_co | unc-13_ho      | 6781  | 6170  | 4026  | 3698  | 25.70877 | 24.92171 | 16.60375 | 17.16572 |
| ENSMUSGI | 3391.048 | 3854.776 | 2719.893 | 2872.573 | 0.34569 | 0.006944 | 0.049344 | Celf5     | chr10 | - | 81459227 | 81482709 | 4391  | protein_co | CUGBP_El       | 3750  | 3984  | 2671  | 2595  | 33.20405 | 37.58238 | 25.72637 | 28.13226 |
| ENSMUSGI | 882.5788 | 1033.359 | 573.3058 | 603.2957 | 0.6163  | 0.00012  | 0.002985 | Tet3      | chr6  | - | 83362373 | 83459084 | 10904 | protein_co | tet_methy      | 976   | 1068  | 563   | 545   | 3.480063 | 4.057082 | 2.183688 | 2.379257 |
| ENSMUSGI | 1426.049 | 1493.919 | 992.8476 | 1151.243 | 0.40178 | 0.005685 | 0.043062 | Sidt2     | chr9  | - | 45937857 | 45955247 | 4237  | protein_co | SID1_trans     | 1577  | 1544  | 975   | 1040  | 14.47093 | 15.09445 | 9.732271 | 11.68438 |
| ENSMUSGI | 787.6275 | 882.4187 | 510.1709 | 566.7658 | 0.55147 | 0.000721 | 0.010399 | Dhx8      | chr11 | + | 1.02E+08 | 1.02E+08 | 4325  | protein_co | DEAH_(As)      | 871   | 912   | 501   | 512   | 7.829882 | 8.734481 | 4.899138 | 5.635268 |
| ENSMUSGI | 1884.815 | 1359.437 | 1278.544 | 1081.889 | 0.43256 | 0.001403 | 0.016517 | Syngg     | chr11 | + | 83964428 | 84044578 | 7115  | protein_co | synerg_in_g    | 1964  | 1948  | 1335  | 1155  | 10.73222 | 11.34077 | 7.935502 | 7.727478 |
| ENSMUSGI | 3975.213 | 3063.309 | 2294.242 | 2423.145 | 0.52131 | 0.000301 | 0.005698 | Tbr1      | chr2  | + | 61802930 | 61814114 | 3977  | protein_co | T-box_brai     | 4396  | 3166  | 2253  | 2189  | 42.97593 | 32.97492 | 23.95927 | 26.20118 |
| ENSMUSGI | 474.7467 | 498.2956 | 266.796  | 350.9078 | 0.53303 | 0.005052 | 0.039973 | Zc3h12b   | chrX  | + | 95711678 | 95932637 | 6914  | protein_co | zinc_finger    | 525   | 515   | 262   | 317   | 2.95225  | 3.085363 | 1.602655 | 2.182532 |
| ENSMUSGI | 595.0105 | 577.6359 | 352.3336 | 364.1913 | 0.65053 | 0.000477 | 0.007822 | Dcbl2d    | chr16 | + | 58408443 | 58469727 | 6561  | protein_co | retinoidin_(   | 658   | 597   | 346   | 329   | 3.899232 | 3.769057 | 2.230355 | 2.870203 |
| ENSMUSGI | 7317.43  | 8647.123 | 5572.166 | 6234.424 | 0.40216 | 0.001838 | 0.019559 | Ap2b1     | chr11 | + | 83299024 | 83405035 | 5625  | protein_co | adaptor-re     | 8092  | 8937  | 5472  | 5632  | 55.93151 | 65.81087 | 41.14259 | 47.66184 |
| ENSMUSGI | 2123.248 | 2144.123 | 1039.69  | 1280.758 | 0.79287 | 4.48E-08 | 7.97E-06 | Hectd1    | chr12 | - | 51743722 | 51829536 | 9012  | protein_co | HECT_dor       | 2348  | 2216  | 1021  | 1157  | 10.12978 | 10.18537 | 4.791512 | 6.114131 |
| ENSMUSGI | 882.5788 | 1033.359 | 573.3058 | 603.2957 | 0.94241 | 4.77E-08 | 8.21E-06 | Vps13c    | chr9  | + | 67840396 | 67995634 | 11523 | protein_co | vacuolar_f     | 883   | 838   | 327   | 375   | 2.979328 | 3.102346 | 1.200191 | 1.549161 |
| ENSMUSGI | 916.0351 | 811.7865 | 577.3791 | 645.3603 | 0.4367  | 0.006764 | 0.048665 | Pdzr3     | chr6  | - | 1.01E+08 | 1.01E+08 | 4104  | protein_co | PDZ_doma       | 1013  | 839   | 567   | 583   | 9.596774 | 8.468042 | 5.843106 | 6.762261 |
| ENSMUSGI | 831.9173 | 945.3104 | 565.1594 | 643.1464 | 0.48604 | 0.002719 | 0.025869 | 221008M   | chr5  | + | 98590615 | 98656569 | 4005  | protein_co | RIKEN_cDF      | 920   | 977   | 555   | 581   | 8.931173 | 10.04663 | 5.860821 | 6.905646 |
| ENSMUSGI | 594.1116 | 685.0356 | 380.8462 | 442.7858 | 0.53731 | 0.00224  | 0.022656 | Pdm8      | chr5  | + | 98180866 | 98187448 | 3119  | protein_co | PR_domai       | 657   | 708   | 374   | 400   | 8.189798 | 9.402563 | 5.071358 | 6.104855 |
| ENSMUSGI | 474.7467 | 499.2632 | 233.1919 | 290.0247 | 0.72986 | 0.000117 | 0.002942 | Tab3      | chrX  | + | 85574022 | 85634469 | 6364  | protein_co | TGF-beta_      | 525   | 516   | 229   | 262   | 3.207394 | 3.35852  | 1.521855 | 1.959755 |
| ENSMUSGI | 1508.338 | 1584.87  | 1082.458 | 1160.099 | 0.42233 | 0.002421 | 0.023833 | Fam179b   | chr12 | + | 64965742 | 65022573 | 6434  | protein_co | family_wit     | 1668  | 1638  | 1063  | 1048  | 10.07948 | 10.74536 | 6.987475 | 7.753735 |
| ENSMUSGI | 1814.889 | 1747.421 | 1166.978 | 1451.231 | 0.39922 | 0.006778 | 0.048734 | Knc2      | chr10 | + | 1.12E+08 | 1.12E+08 | 6196  | protein_co | potassium_     | 2007  | 1806  | 1146  | 1311  | 12.59387 | 12.05354 | 7.822422 | 10.07215 |
| ENSMUSGI | 724.3279 | 770.1812 | 479.6218 | 537.9848 | 0.48167 | 0.003432 | 0.030683 | Ppp1r26   | chr2  | + | 28446800 | 28455508 | 5466  | protein_co | protein_ph     | 801   | 796   | 471   | 486   | 5.697523 | 6.032146 | 3.644344 | 4.232504 |
| ENSMUSGI | 32311.72 | 29293.98 | 19512.76 | 23082.42 | 0.49516 | 6.68E-05 | 0.001199 | Syt1      | chr10 | - | 1.08E+08 | 1.09E+08 | 4820  | protein_co | synaptotag     | 35732 | 30276 | 19162 | 20852 | 288.2262 | 260.1835 | 168.1364 | 205.9356 |
| ENSMUSGI | 2197.399 | 2299.9   | 1439.884 | 1505.472 | 0.56275 | 1.71E-05 | 0.000764 | Dock4     | chr12 | + | 40446053 | 40846486 | 8063  | protein_co | dedicator_     | 2430  | 2377  | 1414  | 1360  | 11.71744 | 12.21127 | 7.416872 | 8.029213 |
| ENSMUSGI | 1014.602 | 995.6237 | 665.9716 | 733.9175 | 0.46467 | 0.00232  | 0.023175 | Ptpn23    | chr9  | - | 1.1E+08  | 1.1E+08  | 5336  | protein_co | protein_ty     | 1122  | 1029  | 654   | 663   | 8.175234 | 7.987814 | 5.183582 | 5.914641 |
| ENSMUSGI | 8698.265 | 8670.344 | 6729.979 | 6992.695 | 0.32067 | 0.004392 | 0.036173 | N28178    | chr4  | + | 42916660 | 42944752 | 6538  | protein_co | expressed_     | 9619  | 8961  | 6609  | 6317  | 57.2016  | 56.77275 | 42.75224 | 45.99352 |
| ENSMUSGI | 2147.664 | 1957.383 | 1310.559 | 1446.803 | 0.52433 | 0.000134 | 0.003179 | Mgat5     | chr1  | + | 1.27E+08 | 1.27E+08 | 8436  | protein_co | mannoside      | 2375  | 2023  | 1287  | 1307  | 10.94587 | 9.933166 | 6.452232 | 7.375131 |
| ENSMUSGI | 415.0643 | 317.3611 | 225.0455 | 205.8954 | 0.59326 | 0.003484 | 0.030936 | Fst14     | chr11 | + | 52764634 | 53188538 | 4380  | protein_co | folliculin-l   | 459   | 328   | 221   | 186   | 4.074382 | 3.101902 | 2.13396  | 2.02148  |
| ENSMUSGI | 2819.544 | 2746.915 | 1969.402 | 2135.335 | 0.40718 | 0.001378 | 0.016346 | Slc2a13   | chr15 | - | 91267696 | 91573261 | 6536  | protein_co | solute_car     | 3118  | 2839  | 1934  | 1929  | 18.54758 | 17.99209 | 12.51447 | 14.04918 |
| ENSMUSGI | 5804.57  | 6346.255 | 4181.161 | 4598.331 | 0.43709 | 0.000355 | 0.006353 | Kidins220 | chr12 | + | 24974932 | 25059697 | 7402  | protein_co | kinase_D-i     | 6419  | 6559  | 4106  | 4154  | 33.71642 | 36.7043  | 23.46053 | 26.71457 |
| ENSMUSGI | 1291.311 | 1501.66  | 703.6489 | 1006.231 | 0.60516 | 0.000425 | 0.0072   | C530008M  | chr5  | + | 76656512 | 76873554 | 6921  | protein_co | RIKEN_cDF      | 1428  | 1552  | 691   | 909   | 8.021998 | 9.288621 | 4.222574 | 6.252098 |
| ENSMUSGI | 2296.87  | 2560.175 | 1604.849 | 1520.969 | 0.58363 | 1.22E-05 | 0.000606 | Arhgap26  | chr18 | + | 38601534 | 39376284 | 7898  | protein_co | Rho_GTPa       | 2540  | 2646  | 1576  | 1374  | 12.50374 | 13.87718 | 8.439313 | 8.281334 |
| ENSMUSGI | 1947.818 | 2005.761 | 1173.088 | 1443.482 | 0.53713 | 0.000213 | 0.004501 | Tbc1d24   | chr17 | - | 24175431 | 24205562 | 7946  | protein_co | TBC1_dom       | 2154  | 2073  | 1152  | 1304  | 10.53951 | 10.80635 | 6.131574 | 7.811935 |
| ENSMUSGI | 1144.818 | 1118.504 | 739.2896 | 845.7209 | 0.54882 | 0.002386 | 0.023657 | Ect1      | chr10 | + | 95940663 | 96045518 | 7836  | protein_co | folliculin_end | 1266  | 1156  | 726   | 764   | 6.281487 | 6.110711 | 3.918413 | 4.641193 |
| ENSMUSGI | 2009.309 | 1996.085 | 1456.176 | 1359.352 | 0.4672  | 0.000435 | 0.007327 | Cnot1     | chr8  | - | 95719451 | 95807462 | 8390  | protein_co | CCR4-NOT       | 2222  | 2063  | 1430  | 1228  | 10.29687 | 10.18511 | 7.208454 | 6.967342 |
| ENSMUSGI | 889.811  | 837.9107 | 513.2258 | 518.0594 | 0.65444 | 3.73E-05 | 0.001342 | Gltscr1l  | chr17 | - | 46798116 | 46831413 | 6579  | protein_co | GLTSCR1-li     | 984   | 866   | 504   | 468   | 5.815116 | 5.452383 | 3.239953 | 3.386232 |
| ENSMUSGI | 3220.139 | 3543.221 | 2319.699 | 2666.678 | 0.40461 | 0.002202 | 0.022438 | Arhgap21  | chr2  | + | 20847919 | 20968881 | 7351  | protein_co | Rho_GTPa       | 3561  | 3662  | 2278  | 2409  | 18.83427 | 20.6348  | 13.10616 | 15.59987 |
| ENSMUSGI | 2855.715 | 2518.57  | 1807.492 | 1795.497 | 0.53098 | 5.64E-05 | 0.001758 | Etl4      | chr2  | + | 19909780 | 20810713 | 7413  | protein_co | enhancer_      | 3158  | 2603  | 1775  | 1622  | 16.56309 | 14.54483 | 10.1268  | 10.41568 |
| ENSMUSGI | 4868.641 | 5403.847 | 3703.576 | 3711.652 | 0.43885 | 0.0003   | 0.005676 | Fam115a   | chr6  | - | 42668002 | 42710072 | 5256  | protein_co | family_wit     | 5384  | 5585  | 3637  | 3353  | 39.82657 | 44.01454 | 29.2655  | 30.36749 |
| ENSMUSGI | 1770.579 | 2310.544 | 1100.788 | 1421.342 | 0.604   | 0.000227 | 0.004656 | Agot2     | chr15 | - | 73095844 | 73184840 | 13705 | protein_co | argonatase     | 1958  | 2388  | 1081  | 1284  | 5.554652 | 7.217448 | 3.335913 | 4.459813 |
| ENSMUSGI | 1011.889 | 1046.905 | 656.8069 | 666.3927 | 0.56906 | 0.000162 | 0.003608 | Mbd5      | chr2  | + | 48949510 | 49322284 | 5922  | protein_co | methyl_Cp      | 1119  | 1082  | 645   | 602   | 7.346574 | 7.568106 | 4.606376 | 4.839035 |
| ENSMUSGI | 283.9438 | 324.1341 | 143.581  | 172.6    |         |          |          |           |       |   |          |          |       |            |                |       |       |       |       |          |          |          |          |

|          |          |          |          |          |         |          |           |          |       |   |          |          |       |            |              |       |       |       |       |          |          |          |          |
|----------|----------|----------|----------|----------|---------|----------|-----------|----------|-------|---|----------|----------|-------|------------|--------------|-------|-------|-------|-------|----------|----------|----------|----------|
| ENSMUSGI | 1497.487 | 1545.2   | 1107.916 | 1181.131 | 0.37419 | 0.006914 | 0.049313  | Cpeb2    | chr5  | + | 43233463 | 43289724 | 6823  | protein_co | cytoplasmic  | 1656  | 1597  | 1088  | 1067  | 9.436439 | 9.695226 | 6.744062 | 7.44423  |
| ENSMUSGI | 428.6285 | 625.0466 | 312.6197 | 344.266  | 0.54151 | 0.005863 | 0.043927  | 2410089E | chr15 | + | 8169106  | 8271158  | 10469 | protein_co | RIKEN_cDN    | 474   | 646   | 307   | 311   | 1.760339 | 2.55597  | 1.240227 | 1.414119 |
| ENSMUSGI | 7883.509 | 7784.055 | 4499.891 | 5449.586 | 0.6061  | 2.26E-06 | 0.0001366 | Gabb2r   | chr4  | - | 46662318 | 46991873 | 5737  | protein_co | gammia-an    | 8718  | 8045  | 4419  | 4923  | 5.9828   | 58.08575 | 32.57671 | 40.84846 |
| ENSMUSGI | 1082.423 | 1087.542 | 538.6835 | 656.43   | 0.7556  | 2.18E-06 | 0.000162  | Epg5     | chr18 | + | 77938467 | 78035027 | 9672  | protein_co | ectopic_P-   | 1197  | 1124  | 529   | 593   | 4.811728 | 4.813693 | 2.313169 | 2.918563 |
| ENSMUSGI | 2433.416 | 2489.543 | 1482.652 | 1723.544 | 0.56643 | 2.95E-05 | 0.00112   | Rere     | chr4  | + | 1.5E+08  | 1.51E+08 | 7728  | protein_co | arginine_g   | 2691  | 2573  | 1456  | 1557  | 13.53848 | 13.79117 | 7.968238 | 9.590742 |
| ENSMUSGI | 728.8493 | 723.7381 | 436.8529 | 428.3953 | 0.64888 | 8.05E-05 | 0.002367  | Zfp292   | chr4  | - | 34803113 | 34882960 | 9986  | protein_co | zinc_finger  | 806   | 748   | 429   | 387   | 3.138099 | 3.10269  | 1.816911 | 1.844804 |
| ENSMUSGI | 2772.521 | 2602.748 | 2026.427 | 2012.462 | 0.38237 | 0.00251  | 0.024469  | Magi2    | chr5  | + | 19227046 | 20704798 | 6536  | protein_co | membrane     | 3066  | 2690  | 1990  | 1818  | 18.23825 | 17.04781 | 12.87683 | 13.24075 |
| ENSMUSGI | 1468.55  | 1509.4   | 1148.648 | 1074.863 | 0.38343 | 0.005874 | 0.043979  | Slc7a5   | chr8  | - | 1.22E+08 | 1.22E+08 | 3517  | protein_co | solute_car   | 1624  | 1560  | 1128  | 971   | 17.95299 | 18.37302 | 13.56453 | 13.14249 |
| ENSMUSGI | 4795.394 | 5659.284 | 2179.173 | 2985.483 | 0.90425 | 3.51E-09 | 1.29E-06  | Disp2    | chr2  | + | 1.19E+08 | 1.19E+08 | 6626  | protein_co | dispatched   | 5303  | 5849  | 2140  | 2697  | 31.11669 | 36.56441 | 13.65936 | 19.37583 |
| ENSMUSGI | 1003.75  | 1176.558 | 621.1662 | 684.1041 | 0.65143 | 3.79E-05 | 0.001358  | Baz2a    | chr10 | + | 1.28E+08 | 1.28E+08 | 8372  | protein_co | bromodon     | 1110  | 1216  | 610   | 618   | 5.154861 | 6.016345 | 3.081546 | 3.513905 |
| ENSMUSGI | 3873.029 | 4128.597 | 2330.901 | 2775.16  | 0.59577 | 7.21E-06 | 0.0004    | Gramd1b  | chr9  | - | 40293233 | 40531383 | 7334  | protein_co | GRAM_doi     | 4283  | 4267  | 2289  | 2507  | 22.70546 | 24.09962 | 13.19997 | 16.27212 |
| ENSMUSGI | 4701.349 | 5344.825 | 3015.202 | 3810.172 | 0.50637 | 0.000323 | 0.005916  | Cacna2d1 | chr5  | + | 15934691 | 16374511 | 7472  | protein_co | calcium_cf   | 5199  | 5524  | 2961  | 3442  | 27.05242 | 30.62282 | 16.75983 | 21.92829 |
| ENSMUSGI | 3980.638 | 3722.22  | 2193.429 | 2343.444 | 0.7099  | 1.25E-08 | 3.30E-06  | Gpr26    | chr7  | + | 1.32E+08 | 1.32E+08 | 11571 | protein_co | G_protein-   | 4402  | 3847  | 2154  | 2117  | 14.79116 | 13.77145 | 7.873047 | 8.709248 |
| ENSMUSGI | 1752.494 | 2482.77  | 1014.232 | 1016.193 | 0.92398 | 1.41E-08 | 3.44E-06  | Prrc2c   | chr1  | - | 1.63E+08 | 1.63E+08 | 11502 | protein_co | proline-rici | 1938  | 2566  | 996   | 918   | 6.505939 | 9.240844 | 3.662301 | 3.799269 |
| ENSMUSGI | 6419.48  | 7798.569 | 4482.58  | 4610.507 | 0.59532 | 4.36E-06 | 0.002076  | Lrp1     | chr10 | - | 1.28E+08 | 1.28E+08 | 14888 | protein_co | low_densit   | 7099  | 8060  | 4402  | 4165  | 18.5389  | 22.42472 | 12.50494 | 13.31709 |
| ENSMUSGI | 2666.72  | 2703.375 | 1652.709 | 1508.793 | 0.70511 | 5.74E-08 | 9.56E-06  | Dnm3     | chr1  | - | 1.62E+08 | 1.62E+08 | 7523  | protein_co | dynamini_i   | 2949  | 2794  | 1623  | 1363  | 15.24077 | 15.3838  | 9.124215 | 8.624531 |
| ENSMUSGI | 966.6748 | 968.5319 | 565.1594 | 608.8305 | 0.63895 | 3.65E-05 | 0.001319  | Bcor     | chrX  | - | 12036740 | 12160355 | 6941  | protein_co | BCL6_inter   | 1069  | 1001  | 555   | 550   | 5.987959 | 5.973659 | 3.38173  | 3.771997 |
| ENSMUSGI | 807.5216 | 913.3807 | 514.2441 | 601.0818 | 0.54301 | 0.000999 | 0.012895  | Aqr      | chr2  | - | 1.14E+08 | 1.14E+08 | 4888  | protein_co | aquariums    | 893   | 944   | 505   | 543   | 7.103027 | 7.999617 | 4.369464 | 5.288096 |
| ENSMUSGI | 974.8133 | 1215.261 | 771.8754 | 523.5942 | 0.62807 | 0.000586 | 0.008953  | Akap9    | chr5  | + | 3928054  | 4080209  | 12022 | protein_co | A_kinase_i   | 1078  | 1256  | 758   | 473   | 3.486304 | 4.327542 | 2.666616 | 1.872902 |
| ENSMUSGI | 735.1792 | 830.1702 | 550.9031 | 520.2733 | 0.47615 | 0.003549 | 0.031318  | S330417C | chr3  | + | 1.08E+08 | 1.09E+08 | 5836  | protein_co | RIKEN_cDN    | 813   | 858   | 541   | 470   | 5.416247 | 6.089763 | 3.920577 | 3.833657 |
| ENSMUSGI | 6419.48  | 882.4187 | 457.219  | 438.358  | 0.75674 | 5.35E-06 | 0.000318  | Rc3h1    | chr1  | + | 1.61E+08 | 1.61E+08 | 11006 | protein_co | RING_CCC1    | 841   | 912   | 449   | 396   | 2.970911 | 3.632282 | 1.725983 | 1.71276  |
| ENSMUSGI | 624.8571 | 348.3232 | 266.796  | 193.7188 | 0.77097 | 0.000447 | 0.007443  | Cdh12    | chr15 | + | 21111452 | 21589533 | 5639  | protein_co | cadherin_j   | 691   | 360   | 262   | 175   | 4.7643   | 2.64441  | 1.965021 | 1.477293 |
| ENSMUSGI | 1856.486 | 2314.414 | 1158.831 | 1256.405 | 0.70628 | 1.97E-06 | 0.000151  | Bptf     | chr11 | - | 1.07E+08 | 1.07E+08 | 12036 | protein_co | bromodon     | 2053  | 2392  | 1138  | 1135  | 6.631777 | 8.232038 | 3.998786 | 4.488946 |
| ENSMUSGI | 1649.454 | 1364.266 | 876.7608 | 1008.445 | 0.52834 | 0.000337 | 0.006088  | Ltbp4    | chr7  | - | 27305136 | 27337692 | 5386  | protein_co | clatent_trar | 1625  | 1410  | 861   | 911   | 11.73033 | 12.84379 | 6.760905 | 8.05161  |
| ENSMUSGI | 1069.763 | 1233.645 | 775.9486 | 815.8329 | 0.47459 | 0.001806 | 0.019401  | Zfp609   | chr9  | - | 65692391 | 65827564 | 7777  | protein_co | zinc_finger  | 1183  | 1275  | 762   | 737   | 5.914197 | 6.790886 | 4.143916 | 4.511138 |
| ENSMUSGI | 3332.27  | 3667.069 | 1965.329 | 2820.546 | 0.48343 | 0.002154 | 0.022061  | Necab1   | chr4  | - | 14952245 | 15149794 | 9422  | protein_co | N-terminal   | 3685  | 3790  | 1930  | 2548  | 29.10845 | 31.89525 | 16.58379 | 24.64271 |
| ENSMUSGI | 4371.287 | 4357.91  | 2952.605 | 3023.12  | 0.58884 | 4.35E-06 | 0.000276  | Adam22   | chr5  | - | 8072352  | 8368160  | 9245  | protein_co | WD_disintegi | 4834  | 4504  | 2546  | 2731  | 20.32932 | 20.17994 | 11.64715 | 14.06195 |
| ENSMUSGI | 4225.698 | 4508.85  | 2651.667 | 2920.172 | 0.60296 | 1.29E-06 | 0.000107  | Wdr7     | chr18 | + | 63708695 | 63989760 | 7109  | protein_co | WD_repea     | 4673  | 4660  | 2604  | 2638  | 25.55703 | 27.15225 | 15.49175 | 17.66432 |
| ENSMUSGI | 667.3583 | 733.4138 | 376.7729 | 441.6789 | 0.66145 | 0.000125 | 0.003043  | Btaf1    | chr19 | + | 36926079 | 37012752 | 7204  | protein_co | BTA1_RN      | 738   | 758   | 370   | 399   | 3.982959 | 4.358368 | 2.172181 | 2.663513 |
| ENSMUSGI | 3446.209 | 4170.202 | 2506.049 | 3108.356 | 0.39634 | 0.006499 | 0.047351  | Erc2     | chr14 | + | 27622442 | 28478537 | 6083  | protein_co | ELKS/RABE    | 3811  | 4310  | 2808  | 2808  | 24.35815 | 29.34863 | 17.11047 | 21.97404 |
| ENSMUSGI | 4726.669 | 4782.671 | 3599.709 | 3846.702 | 0.33038 | 0.005459 | 0.042031  | Madd     | chr2  | - | 91137360 | 91183837 | 5990  | protein_co | MAP-kinas    | 5227  | 4943  | 3535  | 3475  | 33.92772 | 34.18158 | 24.95927 | 27.61587 |
| ENSMUSGI | 1460.411 | 1336.206 | 921.5662 | 1037.226 | 0.46245 | 0.001579 | 0.017758  | Dnajc16  | chr4  | - | 1.42E+08 | 1.42E+08 | 5969  | protein_co | DnaJ_(Hsp    | 1615  | 1381  | 905   | 937   | 10.51948 | 9.583419 | 6.412318 | 7.472548 |
| ENSMUSGI | 946.7806 | 794.3703 | 538.6835 | 477.1017 | 0.67067 | 6.16E-05 | 0.001872  | Kcna2    | chr3  | + | 1.07E+08 | 1.07E+08 | 3456  | protein_co | potassium_i  | 1047  | 821   | 529   | 431   | 11.77867 | 9.840061 | 6.473661 | 5.936552 |
| ENSMUSGI | 1750.685 | 1935.129 | 1089.587 | 1193.308 | 0.62805 | 7.53E-06 | 0.004415  | Spen     | chr4  | - | 1.41E+08 | 1.42E+08 | 12299 | protein_co | SPEN_hom     | 1936  | 2000  | 1070  | 1078  | 6.120103 | 6.73579  | 3.679442 | 4.17234  |
| ENSMUSGI | 497.3537 | 519.5821 | 329.9309 | 311.057  | 0.55766 | 0.001869 | 0.019788  | Crocc    | chr4  | - | 1.41E+08 | 1.41E+08 | 6582  | protein_co | ciliary_roo  | 550   | 537   | 324   | 281   | 3.248837 | 3.37944  | 2.081877 | 2.032259 |
| ENSMUSGI | 526.2907 | 546.6739 | 309.5648 | 321.0197 | 0.64505 | 0.000287 | 0.005533  | Ino80d   | chr1  | - | 62958418 | 63114667 | 13675 | protein_co | INO80_cor    | 582   | 565   | 304   | 290   | 1.654698 | 1.711392 | 0.940187 | 1.009489 |
| ENSMUSGI | 39026.9  | 41891.67 | 26820.12 | 32027.81 | 0.42783 | 0.000522 | 0.008337  | Atp1a3   | chr7  | - | 24978167 | 25005957 | 3895  | protein_co | ATPase_Ne    | 43158 | 43296 | 26338 | 28933 | 430.8013 | 460.4354 | 285.9851 | 353.6036 |
| ENSMUSGI | 313.785  | 417.0202 | 196.5329 | 226.9277 | 0.60494 | 0.003195 | 0.029112  | Tet2     | chr3  | - | 1.33E+08 | 1.34E+08 | 9179  | protein_co | ctet_methy   | 347   | 431   | 193   | 205   | 1.469797 | 1.944958 | 0.889262 | 1.063137 |
| ENSMUSGI | 1049.869 | 1041.099 | 785.1133 | 736.1314 | 0.41051 | 0.005964 | 0.044366  | Nrg3     | chr14 | - | 38368952 | 39473088 | 4011  | protein_co | neuregulin   | 1161  | 1076  | 771   | 665   | 11.25389 | 11.11189 | 8.129611 | 7.892229 |
| ENSMUSGI | 3174.021 | 3147.487 | 2153.716 | 2446.392 | 0.42402 | 0.000997 | 0.01288   | Irgq     | chr7  | + | 24530648 | 24538599 | 6123  | protein_co | MAP-kinas    | 3510  | 3253  | 2115  | 2210  | 22.87747 | 22.00636 | 14.60879 | 17.8141  |
| ENSMUSGI | 1462.22  | 1616.8   | 1075.33  | 1022.835 | 0.5013  | 0.000407 | 0.006993  | Smc1a    | chrX  | + | 1.52E+08 | 1.52E+08 | 4691  | protein_co | structural_i | 1617  | 1671  | 1056  | 924   | 13.40194 | 14.75501 | 9.520648 | 9.376424 |
| ENSMUSGI | 3882.072 | 4232.126 | 2767.754 | 2619.078 | 0.54959 | 9.46E-06 | 0.000498  | Dmx12    | chr9  | - | 54365158 | 54501760 | 10614 | protein_co | Dmx-like_2   | 4293  | 4374  | 2718  | 2366  | 15.72552 | 17.06979 | 10.83025 | 10.61125 |
| ENSMUSGI | 1408.867 | 1558.746 | 980.6279 | 1059.365 | 0.48887 | 0.000666 | 0.009886  | Ckl13    | chr13 | - | 17715962 | 17805097 | 7081  | protein_co | cyclin-dept  | 1558  | 1611  | 963   | 957   | 8.554528 | 9.423871 | 5.751746 | 6.433511 |
| ENSMUSGI | 1137.584 | 1215.261 | 672.0815 | 744.9871 | 0.65276 | 1.54E-05 | 0.000696  | Atg2b    | chr12 | - | 1.06E+08 | 1.06E+08 | 10173 | protein_co | autophagy    | 1258  | 1256  | 660   | 673   | 4.807893 | 5.114097 | 2.743866 | 3.149175 |
| ENSMUSGI | 689.9653 | 858.2296 | 453.1458 | 459.3903 | 0.6511  | 0.00015  | 0.003436  | Dicer1   | chr12 | - | 1.05E+08 | 1.05E+08 | 9851  | protein_co | dicer_1_ril  | 763   | 887   | 445   | 415   | 3.011393 | 3.729861 | 1.910503 | 2.005388 |
| ENSMUSGI | 39026.9  | 41891.67 | 26820.12 | 32027.81 | 0.42783 | 0.000522 | 0.008337  | Atp1a3   | chr7  | - | 24978167 | 25005957 | 3895  | protein_co | ATPase_Ne    | 43158 | 43296 | 26338 | 28933 | 430.8013 | 460.4354 | 285.9851 | 353.6036 |
| ENSMUSGI | 7908.829 | 8425.55  | 4150.612 | 4845.184 | 0.79936 | 1.72E-10 | 1.27E-07  | Arhgap32 | chr9  | + | 32116136 | 32268446 | 13568 | protein_co | Rho_GTPa     | 8746  | 8708  | 4076  | 4377  | 25.06206 | 26.58465 | 12.70534 | 15.35647 |
| ENSMUSGI | 963.0577 | 919.1861 | 683.2828 | 656.43   | 0.43596 | 0.004375 | 0.036164  | Z        |       |   |          |          |       |            |              |       |       |       |       |          |          |          |          |

|          |          |          |          |          |         |          |          |          |       |   |          |          |       |                          |       |       |      |      |           |          |          |          |
|----------|----------|----------|----------|----------|---------|----------|----------|----------|-------|---|----------|----------|-------|--------------------------|-------|-------|------|------|-----------|----------|----------|----------|
| ENSMUSGI | 2050.906 | 2048.334 | 1601.794 | 1522.076 | 0.36121 | 0.005756 | 0.04341  | Atnx1    | chr13 | - | 45549758 | 45964991 | 10605 | protein_coataxin_1       | 2268  | 2117  | 1573 | 1375 | 8.314872  | 8.268725 | 6.273156 | 6.171955 |
| ENSMUSGI | 1907.125 | 1854.821 | 1287.138 | 1517.648 | 0.38485 | 0.006273 | 0.046166 | Spata2   | chr2  | - | 1.67E+08 | 1.67E+08 | 4912  | protein_co_spermatog     | 2109  | 1917  | 1264 | 1371 | 20.43802  | 19.79199 | 13.3246  | 16.26699 |
| ENSMUSGI | 877.1511 | 935.6347 | 625.2394 | 658.6439 | 0.44064 | 0.004498 | 0.036715 | Zfp445   | chr9  | - | 1.23E+08 | 1.23E+08 | 2961  | protein_co_ligand_finger | 970   | 967   | 614  | 595  | 12.73669  | 13.52747 | 8.769968 | 9.565535 |
| ENSMUSGI | 4420.118 | 5122.286 | 3559.995 | 3803.53  | 0.34617 | 0.006687 | 0.048384 | Lrrc4b   | chr7  | + | 44429018 | 44463351 | 2728  | protein_co_leucine_ric   | 4888  | 5294  | 3496 | 3436 | 69.66426  | 80.38369 | 54.19948 | 59.95695 |
| ENSMUSGI | 10713.9  | 11633.03 | 8246.236 | 7511.861 | 0.47222 | 6.44E-05 | 0.001943 | Cltc     | chr11 | - | 86694351 | 86757565 | 6519  | protein_co_clathrin_hr   | 11848 | 12023 | 8098 | 6786 | 70.66221  | 76.39417 | 52.53695 | 49.55227 |
| ENSMUSGI | 451.2355 | 611.5007 | 611.5007 | 271.2063 | 0.70074 | 0.000297 | 0.005667 | Dync2h1  | chr9  | - | 6928503  | 7184446  | 14264 | protein_co_dynenin_cyt   | 499   | 632   | 303  | 245  | 1.360136  | 1.835288 | 0.898399 | 0.817627 |
| ENSMUSGI | 588.686  | 593.1169 | 338.0773 | 348.6938 | 0.66591 | 0.000125 | 0.003043 | C2cd3    | chr7  | + | 1E+08    | 1E+08    | 7803  | protein_co_C2_calciu     | 651   | 613   | 332  | 315  | 3.243714  | 3.254073 | 1.79947  | 1.921674 |
| ENSMUSGI | 2258.89  | 2131.544 | 1537.641 | 1750.111 | 0.38213 | 0.004838 | 0.038695 | Atmin    | chr8  | + | 1.17E+08 | 1.17E+08 | 4877  | protein_co_ATM_inter     | 2498  | 2203  | 1510 | 1581 | 19.9142   | 18.7107  | 13.0946  | 15.43156 |
| ENSMUSGI | 1442.326 | 1397.163 | 1035.616 | 1021.728 | 0.42284 | 0.002447 | 0.023969 | Btl1b    | chr12 | + | 95692226 | 95785215 | 7099  | protein_co_fibronectir   | 1595  | 1444  | 1017 | 923  | 8.735478  | 8.425553 | 6.058872 | 6.148921 |
| ENSMUSGI | 1104.125 | 1157.207 | 774.9303 | 801.4423 | 0.46752 | 0.001499 | 0.017168 | Klh13    | chrX  | + | 1.58E+08 | 1.58E+08 | 1935  | protein_co_kelch-like_   | 1221  | 1196  | 761  | 724  | 24.53341  | 25.60228 | 16.63304 | 17.811   |
| ENSMUSGI | 386.1274 | 288.3342 | 195.5146 | 156.082  | 0.70002 | 0.000953 | 0.012546 | Rnf152   | chr1  | - | 1.05E+08 | 1.05E+08 | 8492  | protein_co_ring_finger   | 427   | 298   | 192  | 141  | 1.954974  | 1.453566 | 0.956223 | 0.790387 |
| ENSMUSGI | 1530.945 | 1807.41  | 953.1337 | 1132.425 | 0.60427 | 7.20E-05 | 0.002088 | Rnf150   | chr8  | + | 82863356 | 83091271 | 9685  | protein_co_ring_finger   | 1693  | 1868  | 936  | 1023 | 6.7960425 | 7.989243 | 4.087373 | 5.028183 |
| ENSMUSGI | 1199.075 | 1437.801 | 612.0014 | 586.6912 | 1.0043  | 1.27E-10 | 1.01E-07 | Tnrc6b   | chr15 | + | 80711319 | 80941086 | 17327 | protein_co_trinucleoti   | 1326  | 1486  | 601  | 530  | 2.975386  | 3.552416 | 1.466963 | 1.456073 |
| ENSMUSGI | 3769.941 | 2451.808 | 2316.644 | 1942.723 | 0.46872 | 0.005895 | 0.044072 | Kcna1    | chr6  | - | 1.27E+08 | 1.27E+08 | 8970  | protein_co_potassium     | 4169  | 2534  | 2275 | 1755 | 18.070169 | 11.70153 | 10.72647 | 9.313553 |
| ENSMUSGI | 1323.865 | 1912.875 | 601.8184 | 779.303  | 1.0309  | 8.16E-09 | 5.31E-06 | Tenn4    | chr7  | + | 96171244 | 96911093 | 13547 | protein_co_teneurin_t    | 1464  | 1977  | 5291 | 704  | 4.201662  | 6.044939 | 1.845068 | 2.473775 |
| ENSMUSGI | 782.2018 | 802.1108 | 582.4706 | 513.6316 | 0.4635  | 0.004248 | 0.035514 | Arid4a   | chr12 | + | 71015990 | 71098592 | 4998  | protein_co_AT_rich_in    | 865   | 829   | 572  | 464  | 6.728884  | 6.870473 | 4.84025  | 4.419289 |
| ENSMUSGI | 1013.697 | 1338.142 | 692.4476 | 615.4723 | 0.72907 | 1.40E-05 | 0.006668 | Kmt2d    | chr15 | - | 98831669 | 98871204 | 19823 | protein_co_lysinine_(K)  | 1121  | 1383  | 680  | 556  | 2.198667  | 2.889889 | 1.4508   | 1.335169 |
| ENSMUSGI | 1695.524 | 2075.426 | 1496.909 | 1228.731 | 0.41522 | 0.006937 | 0.049344 | Bcl11b   | chr12 | - | 1.08E+08 | 1.08E+08 | 8111  | protein_co_B_cell_leul   | 1875  | 2145  | 1470 | 1110 | 8.987731  | 10.95422 | 7.664979 | 6.514473 |
| ENSMUSGI | 1980.372 | 2061.88  | 1326.852 | 1494.402 | 0.47447 | 0.000502 | 0.008159 | Dip2c    | chr13 | + | 9276528  | 9668928  | 8023  | protein_co_DIP2_discc    | 2190  | 2131  | 1303 | 1350 | 10.61281  | 11.00209 | 6.868717 | 8.009911 |
| ENSMUSGI | 1427.857 | 1356.525 | 707.7221 | 720.6339 | 0.86847 | 2.02E-09 | 8.35E-07 | Sacs     | chr14 | + | 61138457 | 61240695 | 14991 | protein_co_sacsin        | 1579  | 1402  | 695  | 651  | 4.095196  | 3.873877 | 1.96075  | 2.067193 |
| ENSMUSGI | 1228.012 | 1389.422 | 765.7655 | 876.7159 | 0.59858 | 8.40E-05 | 0.001243 | Ccdc6    | chr10 | + | 70097121 | 70193200 | 5511  | protein_co_coiled-coil   | 1358  | 1436  | 752  | 792  | 9.580596  | 10.79325 | 5.771058 | 6.841093 |
| ENSMUSGI | 578.7389 | 577.6359 | 335.0224 | 360.8704 | 0.62164 | 0.000371 | 0.006558 | Klh11    | chr11 | - | 1E+08    | 1E+08    | 2393  | protein_co_kelch-like_   | 640   | 597   | 329  | 326  | 10.39825  | 10.3338  | 5.814619 | 6.484935 |
| ENSMUSGI | 2912.684 | 2526.311 | 1909.322 | 1867.449 | 0.48344 | 0.00028  | 0.005453 | Affa     | chr10 | - | 42181841 | 42276755 | 6848  | protein_co_forkhead_l    | 3221  | 2611  | 1875 | 1687 | 18.28732  | 15.79325 | 11.57992 | 11.72687 |
| ENSMUSGI | 1323.535 | 4175.04  | 2127.24  | 2522.772 | 0.61177 | 3.37E-05 | 0.001231 | Lonrf2   | chr1  | - | 38793669 | 38836090 | 6287  | protein_co_LONH_pepti    | 3630  | 4315  | 2089 | 2279 | 22.44845  | 28.42927 | 14.0528  | 17.25566 |
| ENSMUSGI | 1811.272 | 2036.723 | 1453.122 | 1390.347 | 0.39839 | 0.003639 | 0.031837 | Phf3     | chr1  | - | 30802339 | 30873921 | 7567  | protein_co_PHD_finge     | 2003  | 2105  | 1427 | 1256 | 10.29154  | 11.52277 | 7.97569  | 7.901265 |
| ENSMUSGI | 915.1309 | 879.516  | 626.2577 | 653.1091 | 0.43297 | 0.005062 | 0.039991 | Rnf2     | chr2  | - | 1.31E+08 | 1.31E+08 | 5978  | protein_co_ring_finger   | 1012  | 909   | 615  | 590  | 6.581847  | 6.298489 | 4.350981 | 4.698149 |
| ENSMUSGI | 4973.537 | 4568.839 | 2956.14  | 2936.777 | 0.64917 | 8.65E-08 | 1.28E-05 | Sorf14   | chr9  | - | 41964720 | 42124297 | 10715 | protein_co_sorfilin-rel  | 5500  | 4722  | 2903 | 2653 | 19.95693  | 18.25417 | 11.45837 | 11.78625 |
| ENSMUSGI | 1158.382 | 1014.007 | 769.8388 | 781.517  | 0.43266 | 0.004457 | 0.035256 | Smcr8    | chr11 | + | 60777524 | 60788287 | 7391  | protein_co_Smith-Mag     | 1281  | 1048  | 756  | 706  | 6.738591  | 6.733358 | 4.326001 | 4.547076 |
| ENSMUSGI | 1205.405 | 1606.157 | 570.2509 | 646.4673 | 1.0428  | 4.52E-10 | 2.60E-07 | Tenn2    | chr11 | - | 36006656 | 37235964 | 9908  | protein_co_teneurin_t    | 1333  | 1660  | 560  | 584  | 5.230791  | 6.939856 | 2.390397 | 2.805806 |
| ENSMUSGI | 3935.424 | 4810.73  | 2512.159 | 3340.819 | 0.51538 | 0.000743 | 0.010602 | Dcaf7    | chr11 | + | 1.06E+08 | 1.06E+08 | 5750  | protein_co_DDB1_and      | 4352  | 4972  | 2467 | 3018 | 29.42688  | 35.8172  | 18.14552 | 24.98516 |
| ENSMUSGI | 4349.584 | 4927.805 | 2895.042 | 3380.67  | 0.51834 | 9.50E-05 | 0.002555 | Affa     | chr11 | + | 53350833 | 53421830 | 10099 | protein_co_AF4/FMR2      | 4810  | 5093  | 2843 | 3054 | 18.51782  | 20.88929 | 11.96062 | 14.39532 |
| ENSMUSGI | 531.7164 | 632.7871 | 354.3702 | 418.4326 | 0.49365 | 0.006382 | 0.046731 | Spty2d1  | chr7  | - | 46990396 | 47008411 | 5223  | protein_co_SPT2_Supr     | 588   | 654   | 348  | 378  | 4.37704   | 5.18664  | 2.817911 | 3.445105 |
| ENSMUSGI | 2565.441 | 2968.487 | 1691.405 | 2032.387 | 0.51728 | 0.000293 | 0.005619 | Clip1    | chr5  | - | 1.24E+08 | 1.24E+08 | 6133  | protein_co_CAP-GLY_c     | 2837  | 3068  | 1661 | 1836 | 17.98496  | 20.721   | 11.4542  | 14.25051 |
| ENSMUSGI | 11964.52 | 10632.56 | 7553.788 | 9564.174 | 0.36652 | 0.00705  | 0.049856 | Lingo1   | chr9  | - | 56618475 | 56685253 | 3295  | protein_co_leucine_ric   | 13231 | 10989 | 7418 | 8640 | 156.1207  | 138.1437 | 95.2137  | 124.8214 |
| ENSMUSGI | 3931.807 | 4776.865 | 2858.383 | 3312.038 | 0.4526  | 0.001129 | 0.014127 | Grm5     | chr7  | + | 87602544 | 88134907 | 6896  | protein_co_glutamate     | 4348  | 4937  | 2807 | 2992 | 24.51407  | 29.65475 | 17.21524 | 20.65357 |
| ENSMUSGI | 646.5598 | 770.1812 | 449.0726 | 494.8132 | 0.50088 | 0.003475 | 0.030935 | Bdp1     | chr13 | - | 1E+08    | 1E+08    | 9921  | protein_co_B_double_     | 715   | 796   | 441  | 447  | 2.802036  | 3.323426 | 1.879971 | 2.14478  |
| ENSMUSGI | 484.6938 | 578.6035 | 239.3017 | 355.3356 | 0.65965 | 0.000947 | 0.012507 | Zfp646   | chr7  | + | 1.28E+08 | 1.28E+08 | 6310  | protein_co_zinc_finger   | 536   | 598   | 235  | 321  | 3.20262   | 3.925547 | 1.575094 | 2.421622 |
| ENSMUSGI | 848.2142 | 1133.985 | 475.5485 | 707.3503 | 0.60689 | 0.001338 | 0.016104 | Armcx4   | chrX  | + | 1.35E+08 | 1.35E+08 | 7996  | protein_co_armadillo     | 938   | 1172  | 467  | 639  | 4.560928  | 6.071321 | 2.470086 | 3.80416  |
| ENSMUSGI | 4874.067 | 5357.404 | 3487.695 | 3779.177 | 0.45964 | 0.000192 | 0.004127 | Ubp1n2   | chrX  | + | 1.53E+08 | 1.54E+08 | 3344  | protein_co_ubiquitin_l   | 5390  | 5537  | 3425 | 3414 | 62.66798  | 68.58618 | 43.3174  | 48.59907 |
| ENSMUSGI | 1105.031 | 1100.121 | 545.8116 | 763.8055 | 0.64382 | 0.000168 | 0.003704 | D8Ert82e | chr8  | + | 36094828 | 36147787 | 4780  | protein_co_DNA_segr      | 1222  | 1137  | 536  | 690  | 9.939545  | 9.852829 | 4.742474 | 6.871506 |
| ENSMUSGI | 1333.812 | 1172.688 | 712.8137 | 870.0741 | 0.58419 | 0.000219 | 0.004559 | Oscam    | chr16 | - | 96592079 | 97170752 | 7498  | protein_co_Down_syn      | 1475  | 1212  | 700  | 786  | 7.648385  | 6.695539 | 3.948395 | 4.990084 |
| ENSMUSGI | 836.4585 | 957.8887 | 509.1526 | 552.3753 | 0.66088 | 4.63E-05 | 0.001551 | Rictor   | chr15 | + | 6708381  | 6800398  | 9311  | protein_co_RPTOR_inc     | 925   | 990   | 500  | 499  | 3.862501  | 4.404202 | 2.271128 | 2.551144 |
| ENSMUSGI | 1937.871 | 1654.535 | 1129.3   | 1141.28  | 0.59908 | 2.73E-05 | 0.010663 | Kcnb1    | chr2  | - | 1.67E+08 | 1.67E+08 | 3725  | protein_co_potassium     | 2143  | 1710  | 1109 | 1031 | 22.36758  | 19.01508 | 12.59138 | 13.71538 |
| ENSMUSGI | 637.5171 | 889.1916 | 401.2123 | 490.3853 | 0.63726 | 0.000631 | 0.009487 | Zfp831   | chr2  | + | 1.75E+08 | 1.75E+08 | 9807  | protein_co_zinc_finger   | 705   | 919   | 394  | 443  | 2.794963  | 3.881573 | 1.699136 | 2.150296 |
| ENSMUSGI | 3182.16  | 2728.531 | 1925.615 | 1959.327 | 0.55611 | 3.02E-05 | 0.001132 | Prkca    | chr11 | - | 1.08E+08 | 1.08E+08 | 8409  | protein_co_protein_kii   | 3519  | 2820  | 1891 | 1770 | 16.27039  | 13.80999 | 9.51076  | 10.01981 |
| ENSMUSGI | 3545.68  | 3429.048 | 2209.722 | 2656.715 | 0.47659 | 0.000377 | 0.006663 | Creg2    | chr1  | - | 39618406 | 39651182 | 5799  | protein_co_cellular_re   | 3921  | 3544  | 2170 | 2400 | 26.28857  | 25.31448 | 15.82613 | 19.70103 |
| ENSMUSGI | 5451.901 | 4924.903 | 3791.15  | 3221.267 | 0.52088 | 6.95E-05 | 0.002034 | Pcb1     | chr2  | + | 1.35E+08 | 1.35E+08 | 7003  | protein_co_phospholip    | 6029  | 5090  | 3723 | 2910 | 33.47221  | 30.10662 | 22.48417 | 19.78061 |
| ENSMUSGI | 1147.531 | 1564.552 | 607.9282 | 739.4523 | 0.86089 | 5.86E-07 | 6.05E-05 | Caena1c  | chr6  | - | 1.19E+08 | 1.19E+08 | 13162 | protein_co_calcium_cf    | 1269  | 1617  | 597  | 668  | 3.748547  | 5.088813 | 1.918317 | 2.415935 |
| ENSMUSGI | 856.3527 | 927.8942 | 583.4889 | 593.333  | 0.52975 | 0.000726 | 0.010441 | Plekhh3  | chr1  | - | 64785983 | 649568   |       |                          |       |       |      |      |           |          |          |          |

|          |           |          |          |          |          |          |          |           |       |   |          |          |       |            |              |       |       |       |       |          |          |          |          |
|----------|-----------|----------|----------|----------|----------|----------|----------|-----------|-------|---|----------|----------|-------|------------|--------------|-------|-------|-------|-------|----------|----------|----------|----------|
| ENSMUSGI | 351.7647  | 478.9444 | 282.0705 | 188.184  | 0.61082  | 0.003929 | 0.033583 | Mdn1      | chr4  | + | 32657119 | 32775217 | 17970 | protein_co | midasin_hu   | 389   | 495   | 277   | 170   | 0.841637 | 1.141    | 0.651928 | 0.450331 |
| ENSMUSGI | 421.3943  | 321.2314 | 221.9905 | 229.1417 | 0.56121  | 0.005374 | 0.041655 | Chsy3     | chr18 | + | 59175401 | 59410446 | 2931  | protein_co | chondroitin  | 466   | 332   | 218   | 207   | 6.181491 | 4.69192  | 3.145638 | 3.361903 |
| ENSMUSGI | 3731.057  | 4492.401 | 2333.956 | 2774.053 | 0.62333  | 1.01E-05 | 0.000521 | Sez6l     | chr5  | - | 1.12E+08 | 1.13E+08 | 6080  | protein_co | seizure_rel  | 4126  | 4643  | 2292  | 2506  | 26.3845  | 31.63177 | 15.94333 | 19.62042 |
| ENSMUSGI | 2777.042  | 2121.869 | 1619.105 | 1463.407 | 0.59562  | 8.53E-05 | 0.002368 | Kcnh1     | chr1  | + | 1.92E+08 | 1.93E+08 | 7232  | protein_co | potassium    | 3071  | 2193  | 1590  | 1322  | 16.50991 | 12.56055 | 9.298368 | 8.701693 |
| ENSMUSGI | 17968.94  | 20284.02 | 12626.98 | 15236.26 | 0.42248  | 0.001057 | 0.01341  | Spock2    | chr10 | + | 60106219 | 60135198 | 5238  | protein_co | sparc/oste   | 19871 | 20964 | 12400 | 13764 | 147.495  | 165.7819 | 100.1208 | 125.0863 |
| ENSMUSGI | 641.1342  | 857.262  | 281.0522 | 346.4799 | 1.0267   | 4.56E-08 | 7.99E-06 | Rnf169    | chr7  | - | 99920257 | 99980458 | 7154  | protein_co | ring_finger  | 709   | 886   | 276   | 313   | 3.85319  | 5.12995  | 1.631654 | 2.082697 |
| ENSMUSGI | 368.0418  | 307.6855 | 145.6176 | 146.1193 | 0.9232   | 8.18E-06 | 0.000447 | Grin2a    | chr16 | - | 9577710  | 9994921  | 4820  | protein_co | glutamate    | 407   | 318   | 143   | 132   | 3.282997 | 2.732804 | 1.254749 | 1.30364  |
| ENSMUSGI | 2104.258  | 2072.523 | 1543.751 | 1629.452 | 0.36558  | 0.00514  | 0.040514 | Usp47     | chr7  | + | 1.12E+08 | 1.12E+08 | 5540  | protein_co | cubiquitin_s | 2327  | 2142  | 1516  | 1472  | 16.33089 | 16.01541 | 11.57331 | 12.6482  |
| ENSMUSGI | 1363.653  | 1285.893 | 769.8388 | 966.3801 | 0.53947  | 0.000542 | 0.008434 | Zc3h4     | chr7  | + | 16401196 | 16437694 | 6049  | protein_co | zinc_finger  | 1508  | 1329  | 756   | 873   | 9.692614 | 9.100595 | 5.285745 | 6.870073 |
| ENSMUSGI | 9752.655  | 11408.55 | 7805.31  | 8362.01  | 0.36133  | 0.003521 | 0.031155 | Ptk2b     | chr14 | - | 66153257 | 66281052 | 4034  | protein_co | PTK2_prot    | 10785 | 11791 | 7665  | 7554  | 103.9459 | 121.0718 | 80.36081 | 89.13983 |
| ENSMUSGI | 5917.605  | 6025.991 | 4412.317 | 4794.263 | 0.35198  | 0.002879 | 0.026923 | Arhgef12  | chr9  | - | 42963842 | 43105718 | 10483 | protein_co | Rho_guani    | 6544  | 6228  | 4333  | 4331  | 24.27062 | 24.60885 | 17.4812  | 19.66678 |
| ENSMUSGI | 1782.335  | 1187.201 | 790.2049 | 815.8329 | 0.75227  | 1.66E-05 | 0.000748 | Kcnh7     | chr2  | - | 62693414 | 63184287 | 13321 | protein_co | potassium    | 1971  | 1227  | 776   | 737   | 5.752717 | 3.815365 | 2.463729 | 2.63367  |
| ENSMUSGI | 528.0992  | 831.1378 | 261.7044 | 494.8132 | 0.60862  | 0.005357 | 0.041604 | Ntng1     | chr3  | - | 1.1E+08  | 1.1E+08  | 5587  | protein_co | netrin_G1    | 584   | 859   | 257   | 447   | 4.064034 | 6.368584 | 1.945461 | 3.808549 |
| ENSMUSGI | 782.2018  | 894.0295 | 511.1892 | 512.5246 | 0.61999  | 0.000138 | 0.003247 | Zfp462    | chr4  | + | 54945048 | 55083563 | 10465 | protein_co | zinc_finger  | 865   | 924   | 502   | 463   | 3.213661 | 3.657304 | 2.028769 | 2.106068 |
| ENSMUSGI | 2329.424  | 2185.728 | 1563.099 | 1761.181 | 0.40508  | 0.002863 | 0.025361 | Pcnx12    | chr8  | - | 1.26E+08 | 1.26E+08 | 7236  | protein_co | pepcanex-lll | 2576  | 2259  | 1535  | 1591  | 13.8411  | 12.93141 | 8.971764 | 10.46652 |
| ENSMUSGI | 4485.226  | 4557.228 | 3103.794 | 3600.956 | 0.40007  | 0.001603 | 0.017931 | Ap2a1     | chr7  | - | 44900373 | 44929496 | 3449  | protein_co | adaptor-re   | 4960  | 4710  | 3048  | 3253  | 55.91285 | 56.56608 | 37.37574 | 44.89744 |
| ENSMUSGI | 2025.586  | 1857.724 | 1525.421 | 1226.517 | 0.4456   | 0.002553 | 0.024792 | Kcnd2     | chr6  | + | 21215503 | 21729805 | 5152  | protein_co | potassium    | 2240  | 1920  | 1498  | 1108  | 16.90423 | 15.43667 | 12.29714 | 10.23752 |
| ENSMUSGI | 2329.424  | 2185.728 | 1563.099 | 1761.181 | 0.40508  | 0.002863 | 0.025361 | Pcnx12    | chr8  | - | 15892537 | 17535586 | 14182 | protein_co | CUB_and_     | 808   | 1015  | 496   | 348   | 2.215119 | 2.964537 | 1.47915  | 1.16808  |
| ENSMUSGI | 1217.16   | 1420.384 | 855.3764 | 1027.263 | 0.43008  | 0.005837 | 0.043851 | Taok3     | chr5  | + | 1.17E+08 | 1.17E+08 | 4467  | protein_co | TAO_kinas    | 1346  | 1468  | 840   | 928   | 11.71527 | 13.61252 | 7.953007 | 9.889236 |
| ENSMUSGI | 1773.292  | 2106.388 | 1431.737 | 1350.497 | 0.43414  | 0.002288 | 0.022997 | Zcchc14   | chr8  | - | 1.22E+08 | 1.22E+08 | 7444  | protein_co | zinc_finger  | 1961  | 2177  | 1406  | 1220  | 10.24223 | 12.1138  | 7.988164 | 7.801609 |
| ENSMUSGI | 978.4304  | 1157.201 | 554.9763 | 705.1364 | 0.65604  | 9.50E-05 | 0.002555 | Ksr2      | chr5  | + | 1.17E+08 | 1.18E+08 | 13125 | protein_co | kinase_suf   | 1082  | 1196  | 545   | 637   | 3.20517  | 3.774505 | 1.756165 | 2.310313 |
| ENSMUSGI | 3240.033  | 3534.513 | 1926.633 | 1685.907 | 0.83334  | 3.49E-10 | 2.25E-07 | Pclo      | chr5  | + | 14514918 | 14860184 | 17057 | protein_co | piccolo_pi   | 3583  | 3653  | 1892  | 1523  | 8.16709  | 8.871058 | 4.691228 | 4.250382 |
| ENSMUSGI | 5302.695  | 5091.324 | 3420.487 | 3335.247 | 0.58075  | 8.17E-07 | 7.55E-05 | Akap6     | chr12 | + | 52699383 | 53151015 | 10263 | protein_co | Ca_kinase_l  | 5864  | 5262  | 3359  | 3022  | 22.21482 | 21.23477 | 13.84215 | 14.01686 |
| ENSMUSGI | 14185.423 | 11601.1  | 9737.035 | 9856.412 | 0.36714  | 0.003863 | 0.033153 | Kalrn     | chr16 | - | 33974258 | 34573532 | 8940  | protein_co | calirin_Rhc  | 15687 | 11990 | 9562  | 8904  | 68.22217 | 55.55332 | 45.23548 | 47.41092 |
| ENSMUSGI | 993.8032  | 1379.747 | 726.0516 | 666.3927 | 0.65773  | 0.000121 | 0.002985 | Bod1l     | chr5  | - | 41787542 | 41844168 | 10389 | protein_co | bioorientati | 1099  | 1426  | 713   | 602   | 4.11289  | 5.685572 | 2.902577 | 2.758376 |
| ENSMUSGI | 3644.246  | 3840.263 | 2546.781 | 2624.613 | 0.49744  | 4.55E-05 | 0.001536 | Myt1l     | chr12 | + | 29528384 | 29923209 | 7198  | protein_co | myelin_tra   | 4030  | 3969  | 2501  | 2371  | 21.76789 | 22.84008 | 14.69501 | 15.68016 |
| ENSMUSGI | 970.678   | 1075.689 | 4425.639 | 2791.175 | 3204.662 | 0.44788  | 0.000611 | Umtk3     | chr7  | + | 45783738 | 45804144 | 5051  | protein_co | lemur_tyrc   | 4391  | 4574  | 2741  | 2895  | 33.79942 | 37.51001 | 22.95029 | 27.83262 |
| ENSMUSGI | 1728.078  | 2004.793 | 1174.106 | 1343.855 | 0.51189  | 0.000429 | 0.007263 | Rai1      | chr11 | + | 60105013 | 60199197 | 7348  | protein_co | retinoic_ac  | 1911  | 2072  | 1153  | 1214  | 10.11148 | 11.68016 | 6.636333 | 7.864665 |
| ENSMUSGI | 1249.714  | 1430.06  | 709.7587 | 969.7009 | 0.58245  | 0.000492 | 0.008021 | ErbB4     | chr1  | - | 68032186 | 69108059 | 12037 | protein_co | cv-erb-a_er  | 1382  | 1478  | 697   | 876   | 4.463885 | 5.086096 | 2.448965 | 3.464308 |
| ENSMUSGI | 2325.807  | 2971.39  | 1602.812 | 1815.422 | 0.56605  | 0.000142 | 0.003298 | Rapgef2   | chr3  | + | 79062516 | 79181340 | 6573  | protein_co | Rap_guani    | 2572  | 3071  | 1574  | 1640  | 15.21355 | 19.35283 | 10.12766 | 11.87711 |
| ENSMUSGI | 4175.963  | 3782.209 | 2415.42  | 3020.906 | 0.50017  | 0.000347 | 0.006231 | Opclm     | chr9  | + | 27790775 | 28925410 | 6676  | protein_co | opioid_bin   | 4618  | 3909  | 2372  | 2729  | 26.89433 | 24.25368 | 15.0268  | 19.45888 |
| ENSMUSGI | 19049.55  | 18328.57 | 14682.94 | 13705.33 | 0.37469  | 0.000807 | 0.011219 | Kif1b     | chr4  | - | 1.49E+08 | 1.49E+08 | 10233 | protein_co | kinasin_fai  | 21066 | 18943 | 14419 | 12381 | 80.03912 | 76.6786  | 59.59368 | 57.59482 |
| ENSMUSGI | 1538.179  | 1726.135 | 852.3215 | 1112.499 | 0.64486  | 4.55E-05 | 0.001536 | Kcnma1    | chr14 | - | 23289431 | 24004859 | 4990  | protein_co | potassium    | 1701  | 1784  | 837   | 1005  | 13.25339 | 14.8089  | 7.094029 | 9.587298 |
| ENSMUSGI | 986.5689  | 955.9536 | 650.697  | 604.4026 | 0.55886  | 0.000284 | 0.005496 | Sorcs3    | chr19 | + | 48206025 | 48805505 | 5634  | protein_co | sorilin-rel  | 1091  | 988   | 639   | 546   | 7.528892 | 7.263877 | 4.796805 | 4.613245 |
| ENSMUSGI | 894.3324  | 1010.137 | 509.1526 | 508.0967 | 0.79361  | 6.57E-07 | 6.64E-05 | D630045J1 | chr6  | - | 38123174 | 38254009 | 10968 | protein_co | RIKEN_cdD    | 989   | 1044  | 500   | 459   | 3.505839 | 3.94277  | 1.928016 | 1.992122 |
| ENSMUSGI | 453.044   | 449.9174 | 275.9607 | 273.4202 | 0.59207  | 0.001327 | 0.016042 | Nup98     | chr7  | - | 1.02E+08 | 1.02E+08 | 4051  | protein_co | nucleopori   | 501   | 465   | 271   | 247   | 4.808379 | 4.754656 | 2.829274 | 2.902455 |
| ENSMUSGI | 3457.965  | 3620.626 | 2413.383 | 2335.695 | 0.53645  | 1.23E-07 | 0.006613 | Chd4      | chr6  | + | 1.25E+08 | 1.25E+08 | 6697  | protein_co | chromodo     | 3824  | 3742  | 2370  | 2110  | 22.2004  | 23.14472 | 14.86215 | 14.99798 |
| ENSMUSGI | 1476.688  | 1502.627 | 1031.543 | 1094.788 | 0.44295  | 0.00147  | 0.017039 | Nlgn1     | chr3  | - | 25431811 | 26133734 | 4359  | protein_co | neuroiligin  | 1633  | 1553  | 1013  | 989   | 14.5654  | 14.75751 | 9.828576 | 10.80041 |
| ENSMUSGI | 640.2299  | 840.8134 | 341.1323 | 458.2833 | 0.72563  | 0.000121 | 0.002985 | Srrm4     | chr5  | - | 1.16E+08 | 1.17E+08 | 7476  | protein_co | serine/argi  | 708   | 869   | 335   | 414   | 3.682028 | 4.814807 | 1.89515  | 2.636099 |
| ENSMUSGI | 730.6578  | 1173.098 | 713.0949 | 766.4053 | 0.69485  | 0.000687 | 0.010018 | BC068157  | chr8  | - | 4209543  | 4217459  | 4616  | protein_co | WDNA_seqi    | 520   | 737   | 262   | 331   | 4.379865 | 6.61348  | 2.40051  | 3.413445 |
| ENSMUSGI | 1355.515  | 1178.493 | 892.0354 | 876.7159 | 0.46484  | 0.001763 | 0.019159 | Paqr9     | chr9  | + | 95559657 | 95568023 | 8367  | protein_co | progesterin  | 1499  | 1218  | 876   | 792   | 6.965544 | 6.029841 | 4.427947 | 4.505947 |
| ENSMUSGI | 1117.689  | 964.6617 | 640.514  | 667.4996 | 0.59264  | 0.000152 | 0.003447 | Cntn4     | chr6  | + | 1.06E+08 | 1.07E+08 | 5262  | protein_co | contactin_   | 1236  | 997   | 629   | 603   | 9.132524 | 7.848247 | 5.055543 | 5.45503  |
| ENSMUSGI | 1953.244  | 2109.29  | 1074.312 | 1222.089 | 0.56251  | 0.00011  | 0.002838 | Numa1     | chr7  | + | 1.18E+08 | 1.19E+08 | 10265 | protein_co | CLIP_assoc   | 2160  | 2180  | 1055  | 1104  | 8.181218 | 8.796824 | 4.346719 | 5.119657 |
| ENSMUSGI | 2359.265  | 2733.369 | 1459.231 | 1396.989 | 0.76216  | 2.42E-08 | 5.00E-06 | Ubr4      | chr4  | + | 1.39E+08 | 1.39E+08 | 15928 | protein_co | cubiquitin_f | 2609  | 2825  | 1433  | 1262  | 6.368483 | 7.346586 | 3.804985 | 3.771628 |
| ENSMUSGI | 2286.019  | 1901.264 | 1397.115 | 1374.85  | 0.53935  | 0.000145 | 0.003352 | Kndc1     | chr7  | + | 1.4E+08  | 1.4E+08  | 7299  | protein_co | kinase_noi   | 2528  | 1965  | 1372  | 1242  | 13.46595 | 11.15135 | 7.949847 | 8.100073 |
| ENSMUSGI | 1549.031  | 1683.562 | 971.4632 | 1125.783 | 0.56251  | 0.00011  | 0.002838 | Numa1     | chr7  | + | 1.02E+08 | 1.02E+08 | 7153  | protein_co | nuclear_m    | 1713  | 1740  | 954   | 1017  | 9.310914 | 10.07603 | 5.640637 | 6.786048 |
| ENSMUSGI | 3482.38   | 3861.549 | 2420.512 | 2192.897 | 0.61927  | 1.67E-06 | 0.000135 | Nrxn3     | chr12 | + | 88722876 | 90334935 | 7922  | protein_co | neurexin_l   | 3851  | 3991  | 2377  | 1981  | 18.9     | 20.86773 | 12.69002 | 11.90366 |
| ENSMUSGI | 366.2332  | 371.5447 | 214.8624 | 221.3929 | 0.60697  | 0        |          |           |       |   |          |          |       |            |              |       |       |       |       |          |          |          |          |
