# Supplementary material
Source: PubMed Central journal article supplement (PMC9023069)
Supplement: NIHMS1792121-supplement-1792121_Sup_file_2.pdf [file NIHMS1792121-supplement-1792121_Sup_file_2.pdf]

| Gene_ID         | CT6      | CT7      | CT5      | CT8      | log2FoldCl | pvalue   | padj     | GeneName | Chrom | Strand | Start    | End      | GeneLengt | GeneType                | GeneDescr | CT6_readc | CT7_readc | CT5_readc | CT8_readc | CT6_fpk  | CT7_fpk  | CT5_fpk  | CT8_fpk  |
|-----------------|----------|----------|----------|----------|------------|----------|----------|----------|-------|--------|----------|----------|-----------|-------------------------|-----------|-----------|-----------|-----------|-----------|----------|----------|----------|----------|
| ENSMUSG1779.622 | 1768.708 | 2628.246 | 2304.7   |          | -0.43678   | 0.001032 | 0.013173 | Cox5a    | chr9  | +      | 57521232 | 57532424 | 690       | protein_co_cytochrom    |           | 1968      | 1828      | 2581      | 2082      | 110.8917 | 109.7376 | 158.2002 | 143.6357 |
| ENSMUSG1779.622 | 2465.97  | 2146.058 | 3439.835 | 2966.665 | -0.43311   | 0.001553 | 0.017542 | Sdhb     | chr9  | -      | 50596338 | 50603849 | 1287      | protein_co_succinate_   |           | 2727      | 2218      | 3378      | 2680      | 82.38151 | 71.38572 | 111.0067 | 99.12586 |
| ENSMUSG1779.622 | 878.0554 | 782.7596 | 1289.174 | 1073.756 | -0.44921   | 0.004108 | 0.034763 | Btdb17   | chr11 | -      | 1.15E+08 | 1.15E+08 | 3020      | protein_co_BT_          | (POZ)     | 971       | 809       | 1266      | 970       | 12.50073 | 11.09609 | 17.72943 | 15.28958 |
| ENSMUSG1779.622 | 6877.95  | 6428.498 | 10041.51 | 8312.197 | -0.42911   | 0.000829 | 0.011458 | Atp5f1   | chr3  | -      | 1.06E+08 | 1.06E+08 | 2527      | protein_co_ATP_synth    |           | 7606      | 6644      | 9861      | 7509      | 117.0238 | 108.9062 | 165.0379 | 141.4515 |
| ENSMUSG1779.622 | 10493.26 | 10786.41 | 17933.37 | 13447.41 | -0.5104    | 0.000236 | 0.004794 | Rpl13    | chr8  | +      | 1.23E+08 | 1.23E+08 | 1969      | protein_co_ribosomal_   |           | 11604     | 11148     | 17611     | 12148     | 229.1317 | 234.5199 | 378.2739 | 293.6904 |
| ENSMUSG1779.622 | 1354.611 | 1319.758 | 2096.69  | 1826.492 | -0.50386   | 0.000275 | 0.005372 | Tpd52l2  | chr2  | +      | 1.81E+08 | 1.82E+08 | 3603      | protein_co_tumor_prc    |           | 1498      | 1364      | 2059      | 1650      | 16.16481 | 15.68117 | 24.16908 | 21.79969 |
| ENSMUSG1779.622 | 343.6262 | 331.8746 | 572.2875 | 522.4873 | -0.58734   | 0.000909 | 0.012187 | S100a6   | chr3  | +      | 90612894 | 90614414 | 719       | protein_co_S100_calci   |           | 380       | 343       | 562       | 472       | 20.54839 | 19.7603  | 33.05791 | 31.24955 |
| ENSMUSG1779.622 | 908.8009 | 947.2455 | 1527.458 | 1209.912 | -0.49625   | 0.001418 | 0.01662  | Nhp2     | chr11 | +      | 51619735 | 51623714 | 1042      | protein_co_NHP2_ribc    |           | 1005      | 979       | 1500      | 1093      | 37.49916 | 38.91736 | 60.88237 | 49.93248 |
| ENSMUSG1779.622 | 2626.932 | 2570.818 | 3498.897 | 3237.871 | -0.34818   | 0.004946 | 0.039347 | Poldip2  | chr11 | +      | 78512193 | 78522736 | 2054      | protein_co_polymeras    |           | 2905      | 2657      | 3436      | 2925      | 54.98812 | 53.58207 | 70.74907 | 67.78852 |
| ENSMUSG1779.622 | 1152.956 | 1062.386 | 1897.103 | 1403.631 | -0.50446   | 0.00163  | 0.018119 | Ift20    | chr11 | +      | 78536361 | 78541737 | 1167      | protein_co_intraflagell |           | 1275      | 1098      | 1863      | 1268      | 42.47785 | 38.97264 | 67.51652 | 51.72245 |
| ENSMUSG1779.622 | 3775.367 | 4314.369 | 7112.862 | 5135.209 | -0.53382   | 0.000414 | 0.00709  | Pfdn5    | chr15 | +      | 1.02E+08 | 1.02E+08 | 1062      | protein_co_prefoldin_   |           | 4175      | 4459      | 6985      | 4639      | 152.8464 | 173.9167 | 278.1698 | 207.9364 |
| ENSMUSG1779.622 | 2763.478 | 3313.908 | 4462.214 | 3834.525 | -0.40959   | 0.003041 | 0.028159 | Rnd2     | chr11 | +      | 1.01E+08 | 1.01E+08 | 1578      | protein_co_Rho_famil    |           | 3056      | 3425      | 4382      | 3464      | 75.29559 | 89.90461 | 117.4447 | 104.4965 |
| ENSMUSG1779.622 | 1864.624 | 2254.425 | 2998.909 | 2637.897 | -0.41069   | 0.003694 | 0.032102 | Cyp5l1   | chr5  | -      | 4081145  | 4104746  | 3931      | protein_co_cytochrom    |           | 2062      | 2330      | 2945      | 2383      | 20.3943  | 24.55168 | 31.68475 | 28.85704 |
| ENSMUSG1779.622 | 603.1544 | 611.5007 | 939.8957 | 792.5866 | -0.44789   | 0.005624 | 0.04277  | Eef1e1   | chr13 | -      | 38645698 | 38659028 | 1032      | protein_co_eukaryotic   |           | 667       | 632       | 923       | 716       | 25.12866 | 25.3668  | 37.82597 | 33.02661 |
| ENSMUSG1779.622 | 900.6624 | 848.5539 | 1459.231 | 1192.201 | -0.53261   | 0.000541 | 0.008434 | Ssr4     | chrX  | +      | 73787028 | 73790830 | 2568      | protein_co_signal_seq   |           | 996       | 877       | 1433      | 1077      | 15.07952 | 14.14598 | 23.60039 | 19.96418 |
| ENSMUSG1779.622 | 322.8278 | 199.3183 | 422.5967 | 453.8555 | -0.56638   | 0.006476 | 0.047221 | Trappc6a | chr7  | +      | 19508670 | 19516145 | 955       | protein_co_trafficking  |           | 357       | 206       | 415       | 410       | 14.5341  | 8.934952 | 18.37861 | 20.43672 |
| ENSMUSG1779.622 | 908.8009 | 947.2455 | 1527.458 | 1209.912 | -0.49625   | 0.001418 | 0.01662  | Nhp2     | chr11 | +      | 51619735 | 51623714 | 1042      | protein_co_NHP2_ribc    |           | 1005      | 979       | 1500      | 1093      | 37.49916 | 38.91736 | 60.88237 | 49.93248 |
| ENSMUSG1779.622 | 447.6184 | 419.9229 | 725.0333 | 570.0867 | -0.48674   | 0.006189 | 0.045709 | 2310045N | chr8  | +      | 70139499 | 70167488 | 1337      | protein_co_RIKEN_cDN    |           | 495       | 434       | 712       | 515       | 14.39451 | 13.4458  | 22.5225  | 18.33608 |
| ENSMUSG1779.622 | 2034.629 | 2034.788 | 2917.444 | 2669.998 | -0.42354   | 0.000899 | 0.012111 | Ndufa11  | chr17 | +      | 56717762 | 56724248 | 2661      | protein_co_NADH_def     |           | 2250      | 2103      | 2865      | 2412      | 32.87463 | 32.73579 | 45.53526 | 43.14825 |
| ENSMUSG1779.622 | 1827.755 | 1944.804 | 2953.085 | 2557.088 | -0.5016    | 0.000184 | 0.003984 | Abhd3    | chr18 | -      | 10644411 | 10706771 | 1962      | protein_co_abhydrola    |           | 2021      | 2010      | 2900      | 2310      | 40.04889 | 42.43512 | 62.51252 | 56.04588 |
| ENSMUSG1779.622 | 102.1836 | 167.3886 | 292.2536 | 246.8531 | -0.68982   | 0.002186 | 0.022326 | Mien1    | chr11 | -      | 98437708 | 98438991 | 747       | protein_co_migration_   |           | 113       | 173       | 287       | 223       | 5.881404 | 9.592987 | 16.2491  | 14.21068 |
| ENSMUSG1779.622 | 1115.881 | 1182.364 | 1762.686 | 1530.932 | -0.46992   | 0.001014 | 0.013018 | Clpp     | chr17 | +      | 56990264 | 56996371 | 1207      | protein_co_caseinolyti  |           | 1234      | 1222      | 1731      | 1383      | 39.74944 | 41.93651 | 60.65377 | 54.54383 |
| ENSMUSG1779.622 | 1255.14  | 1228.807 | 1807.492 | 1693.656 | -0.45324   | 0.000833 | 0.011473 | Naa20    | chr2  | +      | 1.46E+08 | 1.46E+08 | 1883      | protein_co_N(alpha)-a   |           | 1388      | 1270      | 1775      | 1530      | 28.65909 | 27.93713 | 39.86723 | 38.6787  |
| ENSMUSG1779.622 | 1165.616 | 1231.709 | 1917.469 | 1745.683 | -0.55814   | 5.11E-05 | 0.001634 | Mea1     | chr17 | +      | 46681137 | 46683105 | 840       | protein_co_male_enh     |           | 1289      | 1273      | 1883      | 1577      | 59.66186 | 62.77367 | 94.80671 | 89.36822 |
| ENSMUSG1779.622 | 61254.09 | 60783.36 | 89823.69 | 92935.21 | -0.55311   | 2.20E-07 | 2.74E-05 | Apoe     | chr7  | -      | 19696109 | 19699166 | 1386      | protein_co_apolipoprc   |           | 67738     | 62821     | 88209     | 83955     | 1900.169 | 1877.457 | 2691.644 | 2883.461 |
| ENSMUSG1779.622 | 5674.354 | 5299.35  | 7620.996 | 7187.521 | -0.40574   | 0.000526 | 0.008357 | Atp5d    | chr10 | +      | 80138632 | 80145818 | 1410      | protein_co_ATP_synth    |           | 6275      | 5477      | 7484      | 6493      | 173.0286 | 160.8985 | 228.4826 | 219.2083 |
| ENSMUSG1779.622 | 5880.53  | 5281.934 | 7884.919 | 6950.63  | -0.45256   | 0.000942 | 0.012485 | Abhd17a  | chr10 | -      | 80583654 | 80590341 | 1529      | protein_co_abhydrola    |           | 6503      | 5459      | 8627      | 6279      | 165.3596 | 147.8884 | 234.2724 | 195.4851 |
| ENSMUSG1779.622 | 5129.073 | 4156.656 | 6334.877 | 6048.454 | -0.3819    | 0.003883 | 0.033273 | Rabac1   | chr7  | -      | 24969750 | 24972728 | 875       | protein_co_Rab_acc      |           | 5672      | 4296      | 6221      | 5464      | 252.0295 | 203.3689 | 300.6908 | 297.2579 |
| ENSMUSG1779.622 | 4452.672 | 4959.735 | 8230.961 | 6128.156 | -0.54928   | 0.000155 | 0.003513 | Rps11    | chr7  | -      | 45122388 | 45124389 | 602       | protein_co_ribosomal    |           | 4924      | 5126      | 8083      | 5536      | 318.0129 | 352.7041 | 567.8637 | 437.7542 |
| ENSMUSG1779.622 | 770.4461 | 734.3813 | 1211.783 | 970.8079 | -0.47073   | 0.003238 | 0.029403 | Timm50   | chr7  | -      | 28305516 | 28312072 | 1515      | protein_co_translocasi  |           | 852       | 759       | 1190      | 877       | 21.86503 | 20.75188 | 33.22021 | 27.5561  |
| ENSMUSG1779.622 | 931.4079 | 927.8942 | 1377.767 | 1287.4   | -0.47023   | 0.000985 | 0.012799 | Dgcr6    | chr16 | +      | 18052860 | 18071632 | 1415      | protein_co_DiGeorge     |           | 1030      | 959       | 1353      | 1163      | 28.30114 | 28.07311 | 40.43984 | 39.12497 |
| ENSMUSG1779.622 | 1222.586 | 1137.856 | 1773.888 | 1642.735 | -0.48608   | 0.000451 | 0.007487 | Lin7b    | chr7  | -      | 45367891 | 45370583 | 735       | protein_co_lin-7_hom    |           | 1352      | 1176      | 1742      | 1484      | 71.51753 | 66.27479 | 100.2372 | 96.11192 |
| ENSMUSG1779.622 | 581.4517 | 543.7712 | 852.3215 | 757.1638 | -0.45106   | 0.005341 | 0.041579 | Fam162a  | chr16 | -      | 36043844 | 36071515 | 635       | protein_co_family_wit   |           | 643       | 562       | 837       | 684       | 39.36955 | 36.65987 | 55.74678 | 51.27588 |
| ENSMUSG1779.622 | 9455.347 | 8661.636 | 14186.01 | 11377.38 | -0.45703   | 0.00054  | 0.008432 | Rpl8     | chr15 | +      | 76904071 | 76906318 | 862       | protein_co_ribosomal    |           | 10456     | 8952      | 13931     | 10278     | 471.6083 | 430.1711 | 683.5071 | 567.5865 |
| ENSMUSG1779.622 | 2727.307 | 3118.46  | 4931.652 | 3856.664 | -0.53155   | 0.000219 | 0.004559 | Gstm5    | chr3  | +      | 1.08E+08 | 1.08E+08 | 1083      | protein_co_glutathion   |           | 3016      | 3223      | 4843      | 3484      | 108.2745 | 123.2708 | 189.1272 | 153.1371 |
| ENSMUSG1779.622 | 1359.132 | 1252.996 | 1947     | 1599.564 | -0.39666   | 0.006914 | 0.034133 | Cwc15    | chr9  | +      | 14500617 | 14510577 | 1111      | protein_co_CWC15_hc     |           | 1503      | 1295      | 1912      | 1445      | 52.59786 | 48.28187 | 72.785   | 61.91338 |
| ENSMUSG1779.622 | 610.3887 | 506.0362 | 809.5527 | 820.2607 | -0.47312   | 0.004139 | 0.034885 | Emg1     | chr6  | -      | 1.25E+08 | 1.25E+08 | 1074      | protein_co_EMG1_nuc     |           | 675       | 523       | 795       | 741       | 24.43558 | 20.17092 | 31.30624 | 32.84314 |
| ENSMUSG1779.622 | 2688.423 | 2509.862 | 4174.033 | 3501.329 | -0.51624   | 0.00011  | 0.002838 | Atp6v1f  | chr6  | +      | 29467718 | 29470512 | 806       | protein_co_ATPase_H-    |           | 2973      | 2594      | 4099      | 3163      | 143.4112 | 133.3102 | 215.0854 | 186.8077 |
| ENSMUSG1779.622 | 6079.471 | 6635.556 | 8458.043 | 9702.544 | -0.47862   | 0.000108 | 0.002816 | Sst      | chr16 | -      | 23889581 | 23890844 | 599       | protein_co_family_tosta |           | 6723      | 6858      | 8306      | 8765      | 436.3746 | 474.2409 | 586.4529 | 696.5556 |
| ENSMUSG1779.622 | 840.0757 | 878.5484 | 1601.794 | 1044.975 | -0.52526   | 0.003056 | 0.028248 | Etfb     | chr7  | +      | 43444108 | 43457800 | 868       | protein_co_electron_t   |           | 929       | 908       | 1573      | 944       | 41.61206 | 43.33058 | 76.6438  | 51.77057 |
| ENSMUSG1779.622 | 1706.375 | 1573.26  | 2436.804 | 2052.312 | -0.41157   | 0.00336  | 0.030221 | Polr2e   | chr10 | -      | 80035949 | 80039795 | 2403      | protein_co_polymeras    |           | 1887      | 1626      | 2393      | 1854      | 30.53102 | 28.0282  | 42.11695 | 36.7271  |
| ENSMUSG1779.622 | 6286.551 | 6659.745 | 9066.99  |          |            |          |          |          |       |        |          |          |           |                         |           |           |           |           |           |          |          |          |          |

|          |          |          |          |          |          |          |          |          |       |   |          |          |      |                        |       |       |       |       |          |          |          |          |
|----------|----------|----------|----------|----------|----------|----------|----------|----------|-------|---|----------|----------|------|------------------------|-------|-------|-------|-------|----------|----------|----------|----------|
| ENSMUSGI | 2791.511 | 3174.579 | 4890.92  | 4364.761 | -0.58498 | 6.49E-06 | 0.000368 | Hint1    | chr11 | + | 54866383 | 54870501 | 636  | protein_cohistidine_t  | 3087  | 3281  | 4803  | 3943  | 188.7134 | 213.6867 | 319.3916 | 295.1212 |
| ENSMUSGI | 6034.257 | 5963.099 | 9887.744 | 7607.06  | -0.49702 | 0.000288 | 0.000547 | Gnb2l1   | chr11 | + | 48800332 | 48806434 | 4456 | protein_coguanine_n    | 6673  | 6163  | 9710  | 6872  | 58.22361 | 57.28954 | 92.15992 | 73.41227 |
| ENSMUSGI | 1587.915 | 1568.422 | 2333.956 | 2272.598 | -0.50419 | 8.96E-05 | 0.002461 | Sar1b    | chr11 | + | 51763687 | 51791925 | 1201 | protein_coSAR1_gene    | 1756  | 1621  | 2292  | 2053  | 56.84662 | 55.90728 | 80.71228 | 81.37231 |
| ENSMUSGI | 4609.113 | 3956.371 | 6238.138 | 5182.808 | -0.37958 | 0.005306 | 0.041343 | Arf5     | chr6  | + | 28423560 | 28426602 | 1116 | protein_coADP-ribosy   | 5097  | 4089  | 6126  | 4682  | 177.5716 | 151.7684 | 232.1565 | 199.7091 |
| ENSMUSGI | 2819.544 | 2948.169 | 4896.012 | 3917.548 | -0.55881 | 4.54E-05 | 0.001536 | Guk1     | chr11 | - | 59183875 | 59192212 | 1078 | protein_coguanylate    | 3118  | 3047  | 4808  | 3539  | 112.4555 | 117.0798 | 188.6313 | 156.2761 |
| ENSMUSGI | 3952.606 | 3837.36  | 6637.313 | 4972.485 | -0.52071 | 0.000275 | 0.005375 | Rps27a   | chr11 | - | 29545846 | 29548109 | 928  | protein_cobiosomal     | 4371  | 3966  | 6518  | 4492  | 183.1285 | 177.0244 | 297.0533 | 230.4212 |
| ENSMUSGI | 651.9855 | 616.3385 | 1161.886 | 889.9995 | -0.5996  | 0.000333 | 0.006029 | Mrps24   | chr11 | - | 5703983  | 5715680  | 995  | protein_co mitochond   | 721   | 637   | 1141  | 804   | 28.17315 | 26.51824 | 48.49876 | 38.46482 |
| ENSMUSGI | 1040.826 | 975.3049 | 1567.172 | 1281.865 | -0.44478 | 0.003346 | 0.030174 | Supt4a   | chr11 | + | 87737552 | 87743623 | 854  | protein_cosuppressor   | 1151  | 1008  | 1539  | 1158  | 52.40113 | 48.89124 | 76.21646 | 64.54779 |
| ENSMUSGI | 547.0891 | 596.0196 | 982.6645 | 733.9175 | -0.49896 | 0.004132 | 0.034885 | Znhit3   | chr11 | - | 84910950 | 84916366 | 998  | protein_co zinc_finger | 605   | 616   | 1639  | 663   | 23.56937 | 25.56693 | 40.89449 | 31.62377 |
| ENSMUSGI | 3644.246 | 3773.501 | 4755.485 | 4789.836 | -0.34129 | 0.003638 | 0.031837 | Ntsr2    | chr12 | + | 16653470 | 16660236 | 1547 | protein_co neurotensi  | 4030  | 3900  | 4670  | 4327  | 101.2833 | 104.4246 | 127.6717 | 133.1457 |
| ENSMUSGI | 4742.042 | 4410.158 | 6240.174 | 5646.626 | -0.35196 | 0.003803 | 0.032681 | Psmc5    | chr11 | + | 1.06E+08 | 1.06E+08 | 1394 | protein_coprotease_(   | 5244  | 4558  | 6128  | 5101  | 146.2592 | 135.4378 | 185.9191 | 174.19   |
| ENSMUSGI | 2067.183 | 1995.118 | 2813.577 | 2629.041 | -0.39104 | 0.002079 | 0.021401 | Hn1      | chr11 | - | 1.15E+08 | 1.16E+08 | 1375 | protein_co hematod     | 2286  | 2062  | 2763  | 2375  | 64.63931 | 62.11755 | 84.98577 | 82.22268 |
| ENSMUSGI | 1573.446 | 1618.735 | 2107.892 | 2061.168 | -0.35553 | 0.006198 | 0.045709 | Fkbp3    | chr12 | - | 65062436 | 65073944 | 947  | protein_co FK506_bin   | 1740  | 1673  | 2070  | 1862  | 71.43687 | 73.17696 | 92.44606 | 93.59667 |
| ENSMUSGI | 2118.727 | 2063.815 | 3043.714 | 2769.625 | -0.43975 | 0.000574 | 0.008833 | Psmab    | chr12 | + | 55384222 | 55418454 | 1042 | protein_coproteasom    | 2343  | 2133  | 2989  | 2502  | 87.42341 | 84.79134 | 121.3183 | 114.3011 |
| ENSMUSGI | 3920.052 | 4004.749 | 6238.138 | 4805.333 | -0.4357  | 0.00178  | 0.019229 | Vti1b    | chr12 | - | 79156017 | 79172667 | 1490 | protein_covesicle_tra  | 4335  | 4139  | 6126  | 4341  | 113.1165 | 115.0635 | 173.8837 | 138.6865 |
| ENSMUSGI | 391.553  | 528.2901 | 764.7472 | 711.7782 | -0.57353 | 0.001341 | 0.016113 | Isca2    | chr12 | + | 84773270 | 84775089 | 868  | protein_co iron-sulfur | 433   | 546   | 751   | 643   | 19.39507 | 26.05561 | 36.59218 | 35.26322 |
| ENSMUSGI | 1665.683 | 1633.249 | 2435.786 | 2025.745 | -0.39617 | 0.004622 | 0.037421 | Npc2     | chr12 | - | 84754560 | 84773112 | 3261 | protein_co Niemann-F   | 1842  | 1688  | 2392  | 1830  | 21.9615  | 21.44125 | 31.02262 | 26.71351 |
| ENSMUSGI | 509.1094 | 475.0741 | 933.7859 | 691.8528 | -0.61075 | 0.00056  | 0.008651 | Zfyve21  | chr12 | + | 1.12E+08 | 1.12E+08 | 1310 | protein_co vesicle     | 563   | 491   | 917   | 625   | 16.70938 | 15.62755 | 29.60527 | 22.71117 |
| ENSMUSGI | 1169.233 | 1404.903 | 2508.086 | 2166.33  | -0.77439 | 1.24E-07 | 1.73E-05 | 2010107E | chr12 | - | 1.12E+08 | 1.12E+08 | 365  | protein_co RIKEN_cd    | 1293  | 1452  | 2463  | 1957  | 137.7301 | 164.7791 | 285.3905 | 255.2282 |
| ENSMUSGI | 595.0159 | 594.0845 | 906.2917 | 975.2358 | -0.58599 | 0.000157 | 0.003534 | Uqcrc    | chr13 | - | 66900617 | 66905378 | 565  | protein_co ubiquinol-r | 658   | 614   | 890   | 881   | 45.2794  | 45.10407 | 66.62076 | 74.22636 |
| ENSMUSGI | 1454.081 | 1342.012 | 2208.704 | 1699.191 | -0.42999 | 0.004571 | 0.038278 | Pdcd6    | chr13 | - | 74303121 | 74317326 | 1524 | protein_co program     | 1608  | 1387  | 2169  | 1535  | 41.0227  | 37.69814 | 60.19253 | 47.94619 |
| ENSMUSGI | 937.7379 | 788.5649 | 1687.332 | 1444.589 | -0.76259 | 7.10E-07 | 7.05E-05 | Ndufs6   | chr13 | - | 73319874 | 73328542 | 568  | protein_co NADH_def    | 1037  | 815   | 1657  | 1305  | 70.98288 | 59.43437 | 123.3793 | 109.3687 |
| ENSMUSGI | 10939.97 | 10915.09 | 17963.92 | 13470.65 | -0.47776 | 0.000567 | 0.008733 | Fam107a  | chr14 | - | 8296274  | 8318023  | 3333 | protein_co family_wit  | 12098 | 11281 | 17641 | 12169 | 141.1242 | 140.1976 | 223.8494 | 173.8002 |
| ENSMUSGI | 1707.28  | 1544.233 | 2588.532 | 2205.073 | -0.50933 | 0.000267 | 0.005275 | Ndufs4   | chr13 | - | 1.14E+08 | 1.14E+08 | 1534 | protein_co NADH_def    | 1888  | 1596  | 2542  | 1992  | 47.85197 | 43.09589 | 70.08389 | 61.81512 |
| ENSMUSGI | 2621.506 | 3499.68  | 4825.748 | 3871.055 | -0.44919 | 0.003675 | 0.032072 | Fam213a  | chr14 | - | 40993740 | 41013788 | 1567 | protein_co family_wit  | 2899  | 3617  | 4739  | 3497  | 71.92873 | 95.61101 | 127.9045 | 106.2325 |
| ENSMUSGI | 1679.247 | 1544.233 | 2361.45  | 2113.195 | -0.43319 | 0.00138  | 0.016346 | Spcl1    | chr14 | - | 30999826 | 31001672 | 1241 | protein_co signal_pep  | 1857  | 1596  | 2319  | 1909  | 58.1786  | 53.27083 | 79.03091 | 73.25292 |
| ENSMUSGI | 1562.595 | 1470.698 | 2300.352 | 1872.984 | -0.41569 | 0.003959 | 0.03374  | Esd      | chr14 | + | 74732297 | 74750765 | 1988 | protein_co esterase_C  | 1728  | 1520  | 2259  | 1692  | 33.79485 | 31.67055 | 48.05824 | 40.51489 |
| ENSMUSGI | 1020.027 | 1018.845 | 1600.776 | 1394.775 | -0.50128 | 0.00051  | 0.008241 | Cln10    | chr14 | + | 1.19E+08 | 1.19E+08 | 1218 | protein_co claudin_1C  | 1128  | 1053  | 1572  | 1260  | 20.60918 | 20.49676 | 31.24273 | 28.18575 |
| ENSMUSGI | 1357.324 | 1382.649 | 2045.775 | 1875.198 | -0.47419 | 0.000419 | 0.007146 | Psmb5    | chr14 | - | 54614120 | 54617995 | 871  | protein_coproteasom    | 1501  | 1429  | 2009  | 1694  | 67.00168 | 67.95829 | 97.55057 | 92.58187 |
| ENSMUSGI | 4931.036 | 4900.713 | 6253.412 | 6657.285 | -0.36925 | 0.001455 | 0.016959 | Sub1     | chr15 | - | 11981339 | 11996983 | 3372 | protein_co SUB1_horr   | 5453  | 5065  | 6141  | 6014  | 62.874   | 62.2186  | 77.02285 | 84.89978 |
| ENSMUSGI | 4805.341 | 4921.032 | 6616.947 | 5941.079 | -0.3448  | 0.00403  | 0.034217 | Eif3h    | chr15 | - | 51786558 | 51865481 | 1253 | protein_co eukaryotic  | 5314  | 5086  | 6498  | 5367  | 164.8897 | 168.1333 | 219.3293 | 203.8972 |
| ENSMUSGI | 762.3076 | 746.9597 | 1176.143 | 1002.91  | -0.47014 | 0.002297 | 0.023073 | Hrsp12   | chr15 | - | 34484021 | 34495255 | 2986 | protein_co heat-respc  | 843   | 772   | 1155  | 906   | 10.97643 | 10.70917 | 16.35913 | 14.44339 |
| ENSMUSGI | 4774.596 | 4802.989 | 9032.367 | 6745.842 | -0.65276 | 4.22E-06 | 0.00027  | Ndufb9   | chr15 | + | 58933810 | 58939489 | 651  | protein_co NADH_def    | 5280  | 4964  | 6870  | 6094  | 315.3379 | 315.8487 | 576.2496 | 445.6072 |
| ENSMUSGI | 988.3775 | 1060.451 | 1714.826 | 1273.009 | -0.47658 | 0.003091 | 0.028496 | Mrlp13   | chr15 | - | 55534094 | 55557748 | 6008 | protein_co mitochond   | 1093  | 1096  | 1684  | 1150  | 7.073159 | 7.556297 | 11.85442 | 9.111684 |
| ENSMUSGI | 1090.561 | 1105.926 | 1677.149 | 1360.459 | -0.41847 | 0.005229 | 0.040997 | Cby1     | chr15 | + | 79659227 | 79667660 | 1119 | protein_co chibby_ho   | 1206  | 1143  | 1647  | 1229  | 41.90254 | 42.31015 | 62.24888 | 52.28204 |
| ENSMUSGI | 1490.253 | 1290.731 | 2098.727 | 2052.312 | -0.52692 | 0.000132 | 0.003159 | Ndufa6   | chr15 | - | 82350139 | 82354291 | 560  | protein_co NADH_def    | 1648  | 1334  | 2061  | 1854  | 114.4175 | 98.67251 | 155.6532 | 157.5986 |
| ENSMUSGI | 2053.619 | 2000.923 | 3450.018 | 2635.683 | -0.52725 | 0.000313 | 0.002793 | Smtd1    | chr15 | + | 82338959 | 82349091 | 705  | protein_co single-pass | 2271  | 2068  | 3368  | 2381  | 125.2423 | 121.5038 | 203.3461 | 167.7685 |
| ENSMUSGI | 8275.966 | 9981.394 | 16822.4  | 11326.46 | -0.54829 | 0.000585 | 0.008953 | Arc      | chr15 | - | 74669083 | 74672570 | 3055 | protein_co activity_re | 9152  | 10316 | 16520 | 10232 | 116.4737 | 139.8713 | 228.7004 | 159.4337 |
| ENSMUSGI | 1098.7   | 935.6347 | 1591.611 | 1264.154 | -0.43021 | 0.006724 | 0.048516 | Zcbr1    | chr15 | - | 93386097 | 93398334 | 1744 | protein_co zinc_finger | 1215  | 967   | 1563  | 1142  | 27.08651 | 22.96722 | 37.90361 | 31.17097 |
| ENSMUSGI | 908.8009 | 1054.645 | 1576.336 | 1347.176 | -0.51191 | 0.000754 | 0.010687 | Fopnl    | chr16 | - | 14299244 | 14317375 | 1465 | protein_co Fgfr1op_N   | 1005  | 1090  | 1548  | 1217  | 26.67176 | 30.81891 | 44.68907 | 39.54428 |
| ENSMUSGI | 418.6814 | 378.3177 | 683.2828 | 585.5842 | -0.56862 | 0.001157 | 0.014392 | Sdf2l1   | chr16 | - | 17130138 | 17132383 | 1108 | protein_co stromal_ce  | 463   | 391   | 671   | 529   | 16.24667 | 14.61724 | 25.61243 | 22.72724 |
| ENSMUSGI | 1003.75  | 1026.586 | 1798.327 | 1384.813 | -0.57405 | 0.000226 | 0.004648 | Ndufb4   | chr16 | - | 37647170 | 37654453 | 971  | protein_co NADH_def    | 1110  | 1061  | 1766  | 1251  | 44.44541 | 45.26104 | 76.92004 | 61.32941 |
| ENSMUSGI | 18694.1  | 18500.8  | 24475.98 | 22103.87 | -0.30594 | 0.006958 | 0.049407 | Eif4a2   | chr16 | + | 23107444 | 23114136 | 2708 | protein_co eukaryotic  | 20673 | 19121 | 24036 | 19968 | 296.8097 | 292.4761 | 375.389  | 351.0077 |
| ENSMUSGI | 2366.499 | 2403.43  | 3550.83  | 3194.7   | -0.46374 | 0.000243 | 0.004895 | Atp5j    | chr16 | - | 84827866 | 84835625 | 927  | protein_co ATP_synth   | 2617  | 2484  | 3487  | 2886  | 109.7608 | 110.9942 | 159.089  | 148.1997 |
| ENSMUSGI | 418.6814 | 443.1445 | 832.9737 | 547.9475 | -0.55101 | 0.003962 | 0.03374  | Cbr3     | chr16 | + | 93683215 | 93690990 | 1170 | protein_co carbonyl_r  | 463   | 458   | 818   | 495   | 15.38574 | 16.21467 | 29.56892 | 20.13956 |
| ENSMUSGI | 3108.009 | 3449.367 | 5303.334 | 4430.072 | -0.52328 | 8.91E-05 | 0.002454 | Atp5o    | chr16 | - | 91684398 | 91931687 | 932  | protein_co ATP_synth   | 3437  | 3565  | 5208  | 4002  | 143.3794 | 158.4426 | 236.3323 | 204.4052 |
| ENSMUSGI | 4305.275 | 4428.542 | 6275.815 | 5884.624 | -0.44808 | 0.000131 | 0.003158 | Sod1     | chr16 | + | 90220742 | 90226322 | 646  | protein_co superoxide  | 4761  | 4577  | 6163  | 5316  | 286.5424 | 293.4788 | 403.4853 | 391.7267 |
| ENSMUSGI | 1509.242 | 1061.418 | 2292.205 | 1742.362 | -0.55414 | 0.001333 | 0.01608  | Cox14    | chr15 | + | 99725618 | 99728136 | 723  | protein_co cytochrom   | 1669  | 1097  | 2251  | 1574  | 89.7514  | 62.84876 | 131.6756 | 105.6328 |
| ENSMUSGI | 1253.331 |          |          |          |          |          |          |          |       |   |          |          |      |                        |       |       |       |       |          |          |          |          |

|          |          |          |          |          |          |          |          |           |      |   |          |          |      |                         |       |       |       |       |          |          |          |          |
|----------|----------|----------|----------|----------|----------|----------|----------|-----------|------|---|----------|----------|------|-------------------------|-------|-------|-------|-------|----------|----------|----------|----------|
| ENSMUSGI | 831.0329 | 794.3703 | 1209.747 | 1033.905 | -0.41355 | 0.006878 | 0.04921  | Pdrg1     | chr2 | - | 1.53E+08 | 1.53E+08 | 1299 | protein_cop53_and_f     | 919   | 821   | 1188  | 934   | 27.50613 | 26.17956 | 38.67901 | 34.22697 |
| ENSMUSGI | 1705.418 | 1673.886 | 2507.067 | 2432.001 | -0.50291 | 8.14E-05 | 0.002742 | Fabp5     | chr3 | + | 10012548 | 10016607 | 3238 | protein_cofatty_acid    | 1897  | 1730  | 2462  | 2197  | 22.7779  | 22.13083 | 32.15727 | 32.29862 |
| ENSMUSGI | 6200.645 | 5239.361 | 8877.585 | 6798.976 | -0.40998 | 0.004624 | 0.032821 | Car2      | chr3 | + | 14886426 | 14900769 | 1789 | protein_cocarbonic_a    | 6857  | 5415  | 8718  | 6142  | 149.0208 | 125.3766 | 206.0984 | 163.4294 |
| ENSMUSGI | 2562.728 | 2534.051 | 4311.504 | 3458.157 | -0.55527 | 5.34E-05 | 0.001698 | PsmA7     | chr2 | - | 1.8E+08  | 1.8E+08  | 1515 | protein_coproteasom     | 2834  | 2619  | 4234  | 3124  | 72.72946 | 71.6063  | 118.1969 | 98.15877 |
| ENSMUSGI | 673.6882 | 787.5974 | 1306.486 | 904.39   | -0.50371 | 0.00453  | 0.036912 | Nkain1    | chr2 | - | 1.81E+08 | 1.81E+08 | 950  | protein_coNa+/K+_tr     | 745   | 814   | 1283  | 817   | 30.48989 | 35.49189 | 57.11775 | 40.93824 |
| ENSMUSGI | 14899.81 | 12165.19 | 19668.57 | 17078.25 | -0.40568 | 0.002184 | 0.023236 | Tmn3      | chr2 | - | 1.81E+08 | 1.81E+08 | 1136 | protein_costathmin-li   | 16477 | 12573 | 19315 | 15428 | 563.9271 | 458.4468 | 719.0919 | 646.4903 |
| ENSMUSGI | 5488.977 | 5223.88  | 7478.434 | 7065.755 | -0.41443 | 0.000355 | 0.006353 | Map11c3a  | chr2 | + | 1.55E+08 | 1.55E+08 | 1112 | protein_comicrotubu     | 6070  | 5399  | 7344  | 6383  | 212.2301 | 201.1115 | 279.3161 | 273.2441 |
| ENSMUSGI | 507.3008 | 507.9713 | 701.6123 | 789.2657 | -0.48155 | 0.00334  | 0.030143 | 1110008F1 | chr2 | + | 1.57E+08 | 1.57E+08 | 2004 | protein_coRIKEN_cDN     | 561   | 525   | 689   | 713   | 10.88399 | 10.8515  | 14.54084 | 16.93646 |
| ENSMUSGI | 1572.542 | 1701.946 | 2501.976 | 2020.21  | -0.42052 | 0.00363  | 0.031824 | Ndufb5    | chr3 | + | 32736990 | 32751566 | 1079 | protein_coNADH_def      | 1739  | 1759  | 2457  | 1825  | 62.66158 | 67.52627 | 96.30564 | 80.51414 |
| ENSMUSGI | 1115.881 | 1090.445 | 1740.284 | 1481.119 | -0.49282 | 0.000655 | 0.009767 | Pdcd10    | chr3 | - | 75516490 | 75556856 | 1927 | protein_coprogramm      | 1234  | 1127  | 1709  | 1338  | 24.89755 | 24.22538 | 37.50839 | 33.05256 |
| ENSMUSGI | 1329.291 | 1371.039 | 1886.92  | 1689.228 | -0.37011 | 0.007066 | 0.049899 | 4933434E  | chr3 | + | 90051636 | 90068347 | 3097 | protein_coRIKEN_cDN     | 1470  | 1417  | 1853  | 1526  | 18.45437 | 18.95209 | 25.30476 | 23.45546 |
| ENSMUSGI | 1062.528 | 1128.18  | 1622.16  | 1382.599 | -0.41046 | 0.005001 | 0.039597 | Hlx1      | chr3 | - | 89995457 | 89998686 | 1117 | protein_coHCLS1_ass     | 1175  | 1166  | 1593  | 1249  | 40.89855 | 43.23881 | 60.31574 | 53.22798 |
| ENSMUSGI | 839.1714 | 937.5699 | 1292.229 | 1214.34  | -0.44604 | 0.002486 | 0.02428  | Lamtor2   | chr3 | - | 88549819 | 88553074 | 668  | protein_colate_endos    | 928   | 969   | 1269  | 1097  | 54.01255 | 60.08633 | 80.34395 | 78.17374 |
| ENSMUSGI | 8867.365 | 8468.123 | 12965.06 | 10461.92 | -0.401   | 0.00201  | 0.020919 | Rps3a1    | chr3 | - | 86137940 | 86142702 | 977  | protein_coribosomal     | 9806  | 8752  | 12732 | 9451  | 390.2299 | 371.0574 | 551.1504 | 460.4833 |
| ENSMUSGI | 1357.324 | 1296.536 | 1769.814 | 1747.897 | -0.37289 | 0.005404 | 0.041795 | F3        | chr3 | + | 1.22E+08 | 1.22E+08 | 1876 | protein_coaogalatio     | 1501  | 1340  | 1738  | 1579  | 31.10792 | 29.58696 | 39.18185 | 40.06637 |
| ENSMUSGI | 3345.834 | 3444.529 | 5371.56  | 4396.863 | -0.48234 | 0.000279 | 0.005433 | Rps20     | chr4 | - | 3831334  | 3835665  | 3706 | protein_coribosomal     | 3700  | 3560  | 5275  | 3972  | 38.81678 | 39.78991 | 60.19842 | 51.01931 |
| ENSMUSGI | 2174.792 | 1892.556 | 3007.055 | 2724.24  | -0.45341 | 0.000761 | 0.010753 | Chmp5     | chr4 | + | 40948407 | 40965303 | 1519 | protein_cocharged_r     | 2405  | 1956  | 2953  | 2461  | 61.55743 | 53.33833 | 82.21929 | 77.12311 |
| ENSMUSGI | 1819.41  | 1695.173 | 2813.577 | 2242.71  | -0.47375 | 0.001031 | 0.013173 | Enho      | chr4 | - | 41638144 | 41640324 | 1269 | protein_coenergy_ho     | 2012  | 1752  | 2763  | 2026  | 61.64382 | 57.18747 | 96.09866 | 75.99911 |
| ENSMUSGI | 2297.774 | 2034.788 | 3269.778 | 2886.964 | -0.46496 | 0.000529 | 0.008357 | Dctn3     | chr4 | - | 41714798 | 41723170 | 973  | protein_co dyactin_3    | 2541  | 2103  | 3211  | 2608  | 101.5348 | 89.52716 | 139.5711 | 127.5926 |
| ENSMUSGI | 555.2276 | 755.6678 | 1094.678 | 893.3204 | -0.50803 | 0.003971 | 0.033769 | Ccdc107   | chr4 | + | 44492900 | 43495921 | 942  | protein_co coiled-coil  | 614   | 781   | 1075  | 807   | 25.34199 | 34.34223 | 48.26425 | 40.78058 |
| ENSMUSGI | 1062.528 | 1296.536 | 1769.814 | 1747.897 | -0.37289 | 0.005404 | 0.041795 | F3        | chr4 | + | 44004452 | 44032846 | 1710 | protein_co clathrin_lig | 6268  | 5900  | 7129  | 6516  | 142.5135 | 142.9171 | 176.3196 | 161.391  |
| ENSMUSGI | 5780.155 | 6435.271 | 10085.29 | 7890.443 | -0.50855 | 0.000222 | 0.004591 | Rps6      | chr4 | - | 86854660 | 86857412 | 1128 | protein_co ribosomal    | 6392  | 6651  | 9904  | 7128  | 220.3184 | 244.2341 | 371.3381 | 300.8079 |
| ENSMUSGI | 2342.084 | 2426.651 | 3961.207 | 3203.555 | -0.53612 | 9.68E-05 | 0.00259  | Ndufs5    | chr4 | - | 1.24E+08 | 1.24E+08 | 680  | protein_coNADH_def      | 2590  | 2508  | 3890  | 2894  | 148.086  | 152.7731 | 241.9406 | 202.5911 |
| ENSMUSGI | 381.606  | 315.426  | 590.617  | 482.6365 | -0.51114 | 0.006166 | 0.045573 | Hmgcl     | chr4 | + | 1.36E+08 | 1.36E+08 | 1418 | protein_co3-hydroxy-    | 422   | 326   | 580   | 436   | 11.57069 | 9.522911 | 17.28995 | 14.63663 |
| ENSMUSGI | 3713.876 | 3818.977 | 6010.037 | 4831.9   | -0.48199 | 0.000326 | 0.005953 | Prdx1     | chr4 | + | 1.17E+08 | 1.17E+08 | 2294 | protein_co peroxidredc  | 4107  | 3947  | 5902  | 4365  | 69.60725 | 71.26923 | 108.8113 | 90.57775 |
| ENSMUSGI | 8391.714 | 8253.324 | 11126    | 10466.35 | -0.35409 | 0.001687 | 0.018544 | Akr1a1    | chr4 | - | 1.17E+08 | 1.17E+08 | 2227 | protein_coaldo-keto-    | 9280  | 8530  | 10926 | 9455  | 162.0134 | 158.6653 | 207.4995 | 202.1027 |
| ENSMUSGI | 273.734  | 2267.003 | 3235.156 | 2838.257 | -0.35813 | 0.005954 | 0.043557 | Cmpk1     | chr4 | - | 1.15E+08 | 1.15E+08 | 3170 | protein_co cytidine_r   | 2625  | 2343  | 3177  | 2564  | 32.19536 | 30.6155  | 42.38635 | 38.50255 |
| ENSMUSGI | 727.0407 | 752.7651 | 1063.111 | 995.1611 | -0.42544 | 0.004638 | 0.037468 | Mrt04     | chr4 | - | 1.39E+08 | 1.39E+08 | 1221 | protein_coMRT4_mR       | 804   | 778   | 1044  | 899   | 25.60319 | 26.39322 | 36.16204 | 35.04893 |
| ENSMUSGI | 2317.668 | 2530.181 | 3718.851 | 3112.784 | -0.45309 | 0.000839 | 0.011496 | Eif3i     | chr4 | - | 1.3E+08  | 1.3E+08  | 2323 | protein_co eukaryotic   | 2563  | 2615  | 3652  | 2812  | 42.89657 | 46.62844 | 66.48897 | 57.62313 |
| ENSMUSGI | 1877.284 | 1756.129 | 2562.056 | 2322.412 | -0.39287 | 0.002893 | 0.027031 | Rpl22     | chr4 | + | 1.52E+08 | 1.52E+08 | 2051 | protein_co ribosomal    | 2076  | 1815  | 2516  | 2098  | 39.35364 | 36.65552 | 51.88156 | 48.69345 |
| ENSMUSGI | 2660.39  | 2245.717 | 3562.032 | 3035.297 | -0.38842 | 0.005532 | 0.042277 | Park7     | chr4 | - | 1.51E+08 | 1.51E+08 | 937  | protein_co Parkinson    | 2942  | 2321  | 3498  | 2742  | 122.0749 | 102.6039 | 157.8877 | 139.3024 |
| ENSMUSGI | 632.0914 | 475.0741 | 1022.378 | 760.4846 | -0.56906 | 0.001947 | 0.020455 | Slc25a33  | chr4 | - | 1.5E+08  | 1.5E+08  | 1887 | protein_co solute_car   | 699   | 491   | 1004  | 687   | 14.40219 | 10.77799 | 22.50245 | 17.33068 |
| ENSMUSGI | 805.713  | 635.6898 | 1519.311 | 1342.748 | -0.86756 | 5.72E-08 | 9.56E-06 | Tom7      | chr4 | - | 23838944 | 23844161 | 1125 | protein_co translocasi  | 891   | 657   | 1492  | 1213  | 30.79274 | 24.1903  | 56.08986 | 51.32619 |
| ENSMUSGI | 1823.027 | 1784.189 | 2774.882 | 2371.118 | -0.46952 | 0.000516 | 0.008307 | Fam213b   | chr5 | - | 1.55E+08 | 1.55E+08 | 883  | protein_co family_wit   | 2016  | 1844  | 2725  | 2142  | 88.7673  | 86.50249 | 130.519  | 115.4754 |
| ENSMUSGI | 1101.412 | 1235.58  | 2057.995 | 1536.467 | -0.54598 | 0.0006   | 0.009135 | Mrlp20    | chr5 | + | 1.56E+08 | 1.56E+08 | 810  | protein_co mitochond    | 1218  | 1277  | 2021  | 1388  | 58.46359 | 65.30317 | 105.5235 | 81.57088 |
| ENSMUSGI | 537.142  | 534.0955 | 1231.131 | 711.7782 | -0.68482 | 0.00047  | 0.007725 | Mrlp33    | chr5 | + | 31596935 | 31701972 | 2741 | protein_co mitochond    | 594   | 552   | 1209  | 643   | 8.425595 | 8.341774 | 18.65457 | 11.1669  |
| ENSMUSGI | 1140.296 | 1046.905 | 1672.057 | 1427.984 | -0.45251 | 0.002031 | 0.021073 | Grpel1    | chr5 | + | 36464998 | 36474080 | 3528 | protein_co GrPe-like_   | 1261  | 1082  | 1642  | 1290  | 13.89663 | 12.70361 | 19.68397 | 17.40571 |
| ENSMUSGI | 1212.638 | 1306.018 | 15882.51 | 17014.05 | -0.3629  | 0.001485 | 0.017148 | Uchl1     | chr5 | + | 66676098 | 66687231 | 1167 | protein_co ubiquitin_c  | 13407 | 13498 | 15597 | 15370 | 446.6671 | 479.1008 | 565.247  | 626.9512 |
| ENSMUSGI | 2911.78  | 2657.899 | 4208.656 | 3696.155 | -0.46644 | 0.000316 | 0.005834 | Vps29     | chr5 | + | 1.22E+08 | 1.22E+08 | 2716 | protein_co vacuolar_f   | 3220  | 2747  | 4133  | 3339  | 46.09452 | 41.89452 | 64.35817 | 58.52176 |
| ENSMUSGI | 7990.214 | 8233.973 | 11346.98 | 9672.656 | -0.34818 | 0.004542 | 0.036925 | Rpl6      | chr5 | + | 1.21E+08 | 1.21E+08 | 1270 | protein_co ribosomal    | 8836  | 8510  | 11143 | 8738  | 270.5049 | 277.5583 | 371.0791 | 327.5209 |
| ENSMUSGI | 1334.717 | 1215.261 | 1653.728 | 1762.288 | -0.38421 | 0.005479 | 0.04207  | Erp29     | chr5 | - | 1.21E+08 | 1.21E+08 | 5204 | protein_co endoplasm    | 1476  | 1256  | 1624  | 1592  | 11.02738 | 9.997254 | 13.19826 | 14.56252 |
| ENSMUSGI | 5017.847 | 4761.384 | 7986.568 | 6714.847 | -0.54483 | 1.85E-05 | 0.00081  | Ndufa9    | chr5 | - | 11900373 | 11907446 | 492  | protein_co NADH_def     | 5549  | 4921  | 7843  | 6066  | 438.5032 | 414.3016 | 674.1944 | 586.9053 |
| ENSMUSGI | 1205.405 | 1262.682 | 1605.867 | 1595.136 | -0.37585 | 0.005561 | 0.042407 | Pml1d     | chr5 | + | 1.47E+08 | 1.47E+08 | 1196 | protein_co polymeras    | 1333  | 1243  | 1577  | 1441  | 43.33334 | 43.04952 | 55.76588 | 57.35397 |
| ENSMUSGI | 2470.492 | 2395.689 | 3577.306 | 3100.608 | -0.4214  | 0.001192 | 0.014697 | Pomp      | chr5 | + | 1.48E+08 | 1.48E+08 | 734  | protein_coproteasom     | 2732  | 2476  | 3513  | 2801  | 144.7131 | 139.7278 | 202.4185 | 181.6552 |
| ENSMUSGI | 1654.832 | 1106.894 | 2340.065 | 1899.551 | -0.52695 | 0.002271 | 0.022867 | Npy       | chr6 | + | 49822710 | 49829507 | 566  | protein_co neurocept    | 1830  | 1144  | 2298  | 1716  | 125.7065 | 83.72169 | 171.7124 | 144.3217 |
| ENSMUSGI | 972.1005 | 970.467  | 1653.728 | 1182.238 | -0.47354 | 0.004194 | 0.035203 | Fam333    | chr6 | - | 39801804 | 39810988 | 1107 | protein_co mitochond    | 1075  | 1003  | 1624  | 1068  | 37.75583 | 37.53027 | 62.04495 | 45.92555 |
| ENSMUSGI | 1697.333 | 1793.864 | 2772.845 | 2285.882 | -0.48653 | 0.000515 | 0.008307 | Chchd6    | chr6 | - | 89383146 | 89595652 | 1126 | protein_co coiled-coil  | 1877  | 1854  | 2723  | 2065  | 64.81105 | 68.20241 | 102.2768 | 87.29963 |
| ENSMUSGI | 2116.918 | 2278.614 | 3135.362 | 2961.13  | -0.43765 | 0.000546 | 0.008459 | Camk1     | chr6 | - | 1.13E+08 | 1.13E+08 | 4744 | protein_co calcium/ca   | 2341  | 2355  | 3079  | 2675  | 19.1858  | 20.56244 | 27.44941 | 26.84169 |
| ENSMUSGI | 217.9314 | 253.5019 | 481.6584 | 335.4103 | -0.6102  | 0.0      |          |           |      |   |          |          |      |                         |       |       |       |       |          |          |          |          |

|          |          |          |          |          |          |          |          |          |        |   |          |          |      |                        |       |       |       |       |          |          |          |          |
|----------|----------|----------|----------|----------|----------|----------|----------|----------|--------|---|----------|----------|------|------------------------|-------|-------|-------|-------|----------|----------|----------|----------|
| ENSMUSGI | 3812.442 | 2961.714 | 5527.361 | 4147.796 | -0.45411 | 0.003697 | 0.032102 | Rnf13    | chr3   | + | 57736066 | 57835233 | 2676 | protein_co ring_finger | 4216  | 3061  | 5428  | 3747  | 61.25445 | 47.38115 | 85.78705 | 66.65432 |
| ENSMUSGI | 3437.166 | 3037.185 | 5073.197 | 3773.642 | -0.4035  | 0.006704 | 0.048474 | Cuedc2   | chr19  | - | 46329812 | 46338660 | 1941 | protein_co CUE_dome    | 3801  | 3139  | 4982  | 3409  | 76.13696 | 66.98756 | 108.5541 | 83.60499 |
| ENSMUSGI | 4182.293 | 3930.246 | 6926.512 | 5579.101 | -0.57285 | 1.91E-05 | 0.008821 | Cox6b1   | chr7   | - | 30616974 | 30626151 | 505  | protein_co cytochrom   | 4625  | 4602  | 6802  | 5040  | 356.0767 | 333.1785 | 569.6568 | 475.0834 |
| ENSMUSGI | 234.2084 | 273.8207 | 437.8712 | 375.261  | -0.54421 | 0.005098 | 0.040211 | Rps27l   | chr9   | + | 66946086 | 66949516 | 575  | protein_co ribosomal   | 259   | 283   | 430   | 339   | 17.51278 | 20.3867  | 31.62777 | 28.06484 |
| ENSMUSGI | 977.5261 | 1073.996 | 1797.309 | 1560.82  | -0.64096 | 1.03E-05 | 0.000527 | Mrpl41   | chr2   | - | 24974117 | 24975098 | 776  | protein_co mitochond   | 1081  | 1110  | 1765  | 1410  | 54.16106 | 59.25017 | 96.19467 | 86.49442 |
| ENSMUSGI | 350.8604 | 283.4964 | 499.9879 | 555.6962 | -0.60427 | 0.001129 | 0.014127 | Mrpl55   | chr11  | + | 59202486 | 59206134 | 940  | protein_co seleno      | 388   | 293   | 491   | 502   | 16.04823 | 12.91125 | 22.09132 | 25.42182 |
| ENSMUSGI | 1758.824 | 1650.665 | 2493.83  | 2361.155 | -0.47057 | 0.000291 | 0.005586 | C1qa     | chr4   | - | 1.37E+08 | 1.37E+08 | 1040 | protein_co compleme    | 1945  | 1706  | 2449  | 2133  | 72.71256 | 67.94759 | 99.59178 | 97.63111 |
| ENSMUSGI | 2616.985 | 2591.137 | 3733.107 | 3273.294 | -0.39612 | 0.001947 | 0.020455 | Paip2    | chr18  | + | 35598617 | 35617186 | 1521 | protein_co polyadeny   | 2894  | 2678  | 3666  | 2957  | 73.97628 | 72.93059 | 101.9369 | 92.54497 |
| ENSMUSGI | 4679.646 | 5027.464 | 8152.552 | 5866.912 | -0.47553 | 0.001344 | 0.016118 | 15-Sep   | chr3   | + | 1.45E+08 | 1.45E+08 | 1514 | protein_co seleno      | 5175  | 5196  | 8006  | 5300  | 132.8947 | 142.1581 | 223.6443 | 166.6406 |
| ENSMUSGI | 21598.72 | 22262.69 | 31320.01 | 26215.13 | -0.365   | 0.002845 | 0.026681 | Psd      | chr19  | - | 46312087 | 46327156 | 3903 | protein_co cpleckstrin | 23885 | 23009 | 30757 | 23682 | 237.9304 | 244.1898 | 333.2832 | 288.8355 |
| ENSMUSGI | 776.7761 | 778.8893 | 1136.429 | 1084.825 | -0.46154 | 0.001729 | 0.018928 | Ndufc1   | chr3   | - | 51404677 | 51408988 | 1249 | protein_co NADH_def    | 859   | 805   | 1116  | 980   | 26.73954 | 26.69696 | 37.78938 | 37.35032 |
| ENSMUSGI | 438.5756 | 421.8581 | 766.7838 | 663.0718 | -0.62972 | 0.0002   | 0.004257 | Lsm1     | chr8   | + | 25785591 | 25803975 | 2360 | protein_co LSM1_hon    | 485   | 436   | 753   | 599   | 7.990113 | 7.652492 | 13.49432 | 12.08219 |
| ENSMUSGI | 882.5768 | 960.7914 | 1379.804 | 1273.009 | -0.47336 | 0.001142 | 0.014256 | Sf3b6    | chr12  | + | 4817608  | 4827658  | 1115 | protein_co splicing_fa | 976   | 993   | 1355  | 1150  | 34.03283 | 36.8895  | 51.39637 | 49.09686 |
| ENSMUSGI | 1520.094 | 1535.525 | 2170.008 | 1965.969 | -0.40113 | 0.00266  | 0.025523 | Nenf     | chr1   | - | 1.91E+08 | 1.91E+08 | 742  | protein_co neuron_de   | 1681  | 1587  | 2131  | 1776  | 88.08196 | 88.59341 | 121.464  | 113.9383 |
| ENSMUSGI | 3564.67  | 3747.377 | 7010.013 | 5250.333 | -0.67402 | 2.66E-06 | 0.000184 | Rps16    | chr7   | + | 28350652 | 28352696 | 650  | protein_co ribosomal   | 3942  | 3873  | 6884  | 4743  | 235.7906 | 246.8099 | 447.9149 | 347.3525 |
| ENSMUSGI | 1369.079 | 1404.903 | 2010.135 | 1814.315 | -0.42413 | 0.001775 | 0.019229 | Mrps26   | chr2   | + | 1.31E+08 | 1.31E+08 | 4278 | protein_co mitochond   | 1514  | 1452  | 1974  | 1639  | 13.75968 | 14.05899 | 19.51526 | 18.23765 |
| ENSMUSGI | 6182.54  | 74102.85 | 98441.6  | 84000.9  | -0.34397 | 0.00483  | 0.038692 | Eef1a1   | chr9   | - | 78478449 | 78489151 | 1794 | protein_co eukaryotic  | 74294 | 76587 | 96672 | 75884 | 1610.106 | 1768.321 | 2279.01  | 2013.532 |
| ENSMUSGI | 674.0058 | 673.4248 | 1022.378 | 904.39   | -0.51273 | 0.001153 | 0.014355 | Mrpl23   | chr7   | + | 1.43E+08 | 1.43E+08 | 712  | protein_co ribosom     | 679   | 696   | 1004  | 817   | 37.07771 | 40.49092 | 59.63782 | 54.62265 |
| ENSMUSGI | 3845.901 | 4528.201 | 6650.551 | 5720.793 | -0.51702 | 0.000108 | 0.002812 | Rpl10a   | chr17  | + | 28328471 | 28331032 | 1618 | protein_co ribosomal   | 4253  | 4680  | 6531  | 5168  | 102.1974 | 119.8107 | 170.714  | 152.0459 |
| ENSMUSGI | 2660.39  | 2327.96  | 3781.986 | 3120.533 | -0.4261  | 0.002304 | 0.023099 | H2afz    | chr3   | + | 1.38E+08 | 1.38E+08 | 1069 | protein_co H2A_histo   | 2942  | 2406  | 3714  | 2819  | 107.0011 | 93.22798 | 146.9374 | 125.5302 |
| ENSMUSGI | 444.9055 | 620.2088 | 856.3947 | 797.0145 | -0.53403 | 0.002711 | 0.004585 | 1110032A | chr9   | - | 50762828 | 50775520 | 2761 | protein_co RIKEN_cD    | 492   | 641   | 841   | 720   | 6.928223 | 6.616566 | 12.88242 | 12.41357 |
| ENSMUSGI | 259.5282 | 269.9505 | 420.5601 | 433.9301 | -0.56663 | 0.002405 | 0.023789 | Smim3    | chr18  | - | 60474193 | 60501983 | 1984 | protein_co small_inte  | 287   | 279   | 413   | 392   | 5.624234 | 5.824933 | 8.803927 | 9.405353 |
| ENSMUSGI | 5671.971 | 5627.354 | 7938.053 | 7624.772 | -0.56727 | 2.57E-05 | 0.040201 | Fau      | chr19  | + | 6057888  | 6059524  | 736  | protein_co Finkel-Bisk | 6279  | 5816  | 9563  | 6888  | 331.6926 | 327.3218 | 549.5211 | 475.4983 |
| ENSMUSGI | 1699.907 | 1632.281 | 2303.406 | 2072.238 | -0.36432 | 0.006197 | 0.057079 | Higd1a   | chr9   | - | 1.22E+08 | 1.22E+08 | 1873 | protein_co HIG1_dom    | 1871  | 1687  | 2262  | 1872  | 38.83821 | 37.30832 | 51.0767  | 47.57719 |
| ENSMUSGI | 377.9888 | 167.3886 | 521.3723 | 481.5296 | -0.6068  | 0.00693  | 0.049344 | Hdh3     | chr4   | - | 62499008 | 62503467 | 1205 | protein_co haloacid_c  | 418   | 173   | 512   | 435   | 13.48691 | 5.946856 | 17.97012 | 17.18434 |
| ENSMUSGI | 576.9303 | 551.5117 | 836.0286 | 764.9125 | -0.44241 | 0.005721 | 0.043213 | Polr2l   | chr7   | - | 1.41E+08 | 1.41E+08 | 1650 | protein_co polymeras   | 638   | 570   | 821   | 691   | 15.03349 | 14.30933 | 21.04395 | 19.93539 |
| ENSMUSGI | 2493.099 | 2579.527 | 3538.611 | 3068.506 | -0.35204 | 0.006722 | 0.048516 | Fndc4    | chr5   | - | 31292255 | 31295877 | 2757 | protein_co fibronectr  | 2757  | 2666  | 3475  | 2772  | 47.40885 | 48.84138 | 65.00133 | 58.36109 |
| ENSMUSGI | 391.553  | 355.0961 | 557.013  | 542.4126 | -0.47263 | 0.006992 | 0.04958  | Mcd30    | chr15  | + | 52712445 | 52730431 | 871  | protein_co mediator_or | 433   | 367   | 547   | 490   | 19.32827 | 17.45325 | 26.56056 | 26.77988 |
| ENSMUSGI | 3242.746 | 3232.633 | 5582.349 | 4466.602 | -0.58055 | 1.80E-05 | 0.000793 | Atp5j2   | chr5   | - | 1.45E+08 | 1.45E+08 | 955  | protein_co ATP_synth   | 3586  | 3341  | 5482  | 4035  | 145.9923 | 144.911  | 242.7748 | 201.1272 |
| ENSMUSGI | 716.1894 | 657.9438 | 1177.161 | 863.4323 | -0.48842 | 0.004302 | 0.035745 | Josd2    | chr7   | + | 44467980 | 44471652 | 1128 | protein_co Josephin_c  | 792   | 680   | 1156  | 780   | 27.29853 | 24.97055 | 43.34278 | 32.91669 |
| ENSMUSGI | 2597.091 | 2995.579 | 5048.757 | 3889.873 | -0.6089  | 3.11E-05 | 0.001143 | Atp5l    | chr9   | - | 44913250 | 44920742 | 511  | protein_co ATP_synth   | 2872  | 3096  | 4958  | 3514  | 218.5177 | 250.9623 | 410.3493 | 327.3494 |
| ENSMUSGI | 1648.502 | 1669.049 | 2875.694 | 2339.016 | -0.59245 | 2.61E-05 | 0.001033 | Phb      | chr11  | + | 9566957  | 95680773 | 1799 | protein_co prohibitin  | 1823  | 1725  | 2824  | 2113  | 39.39841 | 39.7179  | 66.38983 | 55.91123 |
| ENSMUSGI | 6112.025 | 6051.147 | 10894.85 | 7405.593 | -0.52307 | 0.000675 | 0.009934 | Rpl12    | chr2   | + | 32961559 | 32964496 | 1242 | protein_co ribosomal   | 6759  | 6254  | 10699 | 6690  | 211.5846 | 208.5762 | 364.3255 | 256.4102 |
| ENSMUSGI | 4533.153 | 4564.969 | 9713.614 | 7518.503 | -0.84178 | 7.72E-10 | 4.19E-07 | Rps21    | chr2   | + | 1.8E+08  | 1.8E+08  | 481  | protein_co ribosomal   | 5013  | 4718  | 9539  | 6792  | 405.2059 | 406.2948 | 838.737  | 672.1765 |
| ENSMUSGI | 1405.25  | 1577.13  | 2694.436 | 2030.173 | -0.58902 | 0.000133 | 0.003159 | Timm8b   | chr9   | + | 50603901 | 50605320 | 527  | protein_co translocasi | 1554  | 1630  | 2646  | 1834  | 114.6472 | 128.1166 | 212.3475 | 165.6607 |
| ENSMUSGI | 2452.406 | 2222.495 | 3564.068 | 2934.563 | -0.43304 | 0.001771 | 0.019227 | Atp6v1g1 | chr4   | + | 63544772 | 63550750 | 1135 | protein_co ATPase_H+   | 2712  | 2297  | 3500  | 2651  | 92.90028 | 83.82885 | 130.4188 | 111.1846 |
| ENSMUSGI | 604.0587 | 685.0356 | 1064.129 | 882.2507 | -0.51813 | 0.001509 | 0.01722  | Rlbp1    | chr7   | - | 79374871 | 79387027 | 2202 | protein_co retinaldeh  | 668   | 708   | 1045  | 797   | 11.79458 | 13.31816 | 20.07091 | 17.22946 |
| ENSMUSGI | 3960.744 | 3057.503 | 6203.515 | 4720.097 | -0.56505 | 0.00027  | 0.005313 | 1110008P | chr2   | - | 32377097 | 32381938 | 2618 | protein_co RIKEN_cD    | 4380  | 3160  | 6092  | 4264  | 65.04706 | 49.99722 | 98.41432 | 77.53151 |
| ENSMUSGI | 680.922  | 794.3703 | 1149.667 | 1007.338 | -0.48294 | 0.002235 | 0.022647 | Rpl22l1  | chr3   | + | 28805436 | 28807352 | 489  | protein_co ribosomal   | 753   | 821   | 1129  | 910   | 59.87    | 69.54448 | 97.6457  | 88.58562 |
| ENSMUSGI | 30448    | 26341.94 | 36821.92 | 36040.55 | -0.33717 | 0.004126 | 0.034885 | Pcsk1n   | chrX   | + | 7919822  | 79234410 | 2193 | protein_co proprotein  | 33671 | 27225 | 36160 | 32558 | 596.9536 | 514.2303 | 697.3613 | 706.7239 |
| ENSMUSGI | 396.9787 | 365.7393 | 566.1777 | 562.338  | -0.48041 | 0.005662 | 0.042959 | Mettl22  | chr16  | + | 8470788  | 8490684  | 1825 | protein_co methyltr    | 439   | 378   | 556   | 508   | 9.352438 | 8.579408 | 12.88487 | 13.25048 |
| ENSMUSGI | 620.3357 | 538.9333 | 823.8089 | 841.2931 | -0.45668 | 0.004575 | 0.03711  | Tcta     | chr9   | - | 1.08E+08 | 1.08E+08 | 1628 | protein_co T_cell_leu  | 686   | 557   | 809   | 760   | 16.38298 | 14.17194 | 21.01659 | 22.22335 |
| ENSMUSGI | 458.505  | 5924.397 | 8060.904 | 7164.275 | -0.35857 | 0.002748 | 0.025984 | Ppt2r4   | chr2   | + | 30416039 | 30447806 | 3738 | protein_co protein_pf  | 6357  | 6123  | 7916  | 6472  | 66.12049 | 67.85054 | 89.56421 | 82.41949 |
| ENSMUSGI | 454.8526 | 536.9982 | 803.4428 | 747.2011 | -0.55706 | 0.000862 | 0.011724 | Mrpl12   | chr11  | + | 1.2E+08  | 1.2E+08  | 1316 | protein_co mitochond   | 503   | 555   | 789   | 675   | 14.86056 | 17.4689  | 25.35649 | 24.41623 |
| ENSMUSGI | 290.2737 | 278.6585 | 513.2258 | 440.5719 | -0.61357 | 0.000959 | 0.012581 | Mrps6    | chr16  | + | 92058270 | 92112227 | 846  | protein_co mitochond   | 321   | 288   | 504   | 398   | 14.75224 | 14.10102 | 25.1958  | 22.39461 |
| ENSMUSGI | 2537.408 | 2463.419 | 3679.137 | 3189.165 | -0.42271 | 0.001112 | 0.01395  | Ndufb10  | chr17  | - | 24722060 | 24724478 | 834  | protein_co NADH_def    | 2806  | 2546  | 3610  | 2881  | 130.8112 | 126.4505 | 183.2188 | 164.4402 |
| ENSMUSGI | 6265.753 | 6437.206 | 10760.43 | 7745.431 | -0.48851 | 0.000831 | 0.011458 | Ppp1ca   | chr19  | + | 4192158  | 4195419  | 1379 | protein_co protein_pf  | 6929  | 6653  | 10567 | 6997  | 195.3572 | 199.8396 | 324.0824 | 241.534  |
| ENSMUSGI | 1268.704 | 1334.271 | 2246.381 | 1867.449 | -0.59745 | 3.00E-05 | 0.001132 | Snrpd2   | chr7   | + | 19149722 | 19152735 | 613  | protein_co small_nucl  | 1403  | 1379  | 2206  | 1687  | 88.98573 | 93.18203 | 152.1994 | 131.0042 |
| ENSMUSGI | 3128.807 | 3904.122 | 6422.451 | 4761.055 | -0.93929 | 0.000123 | 0.003024 | Rps19    | chr7</ |   |          |          |      |                        |       |       |       |       |          |          |          |          |

|          |          |          |          |          |          |          |          |          |       |   |          |          |      |                       |       |       |       |       |          |          |          |          |
|----------|----------|----------|----------|----------|----------|----------|----------|----------|-------|---|----------|----------|------|-----------------------|-------|-------|-------|-------|----------|----------|----------|----------|
| ENSMUSGI | 1102.317 | 1177.526 | 1791.199 | 1402.524 | -0.43218 | 0.004889 | 0.038976 | Cryz11   | chr16 | - | 91689322 | 91728975 | 1965 | protein_ccrystallin_i | 1219  | 1217  | 1759  | 1267  | 24.11928 | 25.65408 | 37.85919 | 30.69338 |
| ENSMUSGI | 195.3244 | 312.5233 | 488.7865 | 426.1814 | -0.64655 | 0.001857 | 0.019686 | Rpl23a   | chr11 | - | 78180932 | 78183584 | 588  | protein_ccribosomal   | 216   | 323   | 480   | 385   | 14.28235 | 22.75378 | 34.52486 | 31.16837 |
| ENSMUSGI | 5922.127 | 6741.021 | 10580.19 | 7889.336 | -0.49109 | 0.000702 | 0.0102   | Rpl5     | chr5  | + | 1.08E+08 | 1.08E+08 | 2045 | protein_ccribosomal   | 6549  | 6967  | 10390 | 7127  | 124.5102 | 141.1175 | 214.2772 | 165.8991 |
| ENSMUSGI | 734.275  | 686.0031 | 2908.28  | 3810.172 | -1.9964  | 1.41E-39 | 7.2E-36  | Rpl30    | chr15 | - | 34440505 | 34443640 | 2412 | protein_ccribosomal   | 812   | 709   | 2856  | 3442  | 13.08886 | 12.17579 | 50.07823 | 67.93042 |
| ENSMUSGI | 1428.762 | 1150.434 | 1856.37  | 1776.678 | -0.44357 | 0.002621 | 0.025263 | 28104281 | chr8  | - | 70504292 | 70506752 | 837  | protein_ccRIKEN_cDN   | 1580  | 1189  | 1823  | 1605  | 73.39303 | 58.84164 | 92.11476 | 91.28098 |
| ENSMUSGI | 483.7895 | 369.6096 | 749.4726 | 616.5793 | -0.56221 | 0.002175 | 0.022258 | Cecr5    | chr6  | - | 1.21E+08 | 1.21E+08 | 1928 | protein_cccat_eye_sj  | 535   | 382   | 736   | 557   | 10.78872 | 8.207005 | 16.14503 | 13.75241 |
| ENSMUSGI | 3469.72  | 3777.371 | 6088.447 | 4927.099 | -0.55331 | 4.28E-05 | 0.001484 | Rpl18    | chr7  | + | 45715457 | 45720835 | 2987 | protein_ccribosomal   | 3837  | 3904  | 5979  | 4451  | 49.94359 | 54.13809 | 84.6567  | 70.93378 |
| ENSMUSGI | 137.4505 | 113.205  | 285.1255 | 315.4849 | -0.93405 | 1.13E-05 | 0.000564 | Naa38    | chr11 | + | 69395487 | 69396680 | 671  | protein_ccN(alpha)-a  | 152   | 117   | 280   | 285   | 8.807329 | 7.222569 | 17.64833 | 20.21869 |
| ENSMUSGI | 5406.687 | 5242.264 | 9933.568 | 7226.265 | -0.62037 | 1.95E-05 | 0.000827 | Rpl11    | chr4  | - | 1.36E+08 | 1.36E+08 | 917  | protein_ccribosomal   | 5979  | 5418  | 9755  | 6528  | 253.5026 | 244.7361 | 449.9103 | 338.8766 |
| ENSMUSGI | 2106.067 | 1961.253 | 3000.946 | 2458.568 | -0.38631 | 0.005716 | 0.043204 | Hadhb    | chr5  | + | 30155248 | 30184593 | 4388 | protein_cchydroxyac   | 2329  | 2027  | 2947  | 2221  | 20.63603 | 19.13443 | 28.40413 | 24.09421 |
| ENSMUSGI | 1861.912 | 2203.144 | 4106.825 | 2891.391 | -0.68671 | 1.88E-05 | 0.000817 | Uqcr10   | chr11 | - | 4701973  | 4704342  | 510  | protein_ccubiquitin-l | 2059  | 2277  | 4033  | 2612  | 156.9674 | 184.9359 | 334.4461 | 243.8    |
| ENSMUSGI | 1120.402 | 1126.245 | 1641.508 | 1833.133 | -0.57235 | 3.95E-05 | 0.001402 | H2afj    | chr6  | + | 1.37E+08 | 1.37E+08 | 1827 | protein_ccH2A_histo   | 1239  | 1164  | 1612  | 1656  | 26.36671 | 26.39021 | 37.31595 | 43.14719 |
| ENSMUSGI | 2331.233 | 2243.782 | 3389.938 | 2896.926 | -0.42177 | 0.001448 | 0.016891 | Psm3     | chr12 | + | 70974621 | 70996347 | 2846 | protein_ccproteasom   | 2578  | 2319  | 3329  | 2617  | 35.21853 | 33.75159 | 49.47057 | 43.77232 |
| ENSMUSGI | 11706.8  | 12099.39 | 19249.02 | 14600.86 | -0.46377 | 0.000716 | 0.010336 | Tpt1     | chr14 | + | 75845093 | 75848525 | 1169 | protein_cctumor_prc   | 12946 | 12505 | 18903 | 13190 | 430.5705 | 443.0957 | 683.8868 | 537.1072 |
| ENSMUSGI | 1809.463 | 1654.535 | 3483.622 | 2381.081 | -0.66286 | 4.46E-05 | 0.001531 | Gm10076  | chr14 | + | 1.06E+08 | 1.06E+08 | 384  | protein_ccpredicted_  | 2001  | 1710  | 3421  | 2151  | 202.5998 | 184.4562 | 376.7818 | 266.649  |
| ENSMUSGI | 1341.047 | 1436.833 | 2308.498 | 1792.176 | -0.50197 | 0.000858 | 0.011684 | Pop5     | chr5  | + | 1.15E+08 | 1.15E+08 | 1587 | protein_ccprocessing  | 1483  | 1485  | 2267  | 1619  | 36.33184 | 38.75948 | 60.4147  | 48.56246 |
| ENSMUSGI | 754.1691 | 620.2088 | 1316.669 | 828.0095 | -0.52401 | 0.005471 | 0.04207  | Pou3f3os | chr1  | - | 42590782 | 42694842 | 2085 | lincRNA_POU_dom       | 834   | 641   | 1293  | 748   | 15.55189 | 12.73445 | 26.27722 | 17.07758 |
| ENSMUSGI | 508.2051 | 536.9982 | 770.8571 | 733.9175 | -0.4597  | 0.00444  | 0.036438 | Irak2    | chr6  | + | 1.14E+08 | 1.14E+08 | 319  | protein_ccinterleukin | 562   | 555   | 757   | 663   | 6.873358 | 7.231541 | 10.07102 | 9.927816 |
| ENSMUSGI | 3385.622 | 4284.375 | 7729.955 | 5299.039 | -0.66588 | 4.51E-05 | 0.001536 | Rpl35a   | chr16 | + | 33056453 | 33060189 | 2858 | protein_ccribosomal   | 3744  | 4428  | 7591  | 4787  | 50.93271 | 64.17616 | 112.3323 | 79.73186 |
| ENSMUSGI | 663.7412 | 634.7222 | 947.0239 | 873.395  | -0.43159 | 0.005407 | 0.041795 | Mrps9    | chr1  | + | 42851233 | 42905682 | 2421 | protein_ccmitochond   | 734   | 656   | 930   | 789   | 11.78757 | 11.22374 | 16.24636 | 15.51361 |
| ENSMUSGI | 445.8098 | 381.2204 | 745.3994 | 549.0544 | -0.5318  | 0.004244 | 0.023551 | Cd302    | chr2  | - | 60251993 | 60284488 | 1354 | protein_ccCD302_an    | 493   | 394   | 732   | 496   | 14.15635 | 12.0533  | 22.86443 | 17.43788 |
| ENSMUSGI | 1256.044 | 1205.585 | 1950.055 | 1526.504 | -0.44417 | 0.003366 | 0.030223 | Nsa2     | chr13 | - | 97129427 | 97137926 | 2686 | protein_ccNSA2_ribo   | 1389  | 1246  | 1915  | 1379  | 20.10571 | 19.215   | 30.15302 | 24.43931 |
| ENSMUSGI | 1161.095 | 1383.617 | 1950.055 | 1696.977 | -0.46619 | 0.001618 | 0.018074 | H3f3a    | chr1  | - | 1.81E+08 | 1.81E+08 | 2841 | protein_ccH3_histo    | 1284  | 1430  | 1915  | 1533  | 17.57183 | 20.84938 | 28.50792 | 25.6863  |
| ENSMUSGI | 445.8098 | 450.535  | 628.608  | 586.1377 | -0.4186  | 0.000806 | 0.011219 | Arl1     | chr10 | + | 88730858 | 88744094 | 2080 | protein_ccADP-ribosy  | 5231  | 4703  | 6698  | 5295  | 97.77877 | 93.65693 | 126.9443 | 121.1807 |
| ENSMUSGI | 356.2861 | 325.1016 | 594.6903 | 490.3853 | -0.55754 | 0.002272 | 0.022867 | Acyp2    | chr11 | - | 30505991 | 30649587 | 863  | protein_ccacylphosp   | 394   | 336   | 584   | 443   | 17.75042 | 16.12712 | 28.62003 | 24.43564 |
| ENSMUSGI | 221.5485 | 210.929  | 536.6469 | 304.4153 | -0.69831 | 0.001269 | 0.015432 | Myf4     | chr11 | + | 1.05E+08 | 1.05E+08 | 3273 | protein_ccmyosin_lig  | 245   | 218   | 527   | 275   | 2.910337 | 2.758918 | 6.809773 | 3.999608 |
| ENSMUSGI | 1772.388 | 1893.522 | 2583.44  | 2507.275 | -0.43832 | 0.000625 | 0.009417 | Fam195b  | chr11 | - | 1.21E+08 | 1.21E+08 | 1256 | protein_ccfamily_wit  | 1960  | 1957  | 2537  | 2265  | 60.67218 | 64.5009  | 85.42773 | 85.84387 |
| ENSMUSGI | 239.6341 | 273.8207 | 471.4753 | 441.6789 | -0.67929 | 0.000303 | 0.005718 | Exoc5    | chr7  | + | 25659153 | 25668031 | 1030 | protein_ccexosome_r   | 265   | 283   | 463   | 399   | 10.00304 | 11.38093 | 19.0113  | 18.44023 |
| ENSMUSGI | 4929.228 | 5555.755 | 7661.729 | 6284.238 | -0.37778 | 0.004743 | 0.038108 | Naca     | chr10 | + | 1.28E+08 | 1.28E+08 | 7034 | protein_ccnascent_pr  | 5451  | 5742  | 7524  | 5677  | 30.12985 | 33.81343 | 45.23915 | 38.41911 |
| ENSMUSGI | 6385.118 | 6396.568 | 11246.16 | 7799.672 | -0.51341 | 0.000674 | 0.009921 | Rps7     | chr12 | - | 28630847 | 28635953 | 961  | protein_ccribosomal   | 7061  | 6611  | 11044 | 7046  | 285.6709 | 284.9523 | 486.0389 | 349.0197 |
| ENSMUSGI | 3938.132 | 4991.664 | 6246.284 | 5762.857 | -0.65738 | 9.01E-08 | 1.31E-05 | Cox5b    | chr1  | + | 36691487 | 36693385 | 566  | protein_cccytochrom   | 4182  | 4075  | 6576  | 5331  | 287.2703 | 298.2219 | 491.3754 | 448.356  |
| ENSMUSGI | 3188.49  | 3548.058 | 5756.479 | 4788.729 | -0.59351 | 9.05E-06 | 0.000484 | Rps17    | chr7  | - | 81342732 | 81345254 | 673  | protein_ccribosomal   | 3526  | 3667  | 5653  | 4326  | 203.6997 | 225.6962 | 355.2483 | 305.9864 |
| ENSMUSGI | 4072.875 | 4866.849 | 8168.845 | 5585.743 | -0.54566 | 0.000626 | 0.009417 | Rps12    | chr10 | - | 23785211 | 23787195 | 476  | protein_ccribosomal   | 4504  | 5030  | 8022  | 5046  | 367.8871 | 437.713  | 712.7607 | 504.6276 |
| ENSMUSGI | 3938.132 | 4991.664 | 6246.284 | 5762.857 | -0.3904  | 0.004424 | 0.036338 | Morf4l1  | chr9  | - | 90091665 | 90114774 | 4640 | protein_ccmortality_  | 4355  | 5159  | 6134  | 5206  | 36.49164 | 46.05491 | 55.91056 | 53.4093  |
| ENSMUSGI | 9459.668 | 10577.41 | 19121.74 | 13288    | -0.6183  | 4.53E-05 | 0.001536 | Rpl17    | chr18 | + | 75000477 | 75003381 | 775  | protein_ccribosomal   | 10461 | 10932 | 18778 | 12004 | 524.801  | 584.2871 | 1024.745 | 737.3183 |
| ENSMUSGI | 683.6353 | 638.5925 | 1320.742 | 831.3304 | -0.5791  | 0.001801 | 0.019395 | Igfbp1   | chr12 | - | 21240825 | 21286237 | 1874 | protein_ccintegrin_br | 756   | 660   | 1297  | 751   | 15.68467 | 14.58823 | 29.27106 | 19.0766  |
| ENSMUSGI | 2900.024 | 3127.168 | 5108.208 | 3950.756 | -0.52162 | 0.000191 | 0.004098 | Gm15772  | chr5  | + | 3236431  | 3236868  | 438  | pseudogen_predicted_  | 3207  | 3232  | 4928  | 3569  | 284.6741 | 305.6509 | 475.844  | 387.8851 |
| ENSMUSGI | 7064.232 | 7270.279 | 10832.73 | 9009.584 | -0.4352  | 0.000561 | 0.008656 | Rpl7a    | chr2  | + | 26910764 | 26913318 | 1043 | protein_ccribosomal   | 7812  | 7514  | 10638 | 8139  | 291.2065 | 298.4113 | 431.3638 | 371.4646 |
| ENSMUSGI | 1879.093 | 1816.118 | 2806.449 | 2325.733 | -0.43197 | 0.001814 | 0.019431 | Atp5g2   | chr15 | - | 1.03E+08 | 1.03E+08 | 753  | protein_ccATP_synth   | 2078  | 1877  | 2756  | 2101  | 107.2936 | 103.2518 | 154.7933 | 132.8195 |
| ENSMUSGI | 2020.932 | 1043.034 | 1739.265 | 1495.509 | -0.58538 | 4.98E-05 | 0.001616 | Al413582 | chr17 | - | 27563575 | 27565749 | 836  | protein_ccexpressed_  | 1129  | 1078  | 1708  | 1351  | 52.50623 | 53.41225 | 86.40714 | 76.92718 |
| ENSMUSGI | 1402.538 | 1383.617 | 1920.524 | 1816.529 | -0.38916 | 0.003479 | 0.030935 | Ufc1     | chr1  | - | 1.71E+08 | 1.71E+08 | 1677 | protein_ccubiquitin-f | 1551  | 1430  | 1886  | 1641  | 35.95853 | 35.32087 | 47.56381 | 46.58072 |
| ENSMUSGI | 204.3672 | 350.2583 | 661.8984 | 504.7758 | -0.80523 | 0.000132 | 0.003159 | Rpl35    | chr2  | - | 39001580 | 39005624 | 946  | protein_ccribosomal   | 226   | 362   | 650   | 456   | 9.288391 | 15.8506  | 29.05964 | 22.94586 |
| ENSMUSGI | 161.866  | 184.8048 | 311.6014 | 291.1317 | -0.61238 | 0.002912 | 0.027185 | Ptprm1   | chr2  | - | 90908716 | 90918258 | 3183 | processed_protein_ty  | 179   | 191   | 306   | 263   | 2.18645  | 2.485565 | 4.065864 | 3.933234 |
| ENSMUSGI | 3302.429 | 3496.778 | 5747.315 | 4228.605 | -0.49706 | 0.000725 | 0.010434 | Rpl27    | chr11 | + | 1.01E+08 | 1.01E+08 | 732  | protein_ccribosomal   | 3652  | 3614  | 5644  | 3820  | 193.9737 | 204.5057 | 326.0949 | 248.418  |
| ENSMUSGI | 9843.082 | 10906.39 | 18699.14 | 13969.89 | -0.59377 | 2.76E-05 | 0.00107  | Rps15    | chr10 | + | 80292453 | 80294114 | 572  | protein_ccribosomal   | 10885 | 11272 | 18363 | 12620 | 739.8703 | 816.269  | 1357.737 | 1050.253 |
| ENSMUSGI | 2771.617 | 2524.375 | 3783.004 | 3264.438 | -0.37918 | 0.004138 | 0.034885 | Cycs     | chr6  | - | 50562563 | 50566538 | 3123 | protein_cccytochrom   | 3065  | 2609  | 3715  | 2949  | 38.15765 | 34.60433 | 50.31006 | 44.95039 |
| ENSMUSGI | 726.1364 | 619.2412 | 1439.884 | 995.1611 | -0.72122 | 4.75E-05 | 0.001572 | Chchd1   | chr14 | + | 20703027 | 20704417 | 587  | protein_cccoiled-coil | 803   | 640   | 1414  | 899   | 53.1864  | 45.1617  | 101.8777 | 72.90416 |
| ENSMUSGI | 2208.251 | 2224.43  | 4273.827 | 3010.944 | -0.63477 | 4.23E-05 | 0.001479 | Gpx1     | chr9  | + | 1.08E+08 | 1.08E+08 | 1041 | protein_ccglutathion  | 2442  | 2299  | 4197  | 2720  | 91.20489 | 91.47799 | 170.5125 | 124.3795 |
| ENSMUSGI | 3237.321 | 3400.989 | 6761.547 | 4956.987 | -0.73703 | 5.1      |          |          |       |   |          |          |      |                       |       |       |       |       |          |          |          |          |

|          |          |          |          |          |          |          |          |           |       |   |          |          |      |                       |      |      |       |       |          |          |          |          |
|----------|----------|----------|----------|----------|----------|----------|----------|-----------|-------|---|----------|----------|------|-----------------------|------|------|-------|-------|----------|----------|----------|----------|
| ENSMUSG1 | 270.3796 | 327.0368 | 764.7472 | 400.7212 | -0.70553 | 0.001073 | 0.013573 | Gm8741    | chr17 | + | 35335909 | 35336292 | 384  | pseudogen predicted_  | 299  | 338  | 751   | 362   | 30.27354 | 36.45976 | 82.71357 | 44.87537 |
| ENSMUSG1 | 3688.556 | 3504.518 | 5517.178 | 4355.906 | -0.41702 | 0.00243  | 0.023879 | Rps2-ps10 | chr18 | - | 61259008 | 61259972 | 965  | pseudogen ribosomal_  | 4079 | 3622 | 5418  | 3935  | 164.3424 | 155.471  | 237.4541 | 194.1101 |
| ENSMUSG1 | 6344.425 | 8735.171 | 15238.94 | 12083.63 | -0.76077 | 7.85E-07 | 7.48E-05 | Rpl41     | chr10 | - | 1.29E+08 | 1.29E+08 | 695  | protein_co ribosomal_ | 7016 | 9028 | 14965 | 10916 | 392.4894 | 538.0655 | 910.6677 | 747.6691 |
| ENSMUSG1 | 1127.637 | 1541.33  | 2386.907 | 1757.86  | -0.5434  | 0.001518 | 0.017243 | Gm6472    | chrX  | - | 1.53E+08 | 1.53E+08 | 651  | pseudogen predicted_  | 1247 | 1593 | 2344  | 1588  | 74.47468 | 101.3592 | 152.2806 | 116.1182 |
| ENSMUSG1 | 210.6971 | 214.7993 | 443.9811 | 495.9201 | -0.9299  | 9.08E-07 | 8.08E-05 | Rnaset2a  | chr17 | - | 8128610  | 8148097  | 1259 | protein_co ribonuclea | 233  | 222  | 436   | 448   | 7.195374 | 7.303913 | 14.64633 | 16.93881 |
| ENSMUSG1 | 1305.78  | 1154.304 | 1915.432 | 1636.094 | -0.47683 | 0.00109  | 0.013724 | O610012G  | chr16 | - | 31948024 | 31948448 | 417  | pseudogen RIKEN_cDN   | 1444 | 1193 | 1881  | 1478  | 134.6339 | 118.5039 | 190.7747 | 168.721  |
| ENSMUSG1 | 7742.441 | 8493.28  | 11861.22 | 11099.53 | -0.46932 | 5.97E-05 | 0.001833 | Rian      | chr12 | + | 1.1E+08  | 1.1E+08  | 8089 | processed_RNA_impri   | 8562 | 8778 | 11648 | 10027 | 41.1532  | 44.94994 | 60.90102 | 59.00746 |
